# Supplementary material for: CO 2 -Promoted photoredox-catalyzed hydrosulfonylation of alkenes with sulfinates
Source: Royal Society of Chemistry journal article supplement (doi:10.1039/d5gc00057b), 2025-01-01
Supplement: d5gc00057b1.pdf [file d5gc00057b1.pdf]

## Supporting Information

*for*

### **CO<sub>2</sub>-Promoted Photoredox-Catalyzed Hydrosulfonylation of Alkenes with Sulfinates**

Wanhui Huang,<sup>a,b</sup> Ge Liu,<sup>b,c</sup> Fangyuanhang Yang,<sup>b</sup> Yuxi Ren,<sup>b</sup> Yuzhen Gao,<sup>\*,a,b,c</sup> Weiping Su<sup>\*,b,c</sup>

<sup>a</sup>College of Chemistry & Materials Science, Fujian Normal University, Fuzhou 350007, P. R. China

<sup>b</sup>State Key Laboratory of Structural Chemistry, Center for Excellence in Molecular Synthesis, Fujian Science & Technology Innovation Laboratory for Optoelectronic Information of China, Fujian Institute of Research on the Structure of Matter, 155 Yangqiao Road West, Fuzhou 350002, P. R. China

<sup>c</sup>University of Chinese Academy of Sciences, Beijing, 100049, P. R. China

\*E-mail: [gyz@fjirsm.ac.cn](mailto:gyz@fjirsm.ac.cn), [wpsu@fjirsm.ac.cn](mailto:wpsu@fjirsm.ac.cn)

## Table of Contents

|                                                                    |     |
|--------------------------------------------------------------------|-----|
| 1. General Information .....                                       | S3  |
| 2. Experimental Section.....                                       | S3  |
| 2.1 Optimization of reaction condition .....                       | S3  |
| 2.2 General procedures for synthesis of products .....             | S5  |
| 2.3 Radical-trapping experiments .....                             | S6  |
| 2.4 Deuterium-labeling experiment .....                            | S6  |
| 2.5 Reaction with radical clocks .....                             | S7  |
| 2.6 Light/Dark experiment .....                                    | S8  |
| 2.7 Gram-scale experiment.....                                     | S9  |
| 3. Datas of Compounds and Product characteristics.....             | S10 |
| 4. $^1\text{H}$ , $^{13}\text{C}$ and $^{19}\text{F}$ spectra..... | S26 |
| 5. Crystal data of Products.....                                   | S90 |
| 6 References .....                                                 | S93 |

# 1. General Information

All chemical reagents and raw materials were sourced from commercial suppliers (including Accela, Acros, Adamas-beta®, Alfa Aesar, Aladdin, Bidepharmatech Energy Chemical, TCI Chemicals, Innochem, J&K Chemicals, Laajoo, Leyan, Sigma-Aldrich, Sinocompound, and 3A Chemicals) and used as received without further purification, unless otherwise noted. The Blue LED strips (1 meter, 5 W\*8) were purchased from GeAo Chemical (China) without a light filter. The reaction contents were maintained at room temperature (around 30 °C) without using additional cooling. The distance/path from the light source to the irradiation vessel is approximately 2.0 cm and there are no filters. <sup>1</sup>H, <sup>19</sup>F and <sup>13</sup>C NMR spectra were recorded on Bruker AVANCE III HD (400 MHz) spectrometer; JEOL ECZ600S 600M spectrometer and JEOL ECZ400S (400 MHz) spectrometer, using CDCl<sub>3</sub> as solution. Chemical shifts (δ) are given in parts per million (ppm) with the solvent resonance as the internal standard (for CDCl<sub>3</sub>: 7.26 ppm, and 77.16 ppm). Spin multiplicity was abbreviated as follows: s - singlet, d - doublet, t - triplet, q - quartet, dd - doublet of doublet, td - triplet of doublet and m - multiplet. High-resolution mass spectra (HRMS) were obtained on an Impact II UHR-TOF mass spectrometry equipped with an ESI source from Bruker at Fujian Institute of Research on the Structure of Matter. Flash column chromatography (FCC) was carried out on silica gel (200 - 300 mesh). Single-crystal X-ray diffraction (SCXRD) data of all compounds were recorded using Bruker D8 ADVANCE with a graphite monochromated Mo-Kα (λ = 0.71073 Å) radiation and XtaLAB Synergy R, HyPix. The structure was solved by the direct method using a SHELXL-97 program.

## 2. Experimental Section

### 2.1 Optimization of reaction condition

**Table S1. Screening of the photocatalyst.<sup>a</sup>**

| Entry    | PC (1 mol%)                                   | Yield (%) <sup>b</sup> |
|----------|-----------------------------------------------|------------------------|
| <b>1</b> | <b>4CzIPN</b>                                 | <b>29</b>              |
| 2        | Ir(ppy) <sub>2</sub> (dtbbpy) PF <sub>6</sub> | 42                     |
| 3        | Ru(bpy) <sub>3</sub> Cl <sub>2</sub>          | 11                     |
| 4        | Eosin Y                                       | 0                      |

<sup>a</sup>Reaction conditions: **1a** (0.2 mmol), **2a** (0.3 mmol, 1.5 equiv), PC (1 mol%), H<sub>2</sub>O (5.0 equiv), CH<sub>3</sub>CN (2 mL, 0.1 M), CO<sub>2</sub> (1 atm, closed), 40 W blue LEDs, rt, 16 h. <sup>b</sup>Yield was determined by <sup>1</sup>H NMR with CHCl<sub>2</sub>CHCl<sub>2</sub> as internal standard.

**Table S2. Screening of the solvent.<sup>a</sup>**

| Entry | Solvent (2 mL) | Yield (%) <sup>b</sup> |
|-------|----------------|------------------------|

|   |                    |           |
|---|--------------------|-----------|
| 1 | DMSO               | 0         |
| 2 | Actone             | 0         |
| 3 | Chlorobenzene      | 0         |
| 4 | Tetrahydrofuran    | 0         |
| 5 | <b>1,4-dioxane</b> | <b>77</b> |
| 6 | DCM                | 0         |
| 7 | CH <sub>3</sub> CN | 24        |
| 8 | CH <sub>3</sub> OH | 0         |

<sup>a</sup>Reaction conditions: **1a** (0.2 mmol), **2a** (0.3 mmol, 1.5 equiv), 4CzIPN (1 mol%), H<sub>2</sub>O (5.0 equiv), solvent (2 mL, 0.1 M), CO<sub>2</sub> (1 atm, closed), 40 W blue LEDs, rt, 16 h. <sup>b</sup>Yield was determined by <sup>1</sup>H NMR with CHCl<sub>2</sub>CHCl<sub>2</sub> as internal standard.

**Table S3. Screening of the amount of solvent.<sup>a</sup>**

| Entry | 1,4-dioxane (M) | Yield (%) <sup>b</sup> |
|-------|-----------------|------------------------|
| 1     | 0.05            | 90                     |
| 2     | <b>0.1</b>      | <b>99</b>              |
| 3     | 0.15            | 89                     |

<sup>a</sup>Reaction conditions: **1a** (0.2 mmol), **2a** (0.3 mmol, 1.5 equiv), 4CzIPN (1 mol%), H<sub>2</sub>O (5.0 equiv), 1,4-dioxane (x M), CO<sub>2</sub> (1 atm, closed), 40 W blue LEDs, rt, 16 h. <sup>b</sup>Yield was determined by <sup>1</sup>H NMR with CHCl<sub>2</sub>CHCl<sub>2</sub> as internal standard.

**Table S4. Screening of the mount of H<sub>2</sub>O.<sup>a</sup>**

| Entry | H <sub>2</sub> O (equiv) | Yield (%) <sup>b</sup> |
|-------|--------------------------|------------------------|
| 1     | 0                        | 21                     |
| 2     | 2                        | 5                      |
| 3     | 3                        | 62                     |
| 4     | <b>5</b>                 | <b>99</b>              |
| 5     | 7                        | 95                     |
| 6     | 10                       | 91                     |
| 7     | 15                       | 97                     |
| 8     | 20                       | 92                     |

<sup>a</sup>Reaction conditions: **1a** (0.2 mmol), **2a** (0.3 mmol, 1.5 equiv), 4CzIPN (1 mol%), H<sub>2</sub>O(x equiv), 1,4-dioxane(2 mL, 0.1 M), CO<sub>2</sub> (1 atm, closed), 40 W blue LEDs, rt, 16 h. <sup>b</sup>Yield was determined by <sup>1</sup>H NMR with CHCl<sub>2</sub>CHCl<sub>2</sub> as internal standard.



## 2.2 General procedures for synthesis of products

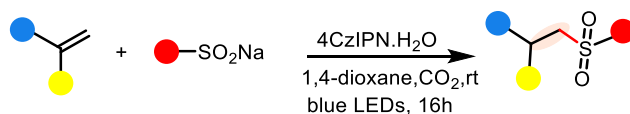

In clean and dry Schlenk tube (25 mL) reaction flask, a 1 cm Teflon magnetic stir bar was added, followed by the sequential addition of olefin (0.2 mmol, 1.0 equiv), sulfinate (1.5 equiv), 4CzIPN (1 mol%), H<sub>2</sub>O (5.0 equiv), and 1,4-dioxane (2 mL). Then, the flask was filled with CO<sub>2</sub> and the system was subjected to three cycles of purging and refilling with CO<sub>2</sub>. The mixture was placed under a 8\*5 W blue LED light source ( $\lambda_{\text{max}} = 448 \text{ nm}$ , 1.0 cm away, with cooling fan to keep the reaction temperature and stirred at ambient temperature for 16 h. After the reaction is complete, filter the reaction product mixture through a silica gel column (200 - 300 mesh) packed with small pieces of cotton at the bottom, and rinse it with EA solvent two to three times. After that, the mixture was concentrated on a rotary evaporator. The filtrate was concentrated in vacuo, and crude <sup>1</sup>H NMR spectrum was taken using CHCl<sub>2</sub>CHCl<sub>2</sub> as internal standard. The resulting residue was purified by flash silica gel chromatography or preparative thin layer chromatography using petroleum ether/ethyl acetate (from 15:1 to 1:1) as the elution to give the desired products.

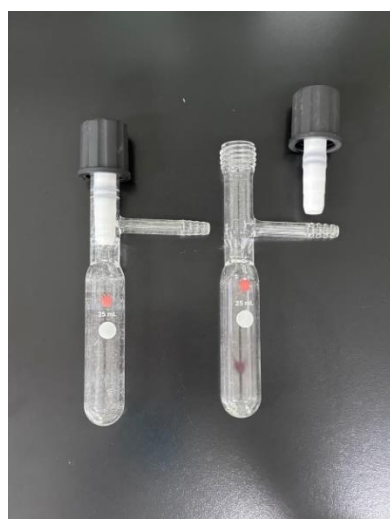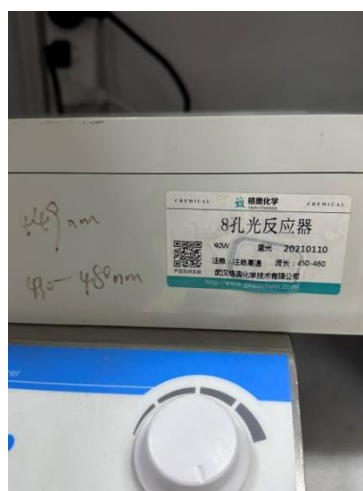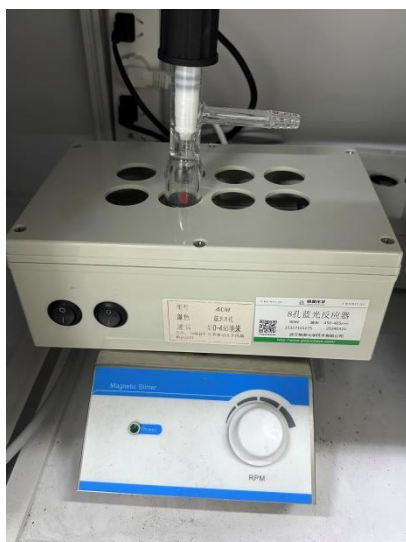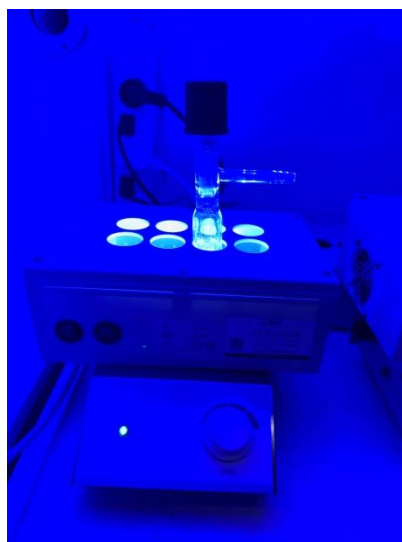

**Supplementary Figure 1.** Photograph of the photocatalytic reactor used for reactions conducted under

blue LED irradiation.

## 2.3 Radical-trapping experiments

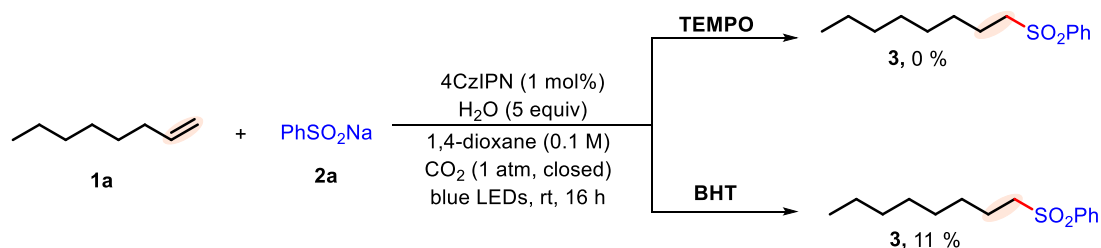

In clean and dry Schlenk tube (25 mL) reaction flask, a 1cm Teflon magnetic stir bar was added, followed by the sequential addition of **1a** (0.2 mmol, 1.0 equiv), **2a** (1.5 equiv), 4CzIPN (1 mol%), H<sub>2</sub>O (5.0 equiv), BHT or TEMPO (2.0 equiv) and 1,4-dioxane (2 mL). Then, the flask was filled with CO<sub>2</sub> and the system was subjected to three cycles of purging and refilling with CO<sub>2</sub>. The mixture was placed under a 8\*5 W blue LED light source ( $\lambda_{\text{max}} = 448$  nm, 1.0 cm away, with cooling fan to keep the reaction temperature at 15 - 40°C) and stirred at ambient temperature for 16 h. After the reaction is complete, filter the reaction product mixture through a silica gel column (200 - 300 mesh) packed with small pieces of cotton at the bottom, and rinse it with EA solvent two to three times. After that, the mixture was concentrated on a rotary evaporator. The yield was determined by <sup>1</sup>H NMR spectroscopy using CHCl<sub>2</sub>CHCl<sub>2</sub> as the internal standard. The filtrate was concentrated in vacuo, and the resulting residue was purified by flash silica gel chromatography or preparative thin layer chromatography using petroleum ether/ethyl acetate (5:1) as the elution to give the desired product **3**.

## 2.4 Deuterium-labeling experiment

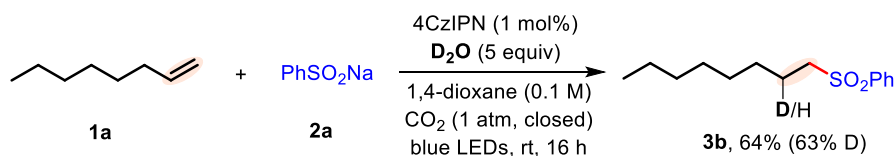

In clean and dry Schlenk tube (25 mL) reaction flask, a 1 cm Teflon magnetic stir bar was added, followed by the sequential addition of **1a** (0.2 mmol, 1.0 equiv), **2a** (1.5 equiv), 4CzIPN (1 mol%), D<sub>2</sub>O (5.0 equiv) and 1,4-dioxane (2 mL). Then, the flask was filled with CO<sub>2</sub> and the system was subjected to three cycles of purging and refilling with CO<sub>2</sub>. The mixture was placed under a 8\*5 W blue LED light source ( $\lambda_{\text{max}} = 448$  nm, 1.0 cm away, with cooling fan to keep the reaction temperature at 15 - 40°C) and stirred at ambient temperature for 16 h. After the reaction is complete, filter the reaction product mixture through a silica gel column (200 - 300 mesh) packed with small pieces of cotton at the bottom, and rinse it with EA solvent two to three times. The filtrate was concentrated in vacuo, and crude <sup>1</sup>H NMR spectrum was taken using CHCl<sub>2</sub>CHCl<sub>2</sub> as internal standard. After that, the resulting residue was purified by flash silica gel chromatography or preparative thin layer chromatography using PE/EA (7:1) as the elution to give the desired product. Yield = 64% (32.6 mg).

<sup>1</sup>H NMR (400 MHz, CDCl<sub>3</sub>)  $\delta$  7.97 - 7.86 (m, 2H), 7.68 - 7.62 (m, 1H), 7.60 - 7.53 (m, 2H), 3.24 - 2.91 (m, 2H), 1.75 - 1.61 (m, 1.37H), 1.38 - 1.13 (m, 11H), 0.84 (t,  $J = 6.8$  Hz, 3H).

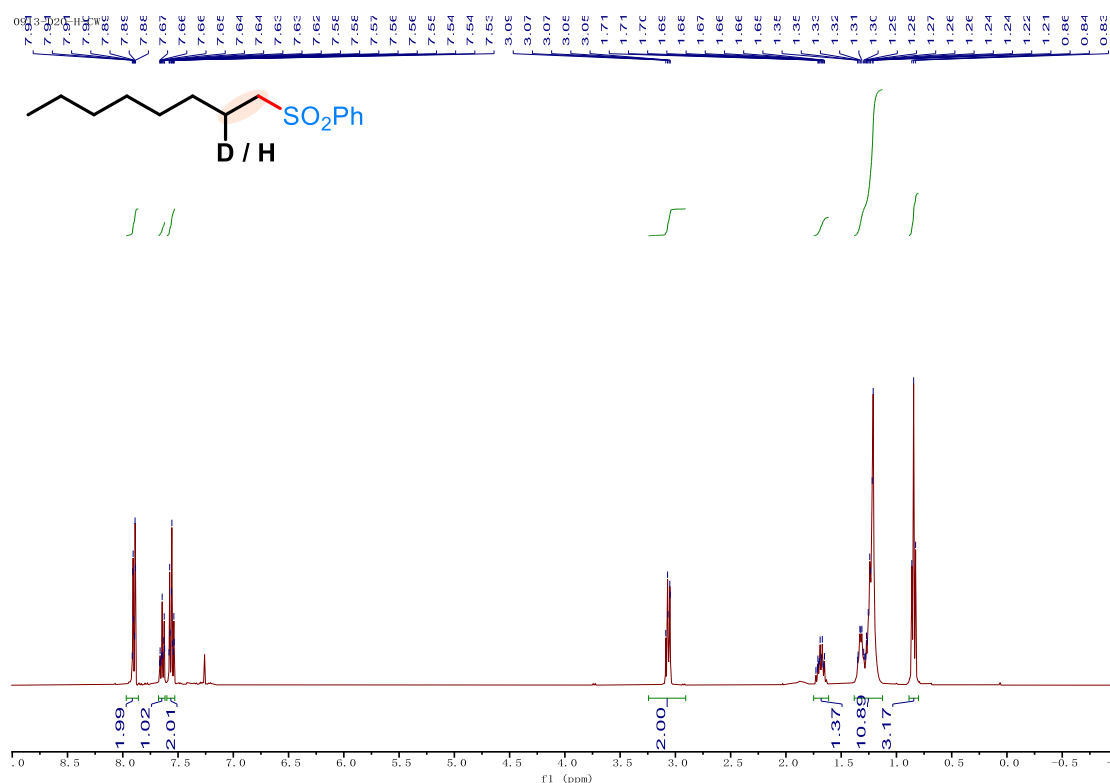

**Supplementary Figure 2.**  $^1\text{H}$  NMR Spectrum of **3b** ( $\text{CDCl}_3$  as solvent, 400 MHz).

## 2.5 Reaction with radical clocks

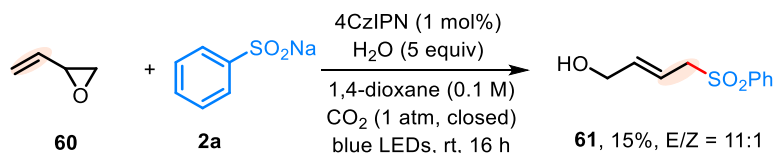

In clean and dry Schlenk tube (25 mL) reaction flask, a 1 cm Teflon magnetic stir bar was added, followed by the sequential addition of **60** (0.2 mmol, 1.0 equiv), **2a** (1.5 equiv), 4CzIPN (1 mol%),  $\text{H}_2\text{O}$  (5.0 equiv), and 1,4-dioxane (2 mL). Then, the flask was filled with  $\text{CO}_2$  and the system was subjected to three cycles of purging and refilling with  $\text{CO}_2$ . The mixture was placed under an 8\*5 W blue LED light source ( $\lambda_{\text{max}} = 448$  nm, 1.0 cm away, with cooling fan to keep the reaction temperature at 15 - 40°C) and stirred at ambient temperature for 16 h. After the reaction is complete, filter the reaction product mixture through a silica gel column (200-300 mesh) packed with small pieces of cotton at the bottom, and rinse it with EA solvent two to three times. After that, the mixture was concentrated on a rotary evaporator. The filtrate was concentrated in vacuo, and crude  $^1\text{H}$  NMR spectrum was taken using  $\text{CHCl}_2\text{CHCl}_2$  as internal standard. The resulting residue was purified by flash silica gel chromatography or preparative thin layer chromatography using PE/EA (5/1) as the elution to give the desired product **61**<sup>[1]</sup>.

$^1\text{H}$  NMR (400 MHz,  $\text{CDCl}_3$ )  $\delta$  7.88 (dt,  $J = 8.4, 1.2$  Hz, 2H), 7.70 - 7.63 (m, 1H), 7.59 - 7.55 (m, 2H), 5.81 - 5.66 (m, 2H), 4.13 (d,  $J = 3.7$  Hz, 2H), 3.84 - 3.78 (m, 2H), 1.58 - 1.45 (m, 1H).

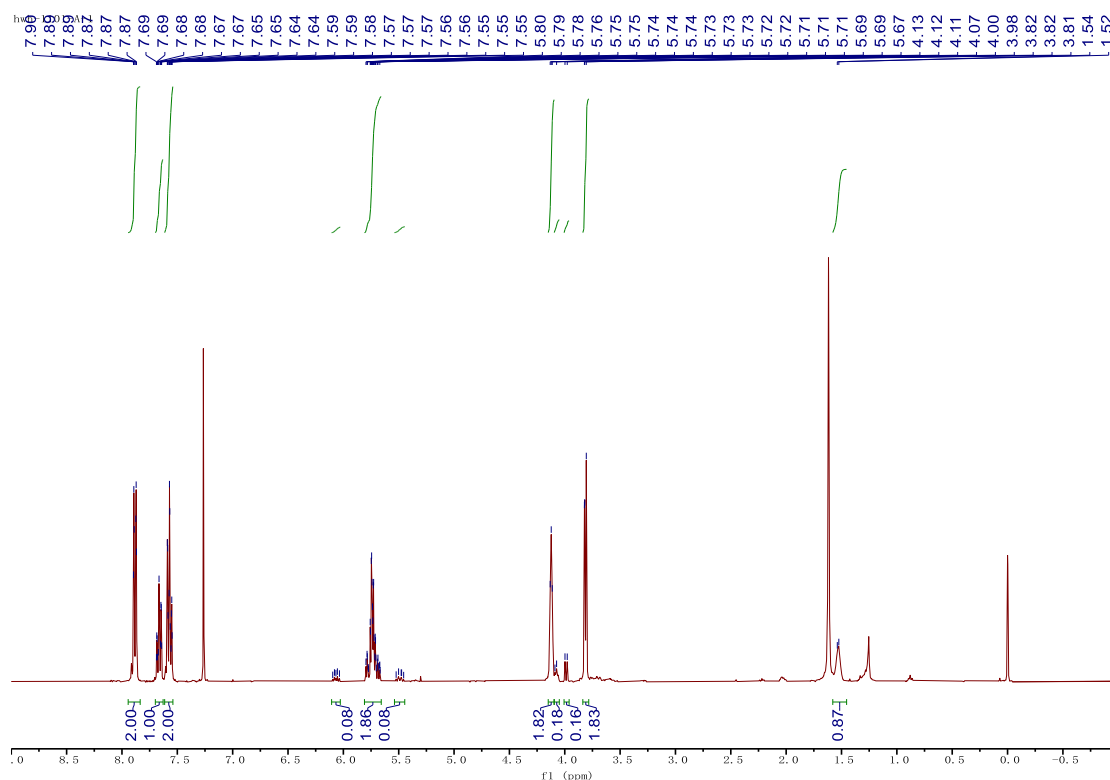

Supplementary Figure 3.  $^1\text{H}$  NMR Spectrum of **61** ( $\text{CDCl}_3$  as solvent, 400 MHz).

## 2.6 Light/Dark experiment

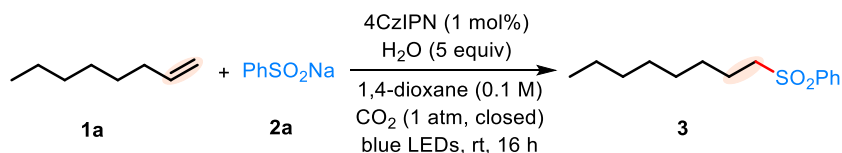

In a clean and dry 25 mL sample vial reaction flask, 1 cm Teflon magnetic stir bar was added, followed by the sequential addition of **1a** (0.2 mmol, 1.0 equiv), **2a** (1.5 equiv), 4CzIPN (1 mol%),  $\text{H}_2\text{O}$  (5.0 equiv) and 1,4-dioxane (2 mL). Subsequently, 1,3,5-trimethoxybenzene was introduced into the 2 mL standard reaction mixture as an internal standard. Gas exchange was carried out by purging the container with  $\text{CO}_2$  three times, with additional  $\text{CO}_2$  supplied using a gas bag. Prior to the reaction, 0.15 mL of the liquid mixture was collected and irradiated for one hour, followed by another 0.15 mL collection. The reaction was then conducted in the dark for 1 hour before collecting another 0.15 mL. The mixture was again irradiated for 1 hour, and 0.15 mL was collected. It was then reacted in the dark for an additional hour, followed by another 0.15 mL collection. Finally, the mixture underwent one last irradiation for 1 hour, and another 0.15 mL was collected. The solvent was subsequently removed under vacuum at elevated temperature, and the yield was determined by  $^1\text{H}$  NMR spectroscopy.

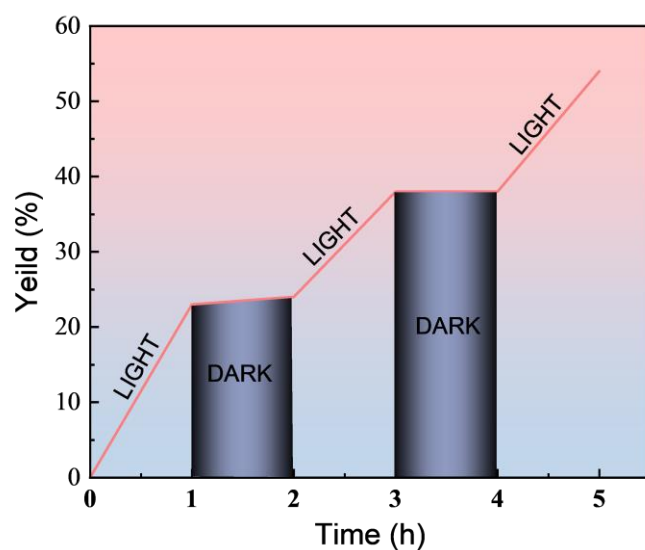

Supplementary Figure 4. Light/Dark experiment.

## 2.7 Gram-scale experiment

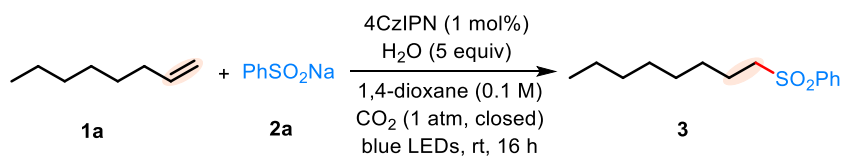

In clean and dry Schlenk tube (150 mL) reaction flask, a 5 cm Teflon magnetic stir bar was added, followed by the sequential addition of **1a** (5 mmol, 1.0 equiv, 0.561 g), **2a** (1.5 equiv), 4CzIPN (1 mol%), H<sub>2</sub>O (5.0 equiv) and 1,4-dioxane (50 mL). Then, the flask was filled with CO<sub>2</sub> and the system was subjected to ten cycles of purging and refilling with CO<sub>2</sub>. The mixture was placed under a 8\*5 W blue LED light source ( $\lambda_{\text{max}} = 448 \text{ nm}$ , 1.0 cm away, with cooling fan) and stirred at ambient temperature for 16 h. Afterwards, the filtrate was concentrated under vacuum and purified by silica gel column chromatography using EA as the eluent to obtain the desired product. And crude <sup>1</sup>H NMR spectrum was taken using CHCl<sub>2</sub>CHCl<sub>2</sub> as internal standard. The resulting residue was purified by flash silica gel chromatography using petroleum PE/EA (7:1) as the eluent to give the desired product **3**, yield = 78% (0.992 g).

### 3. Datas of Compounds and Product characteristics

#### (Octylsulfonyl)benzene (3)<sup>[2]</sup>

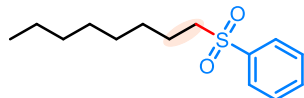

Colorless oil; Yield = 95% (48.3 mg).

**<sup>1</sup>H NMR** (400 MHz, CDCl<sub>3</sub>) δ 7.95 - 7.83 (m, 2H), 7.64 (t, *J* = 7.4 Hz, 1H), 7.55 (t, *J* = 7.6 Hz, 2H), 3.12 - 3.01 (m, 2H), 1.70 - 1.66 (m, 2H), 1.32 (p, *J* = 7.2 Hz, 2H), 1.27 - 1.16 (m, 8H), 0.84 (t, *J* = 6.8 Hz, 3H).

**<sup>13</sup>C NMR** (101 MHz, CDCl<sub>3</sub>) δ 139.2, 133.7, 129.3, 128.1, 56.4, 31.7, 29.0, 29.0, 28.3, 22.7, 22.6, 14.1

#### (Decylsulfonyl)benzene (4)<sup>[3]</sup>

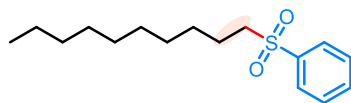

Orange yellow oily liquid; Yield = 96% (54.2 mg).

**<sup>1</sup>H NMR** (400 MHz, CDCl<sub>3</sub>) δ 7.68 - 7.56 (m, 2H), 7.36 (dd, *J* = 8.8, 6.1 Hz, 1H), 7.30 - 7.25 (m, 2H), 2.90 - 2.70 (m, 2H), 1.47 - 1.35 (m, 2H), 1.09 - 0.87 (m, 14H), 0.59 - 0.55 (m, 3H).

**<sup>13</sup>C NMR** (101 MHz, CDCl<sub>3</sub>) δ 139.2, 133.7, 129.3, 128.1, 56.3, 31.9, 29.5, 29.3, 29.0, 28.3, 22.7, 22.7, 14.2.

#### (Dodecylsulfonyl)benzene (5)<sup>[4]</sup>

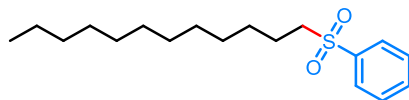

Orange yellow solid; Yield = 99% (61.4 mg).

**<sup>1</sup>H NMR** (400 MHz, CDCl<sub>3</sub>) δ 7.88 (t, *J* = 9.0 Hz, 2H), 7.62 (p, *J* = 7.2 Hz, 1H), 7.54 (dt, *J* = 10.7, 7.3 Hz, 2H), 3.05 (td, *J* = 11.0, 7.4 Hz, 2H), 1.68 - 1.64 (m, 2H), 1.35 - 1.14 (m, 18H), 0.84 (dt, *J* = 11.2, 6.6 Hz, 3H).

**<sup>13</sup>C NMR** (101 MHz, CDCl<sub>3</sub>) δ 139.2, 133.7, 129.3, 128.1, 31.9, 29.6, 29.5, 29.3, 29.2, 29.0, 28.3, 22.7, 22.7.

#### (Hexadecylsulfonyl)benzene (6)

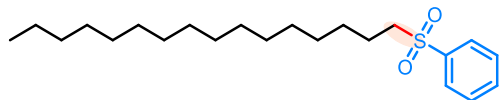

Yellow solid with a loose structure; Yield = 88% (64.5 mg);

**<sup>1</sup>H NMR** (400 MHz, CDCl<sub>3</sub>) δ 7.90 (t, *J* = 5.8 Hz, 2H), 7.64 (q, *J* = 6.2, 4.5 Hz, 1H), 7.56 (q, *J* = 7.1 Hz, 2H), 3.06 (td, *J* = 10.0, 4.6 Hz, 2H), 1.73 - 1.64 (m, 2H), 1.32 - 1.13 (m, 26H), 0.86 (q, *J* = 5.7, 5.3 Hz, 3H).

**<sup>13</sup>C NMR** (101 MHz, CDCl<sub>3</sub>) δ 138.7, 133.2, 128.8, 127.6, 55.8, 31.5, 29.2, 29.1, 29.0, 28.9, 28.8, 28.5, 27.8, 22.2, 22.2, 13.7.

**HRMS** (ESI) *m/z* [M + Na]<sup>+</sup> calcd for C<sub>22</sub>H<sub>38</sub>NaO<sub>2</sub>S 389.2486, found 389.2485.

**1-(Icosylsulfonyl)-4-methylbenzene (7)**

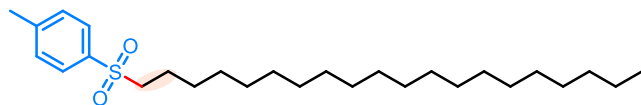

Lodine brown oily; Yield = 70% (61.1 mg).

**<sup>1</sup>H NMR** (400 MHz, CDCl<sub>3</sub>) δ 7.76 (q, *J* = 7.4, 6.9 Hz, 2H), 7.34 (t, *J* = 7.4 Hz, 2H), 3.03 (p, *J* = 7.5, 6.8 Hz, 2H), 2.42 (s, 3H), 1.67 (p, *J* = 7.5 Hz, 2H), 1.35 - 1.18 (m, 34H), 0.87 (q, *J* = 6.8 Hz, 3H).

**<sup>13</sup>C NMR** (101 MHz, CDCl<sub>3</sub>) δ 143.8, 135.5, 129.1, 127.4, 55.7, 31.2, 29.0, 28.9, 28.8, 28.7, 28.5, 28.3, 27.6, 22.0, 20.9, 13.4.

**HRMS** (ESI) *m/z* [M + Na]<sup>+</sup> calcd for C<sub>27</sub>H<sub>48</sub>NaO<sub>2</sub>S 459.3267, found 459.3269.

**1-((3-Cyclohexylpropyl)sulfonyl)-4-methylbenzene (8)**

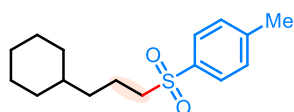

Light yellow solid; Yield = 98% (55.0 mg).

**<sup>1</sup>H NMR** (400 MHz, CDCl<sub>3</sub>) δ 7.80 - 7.74 (m, 2H), 7.35 (d, *J* = 7.9 Hz, 2H), 3.06 - 2.98 (m, 2H), 2.44 (s, 3H), 1.77 - 1.57 (m, 8H), 1.23 - 1.11 (m, 5H), 0.81 (q, *J* = 10.2, 9.8 Hz, 2H).

**<sup>13</sup>C NMR** (101 MHz, CDCl<sub>3</sub>) δ 144.7, 136.3, 130.1, 129.9, 128.3, 128.1, 56.7, 37.3, 36.0, 33.1, 26.6, 26.3, 21.8, 21.7, 20.3.

**HRMS** (ESI) *m/z* [M + Na]<sup>+</sup> calcd for C<sub>16</sub>H<sub>24</sub>NaO<sub>2</sub>S 303.1389, found 303.1389.

**((4-Phenylbutyl)sulfonyl)benzene (9)<sup>[2]</sup>**

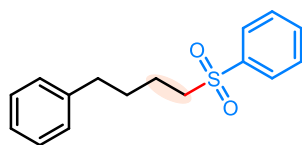

Colorless oil; Yield = 81% (44.5 mg).

**<sup>1</sup>H NMR** (400 MHz, CDCl<sub>3</sub>) δ 7.87 (t, *J* = 8.0 Hz, 2H), 7.65 (dd, *J* = 8.7, 6.5 Hz, 1H), 7.55 (q, *J* = 8.6, 8.1 Hz, 2H), 7.26 - 7.20 (m, 2H), 7.17 (dd, *J* = 8.9, 6.4 Hz, 1H), 7.10 (d, *J* = 7.8 Hz, 2H), 3.11 - 3.05 (dd, *J* = 9.0, 6.4 Hz, 2H), 2.57 (q, *J* = 8.1 Hz, 2H), 1.82 - 1.55 (m, 4H).

**<sup>13</sup>C NMR** (101 MHz, CDCl<sub>3</sub>) δ 141.4, 139.2, 133.8, 129.4, 128.6, 128.4, 128.2, 126.1, 56.2, 35.4, 30.1, 22.4.

**((6-Phenylhexyl)sulfonyl)benzene (10)**

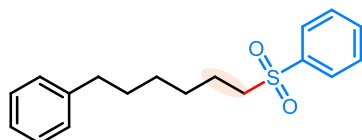

Lodine brown oily; Yield = 70% (42.3 mg).

**<sup>1</sup>H NMR** (400 MHz, CDCl<sub>3</sub>) δ 7.89 (d, *J* = 7.7 Hz, 2H), 7.67 - 7.59 (m, 1H), 7.55 (t, *J* = 7.5 Hz, 2H), 7.24 (t, *J* = 7.5 Hz, 2H), 7.18 - 7.10 (m, 3H), 3.30 - 2.74 (m, 2H), 2.55 (q, *J* = 7.7 Hz, 2H), 1.74 - 1.62 (m, 2H), 1.56 (p, *J* = 7.8 Hz, 2H), 1.41 - 1.22 (m, 4H).

**$^{13}\text{C}$  NMR** (101 MHz,  $\text{CDCl}_3$ )  $\delta$  142.4, 139.2, 133.7, 129.3, 128.4, 128.4, 128.1, 125.8, 56.3, 35.8, 31.1, 28.6, 28.2, 22.6.

**HRMS** (ESI)  $m/z$   $[\text{M} + \text{Na}]^+$  calcd for  $\text{C}_{18}\text{H}_{22}\text{NaO}_2\text{S}$  325.1233, found 325.1234.

**1-((4,4-Dimethylpentyl)sulfonyl)-4-methylbenzene (11)**

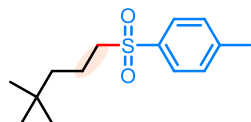

Colorless oil; Yield = 26% (13.2 mg).

**$^1\text{H}$  NMR** (400 MHz,  $\text{CDCl}_3$ )  $\delta$  7.82 - 7.71 (m, 2H), 7.39 - 7.31 (m, 2H), 3.09 - 2.90 (m, 2H), 2.43 (s, 3H), 1.75 - 1.61 (m, 2H), 1.26 - 1.14 (m, 2H), 0.83 (d,  $J$  = 8.4 Hz, 9H).

**$^{13}\text{C}$  NMR** (101 MHz,  $\text{CDCl}_3$ )  $\delta$  144.7, 136.4, 130.0, 128.1, 57.3, 42.7, 30.5, 29.3, 21.7, 18.2.

**HRMS** (ESI)  $m/z$   $[\text{M} + \text{Na}]^+$  calcd for  $\text{C}_{14}\text{H}_{22}\text{NaO}_2\text{S}$  277.1235, found 277.1233.

**6-(Phenylsulfonyl)hexan-1-ol (12)<sup>[2]</sup>**

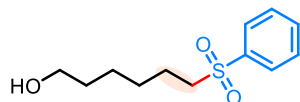

Greyish-green oil; Yield = 89% (43.1 mg).

**$^1\text{H}$  NMR** (400 MHz,  $\text{CDCl}_3$ )  $\delta$  7.88 - 7.86 (m, 2H), 7.63 (t,  $J$  = 7.4 Hz, 1H), 7.54 (t,  $J$  = 7.6 Hz, 2H), 3.56 (t,  $J$  = 6.5 Hz, 2H), 3.13 - 3.01 (m, 2H), 1.71 - 1.65 (m, 3H), 1.49 (p,  $J$  = 6.7 Hz, 2H), 1.39 - 1.31 (m, 4H).

**$^{13}\text{C}$  NMR** (101 MHz,  $\text{CDCl}_3$ )  $\delta$  139.1, 133.8, 129.4, 128.1, 62.6, 56.2, 32.3, 28.1, 25.3, 22.7.

**5-(Phenylsulfonyl)pentanoic acid (13)<sup>[2]</sup>**

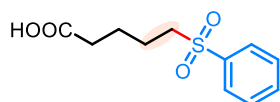

Colorless oil; Yield = 81% (39.3 mg).

**$^1\text{H}$  NMR** (600 MHz,  $\text{CDCl}_3$ )  $\delta$  7.93 - 7.86 (m, 2H), 7.66 (t,  $J$  = 7.7 Hz, 1H), 7.56 (t,  $J$  = 7.6 Hz, 2H), 3.21 - 3.03 (m, 2H), 2.34 (t,  $J$  = 6.9 Hz, 2H), 2.16 (s, 1H), 1.84 - 1.63 (m, 4H).

**$^{13}\text{C}$  NMR** (101 MHz,  $\text{CDCl}_3$ )  $\delta$  178.7, 138.9, 133.9, 129.5, 128.1, 55.9, 33.4, 23.3, 22.2.

**7-(Phenylsulfonyl)heptanoic acid (14)<sup>[2]</sup>**

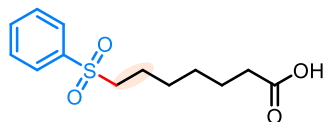

White solid; Yield = 99% (53.5 mg).

**$^1\text{H}$  NMR** (400 MHz,  $\text{CDCl}_3$ )  $\delta$  7.89 (d,  $J$  = 7.7 Hz, 2H), 7.67 - 7.63 (m, 1H), 7.56 (t,  $J$  = 7.6 Hz, 2H), 3.21 - 2.95 (m, 2H), 2.30 (t,  $J$  = 7.4 Hz, 2H), 1.74 - 1.66 (m, 2H), 1.64 - 1.48 (m, 2H), 1.37 - 1.29 (m, 4H).

**$^{13}\text{C}$  NMR** (101 MHz,  $\text{CDCl}_3$ )  $\delta$  179.7, 139.1, 133.8, 129.4, 128.1, 56.2, 33.8, 28.5, 28.0, 24.3, 22.5.



### 2-Methyl-5-tosylpentanoic acid (15)

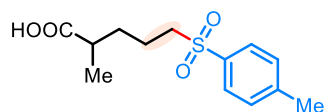

Feather shaped pale yellow crystal; Yield = 94% (50.8 mg);

**<sup>1</sup>H NMR** (400 MHz, CDCl<sub>3</sub>) δ 10.11 (s, 1H), 7.76 (d, *J* = 7.9 Hz, 2H), 7.34 (d, *J* = 7.9 Hz, 2H), 3.06 (t, *J* = 7.4 Hz, 2H), 2.42 (s, 3H), 2.43 - 2.40 (m, 1H), 1.81 - 1.42 (m, 4H), 1.14 (d, *J* = 7.0 Hz, 3H).

**<sup>13</sup>C NMR** (101 MHz, CDCl<sub>3</sub>) δ 182.1, 144.8, 136.0, 130.0, 128.1, 56.1, 38.9, 31.8, 21.7, 20.6, 16.8.

**HRMS** (ESI) *m/z* [M + Na]<sup>+</sup> calcd for C<sub>13</sub>H<sub>18</sub>NaO<sub>4</sub>S 293.0818, found 293.0818.

### Ethyl 5-tosylpentanoate (16)

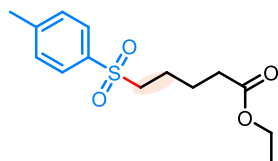

Green oil; Yield = 81% (46.1 mg).

**<sup>1</sup>H NMR** (600 MHz, CDCl<sub>3</sub>) δ 7.75 (d, *J* = 7.8 Hz, 2H), 7.34 (d, *J* = 7.9 Hz, 2H), 3.98 (t, *J* = 6.5 Hz, 2H), 3.05 (t, *J* = 8.0 Hz, 2H), 2.42 (s, 3H), 1.99 (s, 3H), 1.73 - 1.68 (m, 2H), 1.60 - 1.55 (m, 2H), 1.41 (p, *J* = 7.9 Hz, 2H).

**<sup>13</sup>C NMR** (151 MHz, CDCl<sub>3</sub>) δ 171.0, 144.6, 135.9, 129.8, 127.9, 63.7, 56.0, 27.9, 24.7, 22.3, 21.5, 20.8.

**HRMS** (ESI) *m/z* [M + Na]<sup>+</sup> calcd for C<sub>14</sub>H<sub>20</sub>NaO<sub>4</sub>S 307.0975, found 307.0973.

### Methyl 4-tosylbutanoate (17)<sup>[5]</sup>

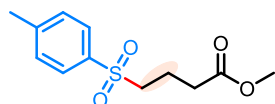

Reddish brown oily liquid; Yield = 62% (31.8 mg).

**<sup>1</sup>H NMR** (400 MHz, CDCl<sub>3</sub>) δ 7.84 - 7.70 (m, 2H), 7.35 (d, *J* = 8.0 Hz, 2H), 4.09 (t, *J* = 6.2 Hz, 2H), 3.42 - 2.93 (m, 2H), 2.43 (s, 3H), 2.10 - 2.01 (m, 2H), 2.00 (s, 3H).

**<sup>13</sup>C NMR** (101 MHz, CDCl<sub>3</sub>) δ 170.0, 144.2, 135.0, 129.2, 127.3, 61.3, 52.5, 21.7, 20.9, 20.0.

### Ethyl 4-tosylbutanoate (18)<sup>[5]</sup>

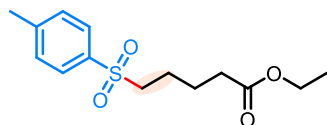

Orange yellow solid; Yield = 95% (54.0 mg).

**<sup>1</sup>H NMR** (400 MHz, CDCl<sub>3</sub>) δ 7.80 - 7.69 (m, 2H), 7.37 - 7.29 (m, 2H), 4.06 (q, *J* = 7.2 Hz, 2H), 3.13 - 2.97 (m, 2H), 2.42 (s, 3H), 2.25 (t, *J* = 6.8 Hz, 2H), 1.76 - 1.61 (m, 4H), 1.19 (t, *J* = 7.1 Hz, 3H).

**<sup>13</sup>C NMR** (101 MHz, CDCl<sub>3</sub>) δ 172.8, 144.8, 136.0, 130.0, 128.1, 60.5, 56.0, 33.6, 23.6, 22.3, 21.7, 14.2.

### 2-Tosylethyl pivalate (19)

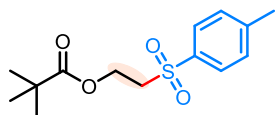

Colorless oil; Yield = 25% (14.2 mg).

**<sup>1</sup>H NMR** (400 MHz, CDCl<sub>3</sub>) δ 7.82 - 7.79 (m, 2H), 7.43 - 7.31 (m, 2H), 4.39 - 4.35 (m, 2H), 3.45 - 3.41 (m, 2H), 2.45 (d, *J* = 2.3 Hz, 3H), 1.06 (s, 9H).

**<sup>13</sup>C NMR** (101 MHz, CDCl<sub>3</sub>) δ 178.1, 145.2, 136.4, 130.2, 128.3, 57.8, 55.4, 38.7, 27.2, 27.0, 21.8.

**HRMS** (ESI) *m/z* [M + Na]<sup>+</sup> calcd for C<sub>14</sub>H<sub>20</sub>NaO<sub>4</sub>S 307.0974, found 307.0975.

**N-(Tert-butyl)-N-(naphthalen-2-ylmethyl)-5-(phenylsulfonyl)pentanamide (20)**

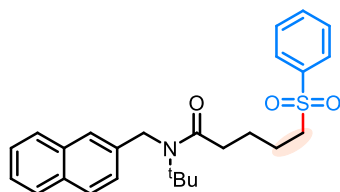

Grey green oil; Yield = 71% (65.4 mg).

**<sup>1</sup>H NMR** (400 MHz, CDCl<sub>3</sub>) δ 7.86 - 7.80 (m, 5H), 7.59 (dd, *J* = 8.6, 5.0 Hz, 2H), 7.49 (td, *J* = 7.8, 3.1 Hz, 4H), 7.27 (dd, *J* = 8.8, 3.4 Hz, 1H), 4.71 (d, *J* = 3.3 Hz, 2H), 3.07 - 3.02 (m, 2H), 2.37 - 2.22 (m, 2H), 1.68 (m, 4H), 1.44 (d, *J* = 3.4 Hz, 9H).

**<sup>13</sup>C NMR** (101 MHz, CDCl<sub>3</sub>) δ 173.4, 139.0, 136.8, 133.7, 133.4, 132.6, 129.3, 128.8, 128.0, 127.8, 127.7, 126.6, 126.0, 124.0, 123.8, 58.0, 56.1, 48.8, 35.0, 28.8, 24.1, 22.4.

**HRMS** (ESI) *m/z* [M + Na]<sup>+</sup> calcd for C<sub>26</sub>H<sub>31</sub>NNaO<sub>3</sub>S 460.1917, found 460.1919.

**Tert-butyl 4-((phenylsulfonyl)methyl)piperidine-1-carboxylate (21)**

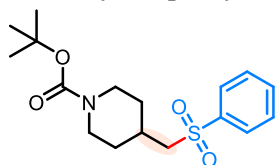

Yellow brown solid; Yield = 48% (32.5 mg).

**<sup>1</sup>H NMR** (600 MHz, CDCl<sub>3</sub>) δ 7.93 - 7.88 (m, 2H), 7.67 - 7.63 (m, 1H), 7.59 - 7.54 (m, 2H), 4.17 - 3.88 (m, 2H), 3.00 (d, *J* = 6.4 Hz, 2H), 2.80 - 2.56 (m, 2H), 2.21 - 2.11 (m, 1H), 1.85 (d, *J* = 12.9 Hz, 2H), 1.42 (s, 9H), 1.30 - 1.14 (m, 2H).

**<sup>13</sup>C NMR** (151 MHz, CDCl<sub>3</sub>) δ 154.8, 140.2, 133.9, 129.5, 127.8, 62.0, 32.0, 31.3, 28.5.

**HRMS** (ESI) *m/z* [M + Na]<sup>+</sup> calcd for C<sub>17</sub>H<sub>25</sub>NNaO<sub>4</sub>S 362.1399, found 362.1396.

**N-Methyl-N-(2-(phenylsulfonyl)ethyl)acetamide (22)**

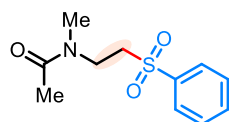

Light yellow transparent liquid; Yield = 69% (36.4 mg).

**<sup>1</sup>H NMR** (600 MHz, CDCl<sub>3</sub>) δ 7.95 - 7.91 (m, 2H), 7.68 (d, *J* = 7.5 Hz, 1H), 7.60 (t, *J* = 7.7 Hz, 2H), 3.73 (t, *J* = 6.6 Hz, 2H), 3.44 (t, *J* = 6.6 Hz, 2H), 3.08 (s, 3H), 2.00 (s, 3H).

**<sup>13</sup>C NMR** (151 MHz, CDCl<sub>3</sub>) δ 171.3, 139.4, 134.0, 129.5, 127.8, 53.4, 42.9, 37.7, 21.8.

**HRMS** (ESI)  $m/z$   $[M + Na]^+$  calcd for  $C_{11}H_{15}NNaO_3S$  264.0065, found 264.0666.

**1-((2-(Cyclohexyloxy)ethyl)sulfonyl)-4-methylbenzene (23)**

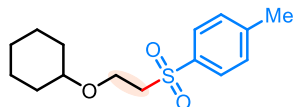

Yellow oil; Yield = 99% (60.4 mg).

**$^1H$  NMR** (400 MHz,  $CDCl_3$ )  $\delta$  7.87 - 7.72 (m, 2H), 7.34 (d,  $J$  = 7.9 Hz, 2H), 3.78 (t,  $J$  = 6.5 Hz, 2H), 3.38 (t,  $J$  = 6.4 Hz, 2H), 3.17 - 3.12 (m, 1H), 2.44 (s, 3H), 1.79 - 1.68 (m, 2H), 1.62 (d,  $J$  = 9.0 Hz, 2H), 1.53 - 1.43 (m, 1H), 1.49 - 1.10 (m, 5H).

**$^{13}C$  NMR** (101 MHz,  $CDCl_3$ )  $\delta$  144.6, 137.0, 129.8, 128.2, 78.1, 61.2, 56.9, 31.8, 25.7, 23.9, 21.7.

**HRMS** (ESI)  $m/z$   $[M + Na]^+$  calcd for  $C_{15}H_{22}NaO_3S$  305.1182, found 305.1181.

**2-(6-Tosylhexyl)oxirane (24)**

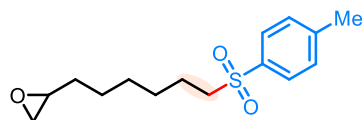

Orange red oil; Yield = 99% (60.5 mg).

**$^1H$  NMR** (600 MHz,  $CDCl_3$ )  $\delta$  7.75 - 7.73 (m, 2H), 7.32 (d,  $J$  = 7.9 Hz, 2H), 3.07 - 2.97 (m, 2H), 2.84 - 2.83 (m, 1H), 2.71 - 2.68 (m, 1H), 2.41 (s, 3H), 1.70 - 1.62 (m, 2H), 1.52 - 1.24 (m, 9H).

**$^{13}C$  NMR** (151 MHz,  $CDCl_3$ )  $\delta$  144.7, 136.2, 129.9, 128.1, 56.3, 52.2, 47.0, 32.3, 28.8, 28.2, 25.7, 22.7, 21.6.

**HRMS** (ESI)  $m/z$   $[M + Na]^+$  calcd for  $C_{15}H_{22}NaO_3S$  305.1182, found 305.1181.

**((3-Phenoxypropyl)sulfonyl)benzene (25)<sup>[6]</sup>**

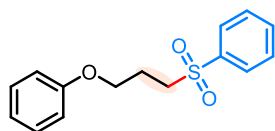

Colorless oil; Yield = 84% (46.4 mg).

**$^1H$  NMR** (400 MHz,  $CDCl_3$ )  $\delta$  7.93 (dd,  $J$  = 7.8, 2.4 Hz, 2H), 7.68 - 7.61 (m, 1H), 7.58 - 7.54 (m, 2H), 7.27 - 7.23 (m, 2H), 6.96 - 6.91 (m, 1H), 6.82 (dd,  $J$  = 8.7, 2.3 Hz, 2H), 4.01 - 3.98 (m, 2H), 3.43 - 3.11 (m, 2H), 2.23 - 2.18 (m, 2H).

**$^{13}C$  NMR** (101 MHz,  $CDCl_3$ )  $\delta$  141.3, 139.2, 133.8, 129.4, 128.5, 128.4, 128.2, 126.1, 56.2, 35.4, 30.1, 22.4.

**HRMS** (ESI)  $m/z$   $[M + Na]^+$  calcd for  $C_{13}H_{18}NaO_4S$  293.0819, found 293.0818.

**2-((3-Tosylpropoxy)methyl)oxirane (26)**

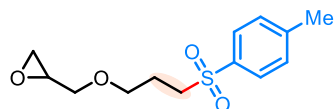

Red brown oil; Yield = 90% (48.7 mg);

**<sup>1</sup>H NMR** (600 MHz, CDCl<sub>3</sub>) δ 7.76 - 7.74 (m, 2H), 7.33 - 7.32 (m, 2H), 3.68 - 3.66 (m, 1H), 3.62 - 3.42 (m, 2H), 3.32 - 3.21 (m, 1H), 3.18 - 3.15 (m, 2H), 3.06 - 3.04 (m, 1H), 2.74 - 2.73 (m, 1H), 2.53 - 2.51 (m, 1H), 2.41 (s, 3H), 1.96 - 1.93 (m, 2H).

**<sup>13</sup>C NMR** (151 MHz, CDCl<sub>3</sub>) δ 144.5, 135.9, 129.7, 127.8, 71.3, 68.7, 53.2, 50.5, 43.8, 23.1, 21.4.

**Trimethyl (4-tosylbutyl)silane (27)**

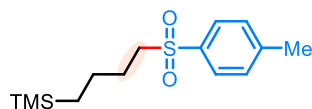

Colorless oil; Yield = 90% (51.2 mg).

**<sup>1</sup>H NMR** (600 MHz, CDCl<sub>3</sub>) δ 7.76 (d, *J* = 8.1 Hz, 2H), 7.34 (d, *J* = 8.0 Hz, 2H), 3.15 - 2.91 (m, 2H), 2.43 (s, 3H), 1.72 - 1.66 (m, 2H), 1.36 - 1.27 (m, 2H), 0.48 - 0.32 (m, 2H), -0.08 (d, *J* = 0.9 Hz, 9H).

**<sup>13</sup>C NMR** (151 MHz, CDCl<sub>3</sub>) δ 144.6, 136.4, 129.9, 128.1, 56.2, 26.4, 22.9, 21.7, 16.3, -1.8.

**HRMS** (ESI) *m/z* [M + Na]<sup>+</sup> calcd for C<sub>14</sub>H<sub>24</sub>NaO<sub>2</sub>SSi 307.1157, found 307.1158.

**Triethoxy(3-(phenylsulfonyl)propyl)silane (28)**<sup>[7]</sup>

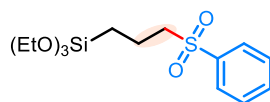

Yellow green oily liquid; Yield = 71% (49.2 mg).

**<sup>1</sup>H NMR** (400 MHz, CDCl<sub>3</sub>) δ 7.90 - 7.86 (m, 2H), 7.66 - 7.58 (m, 1H), 7.58 - 7.49 (m, 2H), 4.01 - 3.49 (m, 6H), 3.37 - 2.86 (m, 2H), 1.83 - 1.78 (m, 2H), 1.25 - 1.09 (m, 9H), 0.67 - 0.63 (m, 2H).

**<sup>13</sup>C NMR** (101 MHz, CDCl<sub>3</sub>) δ 139.2, 133.7, 129.3, 128.2, 58.6, 58.4, 18.3, 16.9, 9.4.

**Tert-butyldimethyl(3-tosylpropyl)silane (29)**

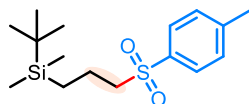

Orange yellow oil; Yield = 45% (28.1 mg).

**<sup>1</sup>H NMR** (400 MHz, CDCl<sub>3</sub>) δ 7.78 (d, *J* = 8.2 Hz, 2H), 7.35 (d, *J* = 7.9 Hz, 2H), 3.08 (dd, *J* = 9.5, 6.3 Hz, 2H), 2.45 (s, 3H), 1.79 - 1.68 (m, 2H), 0.82 (s, 9H), 0.57 - 0.45 (m, 2H), -0.10 (s, 6H).

**<sup>13</sup>C NMR** (101 MHz, CDCl<sub>3</sub>) δ 144.7, 136.5, 130.0, 128.1, 59.8, 26.5, 21.7, 18.0, 16.5, 11.7, -6.3.

**HRMS** (ESI) *m/z* [M + Na]<sup>+</sup> calcd for C<sub>16</sub>H<sub>28</sub>NaO<sub>2</sub>SSi 335.1471, found 335.1471.

**(4-(Phenylsulfonyl)butyl)boronic acid (30)**

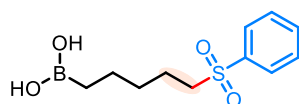

Grey Solid; Yield = 60% (30.7 mg).

**<sup>1</sup>H NMR** (400 MHz, CDCl<sub>3</sub>) δ 7.90 - 7.84 (m, 2H), 7.67 - 7.50 (m, 3H), 3.06 (t, *J* = 8.1 Hz, 2H), 1.72 - 1.64 (m, 2H), 1.48 - 1.14 (m, 4H), 0.92 - 0.62 (m, 2H).

**<sup>13</sup>C NMR** (101 MHz, CDCl<sub>3</sub>) δ 139.4, 134.2, 129.7, 128.5, 56.5, 31.1, 24.0, 23.1, 22.8.

**HRMS** (ESI) *m/z* [M + Na]<sup>+</sup> calcd for C<sub>11</sub>H<sub>17</sub>BNaO<sub>4</sub>S 279.0834, found 279.0833.

**1-((7-Chloroheptyl)sulfonyl)-4-methylbenzene (31)<sup>[8]</sup>**

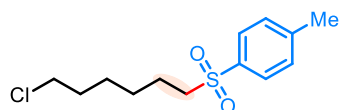

Lodine brown oily; Yield = 58% (31.9 mg).

**<sup>1</sup>H NMR** (400 MHz, CDCl<sub>3</sub>) δ 7.76 (d, *J* = 7.9 Hz, 2H), 7.34 (t, *J* = 7.2 Hz, 2H), 3.48 (t, *J* = 6.6 Hz, 2H), 3.11 - 2.97 (m, 2H), 2.43 (s, 3H), 1.73 - 1.68 (m, 4H), 1.41 - 1.35 (m, 4H).

**<sup>13</sup>C NMR** (151 MHz, CDCl<sub>3</sub>) δ 144.8, 136.2, 130.0, 128.1, 56.3, 44.8, 32.1, 27.6, 26.3, 22.7, 21.7.

**((5-Bromopentyl)sulfonyl)benzene (32)<sup>[2]</sup>**

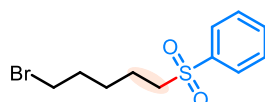

Yellow oil; Grey green oily liquid; Yield = 75% (43.7 mg).

**<sup>1</sup>H NMR** (400 MHz, CDCl<sub>3</sub>) δ 7.62 - 7.58 (m, 2H), 7.37 (dt, *J* = 8.4, 6.6, 2.2 Hz, 1H), 7.36 - 7.25 (m, 2H), 3.06 (t, *J* = 6.5 Hz, 2H), 2.92 - 2.70 (m, 2H), 1.62 - 1.49 (m, 2H), 1.44 (dt, *J* = 10.7, 7.9, 3.9 Hz, 2H), 1.32 - 1.14 (m, 2H).

**<sup>13</sup>C NMR** (101 MHz, CDCl<sub>3</sub>) δ 139.1, 133.9, 129.4, 128.1, 56.1, 33.1, 32.1, 26.9, 22.0.

**((6-Bromohexyl)sulfonyl)benzene (33)<sup>[9]</sup>**

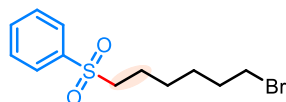

Orange yellow oil; Yield = 65% (39.5 mg).

**<sup>1</sup>H NMR** (400 MHz, CDCl<sub>3</sub>) δ 7.97 - 7.84 (m, 2H), 7.70 - 7.63 (m, 1H), 7.57 (td, *J* = 7.8, 1.8 Hz, 2H), 3.36 (td, *J* = 6.7, 1.9 Hz, 2H), 3.15 - 3.02 (m, 2H), 1.89 - 1.77 (m, 2H), 1.75 - 1.68 (m, 2H), 1.44 - 1.38 (m, 4H).

**<sup>13</sup>C NMR** (101 MHz, CDCl<sub>3</sub>) δ 139.1, 133.8, 129.4, 128.1, 56.2, 33.7, 32.3, 27.6, 27.5, 22.6.

**HRMS** (ESI) *m/z* [M + Na]<sup>+</sup> calcd for C<sub>12</sub>H<sub>17</sub>BrNaO<sub>2</sub>S 327.0025, found 327.0024.

**1-(Dec-9-en-1-ylsulfonyl)-4-methylbenzene (34)**

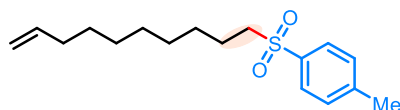

White solid; Yield = 80% (47.1 mg).

**<sup>1</sup>H NMR** (400 MHz, CDCl<sub>3</sub>) δ 7.82 - 7.73 (m, 2H), 7.35 (d, *J* = 8.0 Hz, 2H), 5.78 (ddt, *J* = 16.9, 10.1, 6.7 Hz, 1H), 5.03 - 4.89 (m, 2H), 3.09 - 3.00 (m, 2H), 2.45 (s, 3H), 2.04 - 1.98 (m, 2H), 1.73 - 1.65 (m, 2H), 1.37 - 1.29 (m, 4H), 1.24 (q, *J* = 4.2, 3.6 Hz, 6H).

**<sup>13</sup>C NMR** (101 MHz, CDCl<sub>3</sub>) δ 144.7, 139.2, 136.3, 130.0, 128.2, 114.3, 56.5, 33.8, 29.1, 29.0, 29.0, 28.9, 28.3, 22.8, 21.7.

**HRMS** (ESI) *m/z* [M + Na]<sup>+</sup> calcd for C<sub>17</sub>H<sub>26</sub>NaO<sub>2</sub>S 317.1544, found 317.1546.

**1-((2-(Cyclohex-3-en-1-yl)ethyl)sulfonyl)-4-methylbenzene (35)**

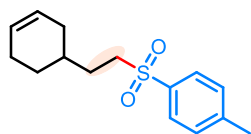

Colorless oil; Yield = 30% (17.2 mg).

**<sup>1</sup>H NMR** (400 MHz, CDCl<sub>3</sub>) δ 7.78 (d, *J* = 8.0 Hz, 2H), 7.36 (d, *J* = 7.8 Hz, 2H), 5.74 - 5.48 (m, 2H), 3.10 (dd, *J* = 9.6, 6.8 Hz, 2H), 2.45 (s, 3H), 2.11 - 1.91 (m, 3H), 1.72 - 1.55 (m, 7H).

**<sup>13</sup>C NMR** (101 MHz, CDCl<sub>3</sub>) δ 144.7, 136.3, 130.0, 128.2, 127.2, 125.7, 54.6, 32.7, 31.4, 29.1, 28.5, 24.9, 21.8.

**HRMS** (ESI) *m/z* [M + Na]<sup>+</sup> calcd for C<sub>17</sub>H<sub>26</sub>NaO<sub>2</sub>S 287.1077, found 287.1076.

### 1,4-Bis(2-tosylethoxy)butane (36)

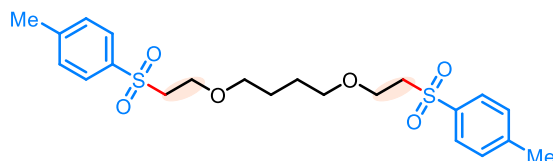

Orange yellow oil; Yield = 98% (89.0 mg).

**<sup>1</sup>H NMR** (400 MHz, CDCl<sub>3</sub>) δ 7.86 (dd, *J* = 10.4, 7.1 Hz, 4H), 7.42 (t, *J* = 8.8 Hz, 4H), 3.80 (dd, *J* = 11.4, 6.2 Hz, 4H), 3.47 - 3.40 (m, 4H), 3.36 - 3.29 (m, 4H), 2.59 - 2.35 (m, 6H), 1.43 - 1.36 (m, 4H).

**<sup>13</sup>C NMR** (101 MHz, CDCl<sub>3</sub>) δ 143.9, 136.1, 129.0, 127.3, 70.0, 63.2, 55.5, 25.1, 20.9.

**HRMS** (ESI) *m/z* [M + Na]<sup>+</sup> calcd for C<sub>22</sub>H<sub>30</sub>NaO<sub>6</sub>S<sub>2</sub> 477.1378, found 477.1376.

### 3-Methyl-4-tosylbutan-1-ol (37)

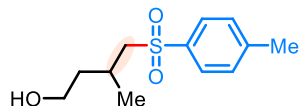

Colorless oil; Yield = 65% (31.5 mg).

**<sup>1</sup>H NMR** (400 MHz, CDCl<sub>3</sub>) δ 7.77 (d, *J* = 7.9 Hz, 2H), 7.34 (d, *J* = 7.9 Hz, 2H), 3.73 - 3.57 (m, 2H), 3.06 (ddd, *J* = 93.2, 14.2, 6.1 Hz, 2H), 2.43 (s, 3H), 2.28 (q, *J* = 6.4 Hz, 1H), 2.10 (s, 1H), 1.75 - 1.52 (m, 2H), 1.05 (d, *J* = 6.8 Hz, 3H).

**<sup>13</sup>C NMR** (101 MHz, CDCl<sub>3</sub>) δ 144.7, 136.9, 130.0, 127.9, 62.3, 59.9, 39.0, 25.7, 21.6, 20.3.

**HRMS** (ESI) *m/z* [M + Na]<sup>+</sup> calcd for C<sub>12</sub>H<sub>18</sub>NaO<sub>3</sub>S 265.0871, found 265.0869.

### ((2-Ethylbutyl)sulfonyl)benzene (38)<sup>[2]</sup>

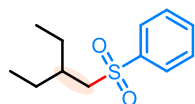

White solid; Yield = 50% (22.7 mg).

**<sup>1</sup>H NMR** (400 MHz, CDCl<sub>3</sub>) δ 7.96 - 7.86 (m, 2H), 7.67 - 7.61 (m, 1H), 7.59 - 7.53 (m, 2H), 3.01 (d, *J* = 6.0 Hz, 2H), 1.89 - 1.85 (m, 1H), 1.52 - 1.37 (m, 4H), 0.80 (t, *J* = 7.4 Hz, 6H).

**<sup>13</sup>C NMR** (101 MHz, CDCl<sub>3</sub>) δ 140.2, 133.7, 129.4, 128.0, 59.6, 35.8, 25.3, 10.3.

### 1-(Cyclopentylsulfonyl)-4-methylbenzene (39)<sup>[10]</sup>

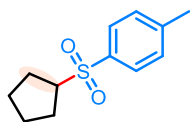

Colorless oil; Yield = 53% (23.8 mg).

**<sup>1</sup>H NMR** (400 MHz, CDCl<sub>3</sub>) δ 7.77 (d, *J* = 8.0 Hz, 2H), 7.33 (d, *J* = 8.0 Hz, 2H), 3.48 - 3.42 (m, 1H), 2.43 (s, 3H), 2.09 - 1.99 (m, 2H), 1.90 - 1.81 (m, 2H), 1.79 - 1.70 (m, 2H), 1.63 - 1.55 (m, 2H).

**<sup>13</sup>C NMR** (101 MHz, CDCl<sub>3</sub>) δ 144.5, 136.1, 129.9, 128.6, 64.4, 27.4, 25.9, 21.7.

#### 4-(2-(Phenylsulfonyl)ethyl)pyridine (41)<sup>[11]</sup>

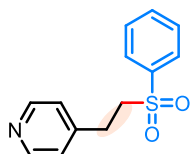

Colorless oil; Yield = 60% (29.6 mg).

**<sup>1</sup>H NMR** (400 MHz, CDCl<sub>3</sub>) δ 8.54 - 8.42 (m, 2H), 8.02 - 7.84 (m, 2H), 7.71 - 7.63 (m, 1H), 7.62 - 7.51 (m, 2H), 7.13 - 6.98 (m, 2H), 3.41 - 3.33 (m, 2H), 3.13 - 3.00 (m, 2H).

**<sup>13</sup>C NMR** (101 MHz, CDCl<sub>3</sub>) δ 150.2, 146.8, 138.8, 134.2, 129.6, 128.2, 123.8, 56.3, 28.2.

**HRMS** (ESI) *m/z* [M + Na]<sup>+</sup> calcd for C<sub>13</sub>H<sub>14</sub>NO<sub>2</sub>S 248.0740, found 248.0740.

#### 1,2,3,4,5-Pentafluoro-6-(2-(phenylsulfonyl)ethyl)benzene (42)<sup>[12]</sup>

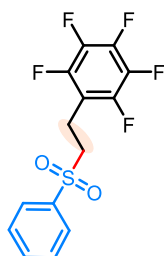

Yellow oil; Yield = 88% (59.1 mg).

**<sup>1</sup>H NMR** (400 MHz, CDCl<sub>3</sub>) δ 8.00 - 7.84 (m, 2H), 7.71 - 7.64 (m, 1H), 7.62 - 7.53 (m, 2H), 3.34 (dd, *J* = 9.3, 6.3 Hz, 2H), 3.12 (t, *J* = 7.8 Hz, 2H).

**<sup>13</sup>C NMR** (101 MHz, CDCl<sub>3</sub>) δ 146.4 (m), 143.9 (m), 138.9 (m), 138.5, 134.2, 129.6, 129.4 (m), 128.1, 127.8 (m), 110.9 (m), 54.1, 16.3.

**<sup>19</sup>F NMR** (376 MHz, CDCl<sub>3</sub>) δ -142.65 (dd, *J* = 21.9, 7.9 Hz), -155.06 (t, *J* = 20.6 Hz), -161.53 (td, *J* = 21.5, 8.3 Hz).

#### 1-Fluoro-4-(octylsulfonyl)benzene (43)

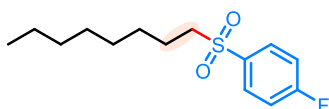

Orange yellow solid; Yield = 96% (55.4 mg).

**<sup>1</sup>H NMR** (600 MHz, CDCl<sub>3</sub>) δ 7.94 (td, *J* = 9.1, 4.9 Hz, 2H), 7.26 (q, *J* = 9.4, 8.4 Hz, 2H), 3.12 - 3.07 (m, 2H), 1.72 - 1.69 (m, 2H), 1.41 - 1.20 (m, 10H), 0.88 (dd, *J* = 11.7, 6.1 Hz, 3H).

**<sup>13</sup>C NMR** (151 MHz, CDCl<sub>3</sub>) δ 166.1 (d, *J* = 256.1 Hz), 135.6, 131.2 (d, *J* = 9.3 Hz), 116.9 (d, *J* = 22.3 Hz), 56.7, 31.9, 29.2, 29.2, 28.5, 23.0, 22.8, 14.3.

**<sup>19</sup>F NMR** (565 MHz,  $\delta$  -105.02 (d,  $J$  = 10.1 Hz).

**HRMS** (ESI)  $m/z$   $[M + Na]^+$  calcd for C<sub>14</sub>H<sub>21</sub>FNaO<sub>2</sub>S 295.1139, found 295.1138.

**1-Chloro-4-(octylsulfonyl)benzene (44)**

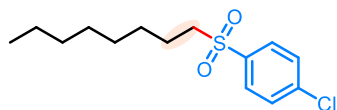

Brownish yellow oily liquid; Yield = 84% (48.5 mg).

**<sup>1</sup>H NMR** (400 MHz, CDCl<sub>3</sub>)  $\delta$  7.93 - 7.74 (m, 2H), 7.64 - 7.44 (m, 2H), 3.13 - 2.98 (m, 2H), 1.71 - 1.65 (m, 2H), 1.39 - 1.16 (m, 10H), 0.84 (t,  $J$  = 6.8 Hz, 3H).

**<sup>13</sup>C NMR** (101 MHz, CDCl<sub>3</sub>)  $\delta$  140.5, 137.7, 129.7, 129.7, 56.4, 31.7, 29.0, 29.0, 28.3, 22.7, 22.6, 14.1.

**HRMS** (ESI)  $m/z$   $[M + Na]^+$  calcd for C<sub>14</sub>H<sub>21</sub>ClNaO<sub>2</sub>S 311.0845, found 311.0843.

**1-Methyl-4-(octylsulfonyl)benzene (45)<sup>[13]</sup>**

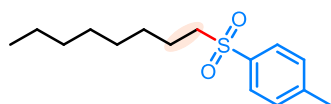

Orange yellow solid; Colorless oil; Yield = 99% (53.1 mg).

**<sup>1</sup>H NMR** (400 MHz, CDCl<sub>3</sub>)  $\delta$  7.77 (d,  $J$  = 7.9 Hz, 2H), 7.35 (d,  $J$  = 7.9 Hz, 2H), 3.11 - 2.98 (m, 2H), 2.44 (s, 3H), 1.71 - 1.65 (m, 2H), 1.31 (q,  $J$  = 6.5 Hz, 2H), 1.23 (dd,  $J$  = 14.1, 4.7 Hz, 9H), 0.85 (t,  $J$  = 6.8 Hz, 3H).

**<sup>13</sup>C NMR** (101 MHz, CDCl<sub>3</sub>)  $\delta$  144.7, 136.3, 130.0, 128.2, 56.5, 31.8, 29.1, 29.0, 28.4, 22.8, 22.7, 21.7, 14.2.

**1-(Octylsulfonyl)-4-(trifluoromethyl)benzene (46)**

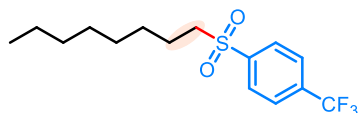

Yellow oil; Yield = 60% (38.7 mg).

**<sup>1</sup>H NMR** (400 MHz, CDCl<sub>3</sub>)  $\delta$  8.05 (dd,  $J$  = 8.5, 2.3 Hz, 2H), 7.85 (dd,  $J$  = 8.5, 2.3 Hz, 2H), 3.25 - 3.00 (m, 2H), 1.75 - 1.67 (m, 2H), 1.38 - 1.33 (m, 2H), 1.29 - 1.20 (m, 8H), 0.86 (t,  $J$  = 6.9 Hz, 3H).

**<sup>13</sup>C NMR** (101 MHz, CDCl<sub>3</sub>)  $\delta$  142.9, 135.5 (q,  $J$  = 32.1 Hz), 128.9, 126.6 (q,  $J$  = 17.1 Hz), 123.3 (q,  $J$  = 267.3 Hz), 56.3, 31.7, 29.0, 29.0, 28.3, 22.7, 14.1.

**<sup>19</sup>F NMR** (376 MHz, CDCl<sub>3</sub>)  $\delta$  -64.03.

**HRMS** (ESI)  $m/z$   $[M + Na]^+$  calcd for C<sub>15</sub>H<sub>21</sub>F<sub>3</sub>NaO<sub>2</sub>S 345.1105, found 345.1107.

**1-(Octylsulfonyl)-3-(trifluoromethyl)benzene (47)**

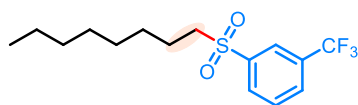

Brown oil; Yield = 58% (37.4 mg);



**<sup>1</sup>H NMR** (400 MHz, CDCl<sub>3</sub>) δ 8.18 (s, 1H), 8.11 (d, *J* = 7.9 Hz, 1H), 7.92 (d, *J* = 7.9 Hz, 1H), 7.73 (t, *J* = 7.9 Hz, 1H), 3.11 (t, *J* = 8.1 Hz, 2H), 1.72 (p, *J* = 7.8 Hz, 2H), 1.35 (q, *J* = 7.3 Hz, 2H), 1.24 (d, *J* = 7.3 Hz, 8H), 0.85 (t, *J* = 6.6 Hz, 3H).

**<sup>13</sup>C NMR** (101 MHz, CDCl<sub>3</sub>) δ 140.6, 132.2 (d, *J* = 33.7 Hz), 131.5, 130.5 (q, *J* = 3.6 Hz), 130.3, 125.4 (d, *J* = 3.9 Hz), 123.2 (d, *J* = 272.9 Hz), 56.4, 31.8, 29.0, 28.9, 28.3, 22.7, 22.6, 14.2.

**<sup>19</sup>F NMR** (376 MHz, CDCl<sub>3</sub>) δ -62.82.

**HRMS** (ESI) *m/z* [M + Na]<sup>+</sup> calcd for C<sub>15</sub>H<sub>21</sub>F<sub>3</sub>NaO<sub>2</sub>S 345.1105, found 345.1115.

#### 1-Fluoro-2-(octylsulfonyl)benzene (48)

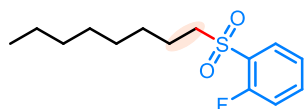

Colorless oil; Yield = 48% (26.6 mg);

**<sup>1</sup>H NMR** (400 MHz, CDCl<sub>3</sub>) δ 8.15 - 8.11 (m, 1H), 7.87 - 7.79 (m, 1H), 7.56 - 7.50 (m, 1H), 7.47 - 7.40 (m, 1H), 3.48 (dd, *J* = 9.3, 6.8 Hz, 2H), 1.91 (t, *J* = 7.8 Hz, 2H), 1.61 - 1.35 (m, 10H), 1.08 - 1.01 (m, 3H).

**<sup>13</sup>C NMR** (101 MHz, CDCl<sub>3</sub>) δ 159.7 (d, *J* = 245.0 Hz), 136.2 (d, *J* = 8.6 Hz), 130.7, 127.2 (d, *J* = 15.3 Hz), 124.9 (d, *J* = 3.8 Hz), 117.4, 117.2, 55.8, 55.7, 31.7, 29.0, 29.0, 28.3, 22.7, 22.4, 14.1.

**<sup>19</sup>F NMR** (376 MHz, CDCl<sub>3</sub>) δ -109.1.

**HRMS** (ESI) *m/z* [M + Na]<sup>+</sup> calcd for C<sub>14</sub>H<sub>21</sub>FNaO<sub>2</sub>S 295.1139, found 295.1138.

#### 1-(Heptylsulfonyl)-3,5-dimethylbenzene(49)

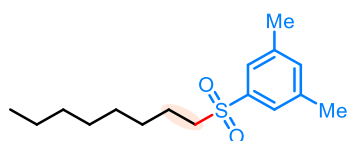

Colorless oil; Yield = 43% (24.3 mg).

**<sup>1</sup>H NMR** (400 MHz, CDCl<sub>3</sub>) δ 7.49 (d, *J* = 11.2 Hz, 2H), 7.30 - 7.19 (m, 1H), 3.08 - 3.01 (m, 2H), 2.44 - 2.34 (m, 6H), 1.76 - 1.61 (m, 2H), 1.37 - 1.20 (m, 10H), 0.91 - 0.81 (m, 3H).

**<sup>13</sup>C NMR** (101 MHz, CDCl<sub>3</sub>) δ 139.4, 139.0, 135.4, 125.6, 56.4, 31.8, 29.1, 29.0, 28.4, 22.7, 21.4, 14.2.

**HRMS** (ESI) *m/z* [M + Na]<sup>+</sup> calcd for C<sub>16</sub>H<sub>26</sub>NaO<sub>2</sub>S 305.1546, found 305.1546.

#### (Octylsulfonyl)cyclopropane (50)

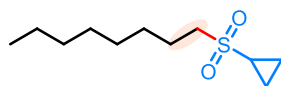

Grass green oily substance; Yield = 44% (19.2 mg).

**<sup>1</sup>H NMR** (400 MHz, CDCl<sub>3</sub>) δ 3.10 - 2.86 (m, 2H), 2.38 - 2.30 (m, 1H), 1.87 - 1.80 (m, 2H), 1.44 - 1.35 (m, 2H), 1.31 - 1.15 (m, 10H), 1.03 - 0.94 (m, 2H), 0.85 (dt, *J* = 9.0, 5.6 Hz, 3H).

**<sup>13</sup>C NMR** (101 MHz, CDCl<sub>3</sub>) δ 54.0, 31.8, 29.2, 29.1, 29.0, 28.6, 22.7, 22.3, 14.2, 4.6.

**HRMS** (ESI) *m/z* [M + Na]<sup>+</sup> calcd for C<sub>11</sub>H<sub>22</sub>NaO<sub>2</sub>S 241.1233, found 241.1233.

#### (8R,9S,13S,14S)-13-Methyl-3-(3-tosylpropoxy)-6,7,8,9,11,12,13,14,15,16-decahydro-17H-cyclopenta[a]phenanthren-17-one (51)

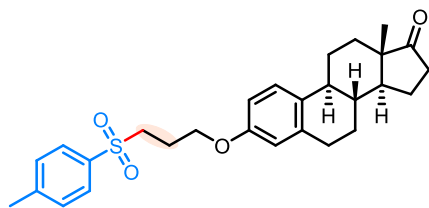

Colorless oil; Yield = 43% (40.2 mg).

**<sup>1</sup>H NMR** (600 MHz, CDCl<sub>3</sub>) δ 7.83 - 7.77 (m, 2H), 7.36 (d, *J* = 8.0 Hz, 2H), 7.17 (dd, *J* = 8.7, 1.1 Hz, 1H), 6.63 (dd, *J* = 8.6, 2.8 Hz, 1H), 6.57 (d, *J* = 2.7 Hz, 1H), 3.98 (t, *J* = 6.0 Hz, 2H), 3.34 - 3.23 (m, 2H), 2.87 - 2.85 (m, 2H), 2.49 - 2.47 (m, 1H), 2.45 (s, 3H), 2.49 - 2.36 (m, 1H), 2.25 - 2.22 (m, 1H), 2.21 - 2.10 (m, 3H), 2.08 - 2.02 (m, 1H), 2.03 - 1.99 (m, 1H), 1.97 - 1.91 (m, 1H), 1.64 - 1.59 (m, 1H), 1.59 - 1.54 (m, 1H), 1.51 - 1.45 (m, 2H), 1.46 - 1.37 (m, 1H), 1.34 - 1.21 (m, 1H), 0.90 (s, 3H).

**<sup>13</sup>C NMR** (151 MHz, CDCl<sub>3</sub>) δ 221.1, 156.6, 144.9, 138.0, 136.3, 132.7, 130.1, 128.2, 126.6, 114.7, 112.3, 65.7, 53.6, 50.5, 48.1, 44.1, 38.5, 36.0, 31.7, 29.8, 26.7, 26.1, 23.3, 21.8, 21.7, 14.0.

**HRMS** (ESI) *m/z* [M + Na]<sup>+</sup> calcd for C<sub>28</sub>H<sub>34</sub>NaO<sub>4</sub>S 489.2071, found 489.2070.

#### 2-Methoxy-4-(3-tosylpropyl)phenyl 4-(N,N-dipropylsulfamoyl)benzoate (52)

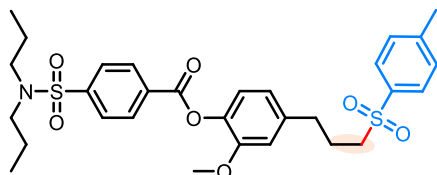

Colorless oil; Yield = 30% (35.3 mg)

**<sup>1</sup>H NMR** (400 MHz, CDCl<sub>3</sub>) δ 8.31 (d, *J* = 8.1 Hz, 2H), 7.93 (d, *J* = 8.1 Hz, 2H), 7.77 (d, *J* = 8.0 Hz, 2H), 7.36 (d, *J* = 7.9 Hz, 2H), 7.04 (d, *J* = 8.0 Hz, 1H), 6.85 - 6.60 (m, 2H), 3.78 (s, 3H), 3.23 - 2.99 (m, 6H), 2.72 (t, *J* = 7.5 Hz, 2H), 2.45 (s, 3H), 2.17 - 1.97 (m, 2H), 1.61 - 1.54 (m, 4H), 0.88 (t, *J* = 7.4 Hz, 6H).

**<sup>13</sup>C NMR** (101 MHz, CDCl<sub>3</sub>) δ 163.6, 151.1, 144.9, 139.5, 138.2, 136.2, 132.8, 131.0, 130.1, 128.2, 127.2, 122.8, 120.7, 112.7, 56.0, 55.5, 50.1, 34.2, 24.4, 22.1, 21.8, 11.3, 1.1.

**HRMS** (ESI) *m/z* [M + Na]<sup>+</sup> calcd for C<sub>30</sub>H<sub>37</sub>NNaO<sub>7</sub>S<sub>2</sub> 610.1904, found 610.1904.

#### N-(4-tosylbutyl)morpholine-4-carboxamide (53)

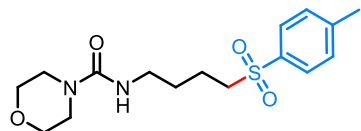

Grey Solid; Yield = 75% (51.0 mg).

**<sup>1</sup>H NMR** (400 MHz, CDCl<sub>3</sub>) δ 7.75 (d, *J* = 7.8 Hz, 2H), 7.35 (d, *J* = 7.8 Hz, 2H), 5.76 (s, 1H), 4.05 - 3.86 (m, 2H), 3.37 (dt, *J* = 11.7, 5.8 Hz, 2H), 3.22 (q, *J* = 6.5 Hz, 2H), 3.09 (t, *J* = 7.7 Hz, 2H), 2.44 (s, 3H), 1.85 - 1.57 (m, 8H).

**<sup>13</sup>C NMR** (101 MHz, CDCl<sub>3</sub>) δ 174.6, 145.0, 136.1, 130.1, 128.1, 67.3, 55.8, 42.3, 38.5, 29.3, 28.3, 21.7, 20.1.

**HRMS** (ESI) *m/z* [M + Na]<sup>+</sup> calcd for C<sub>16</sub>H<sub>24</sub>N<sub>2</sub>O<sub>4</sub>S 362.1396, found 362.1397.

**4-(N,N-dipropylsulfamoyl)-N-(4-tosylbutyl)benzamide (54)**

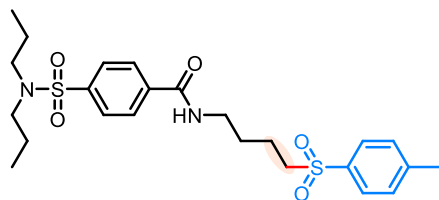

Grass green oily substance; Yield = 99% (98.0 mg).

**<sup>1</sup>H NMR** (400 MHz, CDCl<sub>3</sub>) δ 7.84 (d, *J* = 8.2 Hz, 2H), 7.74 (dd, *J* = 11.9, 8.1 Hz, 4H), 7.32 (d, *J* = 7.9 Hz, 2H), 6.92 (t, *J* = 5.8 Hz, 1H), 3.40 (q, *J* = 6.3 Hz, 2H), 3.07 (dt, *J* = 15.7, 7.5 Hz, 6H), 2.42 (s, 3H), 1.80 - 7.70 (m, 4H), 1.56 - 1.46 (m, 4H), 0.84 (t, *J* = 7.4 Hz, 6H).

**<sup>13</sup>C NMR** (101 MHz, CDCl<sub>3</sub>) δ 166.4, 144.9, 142.5, 138.1, 135.9, 130.0, 128.0, 127.8, 127.1, 55.7, 50.0, 39.3, 27.9, 21.9, 21.7, 20.1, 11.2

**HRMS** (ESI) *m/z* [M + Na]<sup>+</sup> calcd for C<sub>24</sub>H<sub>34</sub>N<sub>2</sub>NaO<sub>5</sub>S<sub>2</sub> 517.1800, found 517.1801.

**N-(4-tosylbutyl)adamantane-1-carboxamide (55)**

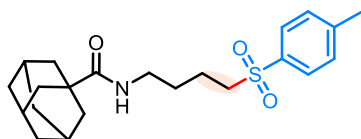

Grey oil; Yield = 56% (43.6 mg).

**<sup>1</sup>H NMR** (400 MHz, CDCl<sub>3</sub>) δ 7.75 (d, *J* = 7.9 Hz, 2H), 7.34 (d, *J* = 7.9 Hz, 2H), 5.72 (s, 1H), 3.19 (q, *J* = 6.5 Hz, 2H), 3.13 - 3.03 (m, 2H), 2.42 (s, 3H), 2.03 - 1.96 (m, 3H), 1.76 (d, *J* = 2.9 Hz, 6H), 1.74 - 1.55 (m, 10H).

**<sup>13</sup>C NMR** (101 MHz, CDCl<sub>3</sub>) δ 178.2, 144.7, 136.0, 129.9, 128.1, 55.7, 40.6, 39.2, 38.2, 36.5, 28.2, 28.1, 21.6, 20.0.

**HRMS** (ESI) *m/z* [M + Na]<sup>+</sup> calcd for C<sub>22</sub>H<sub>31</sub>NNaO<sub>3</sub>S 412.1919, found 412.1917.

**2-Methoxy-4-(3-tosylpropyl)phenyl 3-(4,5-diphenyloxazol-2-yl)propanoate (56)**

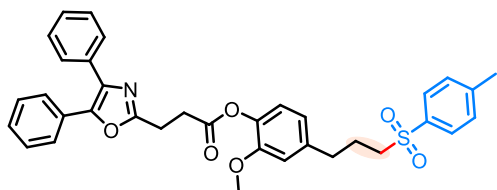

Colorless solid; Yield = 32% (38.1 mg).

**<sup>1</sup>H NMR** (400 MHz, CDCl<sub>3</sub>) δ 7.76 (d, *J* = 7.9 Hz, 2H), 7.65 (d, *J* = 7.4 Hz, 2H), 7.59 (d, *J* = 7.3 Hz, 2H), 7.41 - 7.30 (m, 8H), 6.93 (d, *J* = 8.0 Hz, 1H), 6.75 - 6.58 (m, 2H), 3.73 (s, 3H), 3.31 (t, *J* = 7.4 Hz, 2H), 3.19 (t, *J* = 7.4 Hz, 2H), 3.13 - 2.99 (m, 2H), 2.68 (t, *J* = 7.5 Hz, 2H), 2.44 (s, 3H), 2.03 (p, *J* = 7.7 Hz, 2H).

**<sup>13</sup>C NMR** (101 MHz, CDCl<sub>3</sub>) δ 170.4, 161.7, 151.1, 145.6, 144.8, 139.1, 138.2, 136.2, 135.3, 132.5, 130.1, 129.1, 128.8, 128.7, 128.6, 128.2, 128.2, 128.0, 126.6, 122.8, 120.5, 112.6, 55.9, 55.5, 34.1, 31.0, 24.4, 23.7, 21.7.

**HRMS** (ESI) *m/z* [M + Na]<sup>+</sup> calcd for C<sub>35</sub>H<sub>33</sub>NNaO<sub>6</sub>S 618.1923, found 618.1921.

**5-Tosylpentyl 2-(1-(4-chlorobenzoyl)-5-methoxy-2-methyl-1H-indol-3-yl)acetate (57)**

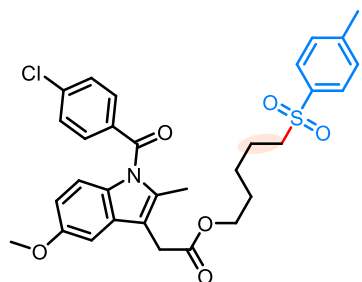

White solid; Yield = 59% (37.7 mg).

**<sup>1</sup>H NMR** (400 MHz, CDCl<sub>3</sub>) δ 7.76 (d, *J* = 8.1 Hz, 2H), 7.71 - 7.61 (m, 2H), 7.51 - 7.43 (m, 2H), 7.35 (d, *J* = 8.0 Hz, 2H), 6.94 (d, *J* = 2.6 Hz, 1H), 6.86 (d, *J* = 9.0 Hz, 1H), 6.65 (dd, *J* = 9.0, 2.6 Hz, 1H), 4.05 (t, *J* = 6.4 Hz, 2H), 3.81 (s, 3H), 3.63 (s, 2H), 3.04 - 2.90 (m, 2H), 2.44 (s, 3H), 2.37 (s, 3H), 1.72 - 1.56 (m, 5H), 1.38 - 1.31 (m, 2H).

**<sup>13</sup>C NMR** (101 MHz, CDCl<sub>3</sub>) δ 171.0, 168.4, 156.1, 144.8, 139.4, 136.3, 136.1, 134.0, 131.3, 130.9, 130.7, 130.0, 129.3, 128.2, 115.1, 112.7, 111.5, 101.6, 64.5, 56.2, 55.8, 30.5, 28.2, 24.9, 22.5, 21.8, 13.5.

**HRMS** (ESI) *m/z* [M + Na]<sup>+</sup> calcd for C<sub>17</sub>H<sub>28</sub>NaO<sub>2</sub>S 319.1701, found 319.1702.

#### 5-Methyl-4-(4-(octylsulfonyl)phenyl)-3-phenylisoxazole (58)

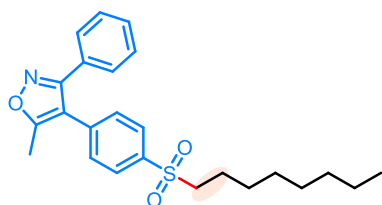

White solid; Yield = 63% (52 mg).

**<sup>1</sup>H NMR** (400 MHz, CDCl<sub>3</sub>) δ 7.89 (d, *J* = 7.9 Hz, 2H), 7.46 - 7.28 (m, 7H), 3.41 - 2.80 (m, 2H), 2.49 (s, 3H), 1.74 (p, *J* = 7.6 Hz, 2H), 1.37 (p, *J* = 7.1 Hz, 2H), 1.25 (d, *J* = 11.4 Hz, 8H), 0.85 (t, *J* = 6.5 Hz, 3H).

**<sup>13</sup>C NMR** (101 MHz, CDCl<sub>3</sub>) δ 167.4, 161.2, 138.4, 136.3, 130.5, 129.9, 128.8, 128.5, 128.5, 114.5, 56.3, 31.7, 29.1, 29.0, 28.3, 22.6, 14.1, 11.9.

**HRMS** (ESI) *m/z* [M + Na]<sup>+</sup> calcd for C<sub>24</sub>H<sub>29</sub>NNaO<sub>3</sub>S 434.1760, found 434.1760.

#### 5-(2-Ethoxy-5-((octylsulfonyl)methyl)phenyl)-1-methyl-3-propyl-1H-pyrazolo[4,3-d]pyrimidine (59)

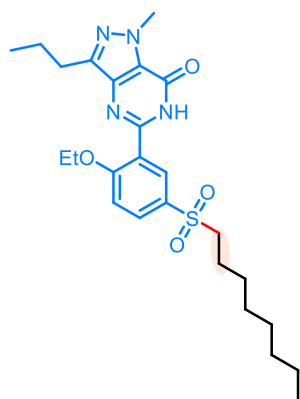

White solid; Yield = 74% (72.0 mg).

**<sup>1</sup>H NMR** (400 MHz, CDCl<sub>3</sub>) δ 10.80 (s, 1H), 8.93 (s, 1H), 7.97 (d, *J* = 8.8 Hz, 1H), 7.18 (dd, *J* = 8.9, 2.7 Hz, 1H), 4.39 - 4.36 (m, 2H), 4.27 (d, *J* = 2.7 Hz, 3H), 3.27 - 3.05 (m, 2H), 2.96 - 2.91 (m, 2H), 1.86 - 1.84 (m, 2H), 1.75 - 1.73 (m, 2H), 1.49 - 1.11 (m, 13H), 1.03 (td, *J* = 7.5, 2.8 Hz, 3H), 0.84 (td, *J* = 7.0, 2.9 Hz, 3H).

**<sup>13</sup>C NMR** (101 MHz, CDCl<sub>3</sub>) δ 160.0, 153.8, 147.2, 146.5, 138.4, 132.6, 132.2, 131.8, 124.6, 121.5, 113.3, 66.3, 56.6, 38.4, 31.8, 29.1, 29.0, 28.4, 27.7, 22.9, 22.7, 22.5, 14.7, 14.2.

**HRMS** (ESI) *m/z* [M + Na]<sup>+</sup> calcd for C<sub>25</sub>H<sub>36</sub>N<sub>4</sub>O<sub>4</sub>S 511.2457, found 511.2349.

**(E)-4-(Phenylsulfonyl)but-2-en-1-ol (61)<sup>[2]</sup>**

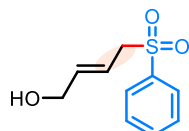

Colorless oil; Yield = 15% (6.4 mg).

**<sup>1</sup>H NMR** (400 MHz, CDCl<sub>3</sub>) δ 7.88 (dt, *J* = 8.4, 1.2 Hz, 2H), 7.70 - 7.63 (m, 1H), 7.59 - 7.55 (m, 2H), 5.81 - 5.66 (m, 2H), 4.13 (d, *J* = 3.7 Hz, 2H), 3.84 - 3.78 (m, 2H), 1.58 - 1.45 (m, 1H).

**<sup>13</sup>C NMR** (101 MHz, CDCl<sub>3</sub>) δ 139.8, 134.0, 129.3, 128.6, 117.0, 62.7, 59.7.

**1-(((4-Isopropylcyclohex-1-en-1-yl)methyl)sulfonyl)-4-methylbenzene (62)<sup>[10]</sup>**

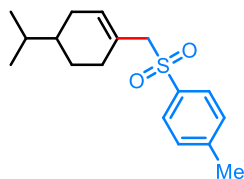

White solid; Yield = 98% (57.3 mg).

**<sup>1</sup>H NMR** (600 MHz, CDCl<sub>3</sub>) δ 7.71 (dd, *J* = 8.2, 1.3 Hz, 2H), 7.31 (d, *J* = 7.9 Hz, 2H), 5.39 (dd, *J* = 4.9, 2.6 Hz, 1H), 3.65 (s, 2H), 2.43 (s, 3H), 2.10 (dd, *J* = 8.3, 4.3 Hz, 2H), 2.01 - 1.90 (m, 1H), 1.75 - 1.61 (m, 2H), 1.47 - 1.36 (m, 1H), 1.22 - 1.08 (m, 2H), 0.91 - 0.78 (m, 6H).

**<sup>13</sup>C NMR** (151 MHz, CDCl<sub>3</sub>) δ 144.5, 135.8, 132.8, 129.6, 128.6, 126.1, 64.6, 39.3, 32.0, 29.5, 29.4, 26.2, 21.7, 20.0, 19.7.

**(1S,11S,Z)-7,7,11-trimethyl-4-((phenylsulfonyl)methyl)-12-oxabicyclo[9.1.0]dodec-4-ene (63)**

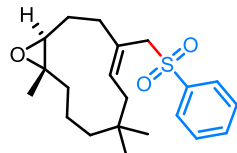

Yellow solid; Yield = 99% (71.7 mg).

**<sup>1</sup>H NMR** (400 MHz, CDCl<sub>3</sub>) δ 7.92 - 7.79 (m, 2H), 7.67 - 7.59 (m, 1H), 7.59 - 7.50 (m, 2H), 5.53 - 5.50 (m, 1H), 3.94 (dd, *J* = 13.8, 4.4 Hz, 1H), 3.56 (dd, *J* = 14.2, 4.8 Hz, 1H), 2.66 (dt, *J* = 11.2, 2.9 Hz, 1H), 2.53 - 2.40 (m, 1H), 2.19 (tt, *J* = 13.6, 4.9 Hz, 1H), 2.03 - 1.90 (m, 2H), 1.70 - 1.64 (m, 1H), 1.44 - 1.27 (m, 2H), 1.19 - 0.92 (m, 6H), 0.84 - 0.50 (m, 8H).

**<sup>13</sup>C NMR** (101 MHz, CDCl<sub>3</sub>) δ 138.14, 134.30, 133.90, 129.22, 128.88, 125.35, 62.51, 62.35, 56.58, 40.57, 38.21, 37.28, 35.05, 32.94, 29.29, 27.94, 24.22, 18.40, 17.74.

## 4. $^1\text{H}$ , $^{13}\text{C}$ and $^{19}\text{F}$ spectra

$^1\text{H}$  NMR Spectrum of 3 ( $\text{CDCl}_3$  as solvent, 400 MHz)

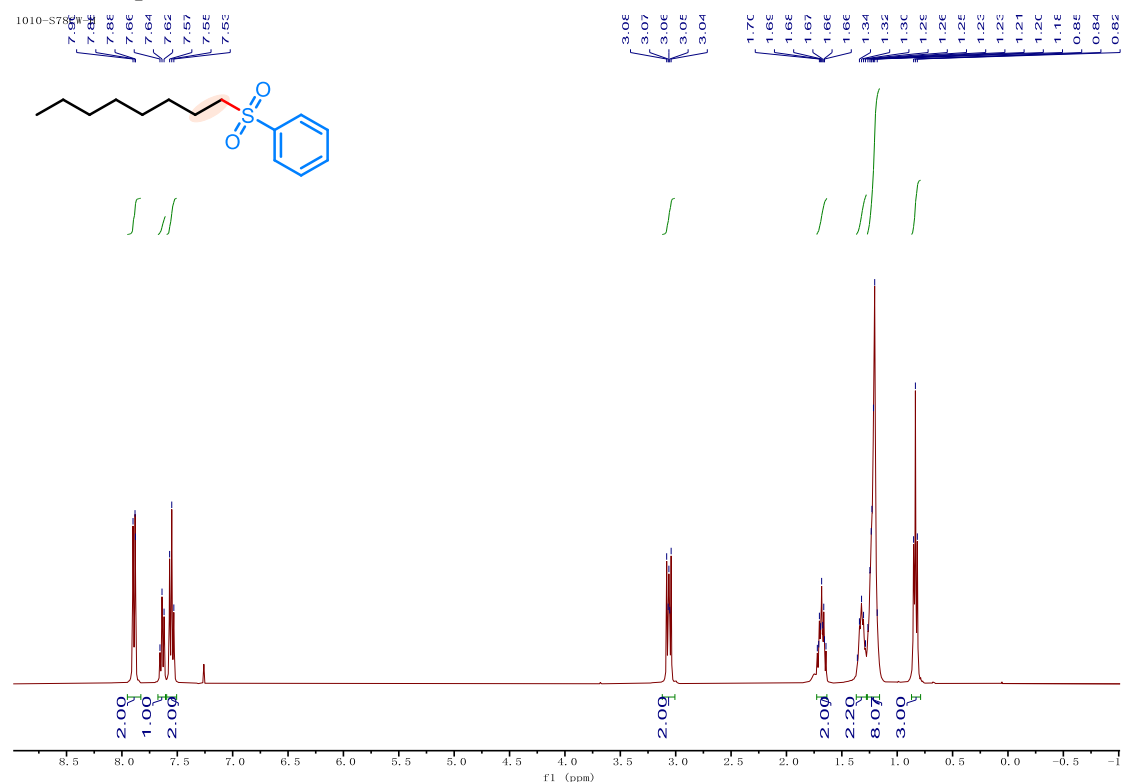

$^{13}\text{C}$   $\{^1\text{H}\}$  NMR Spectrum of 3 ( $\text{CDCl}_3$  as solvent, 101 MHz)

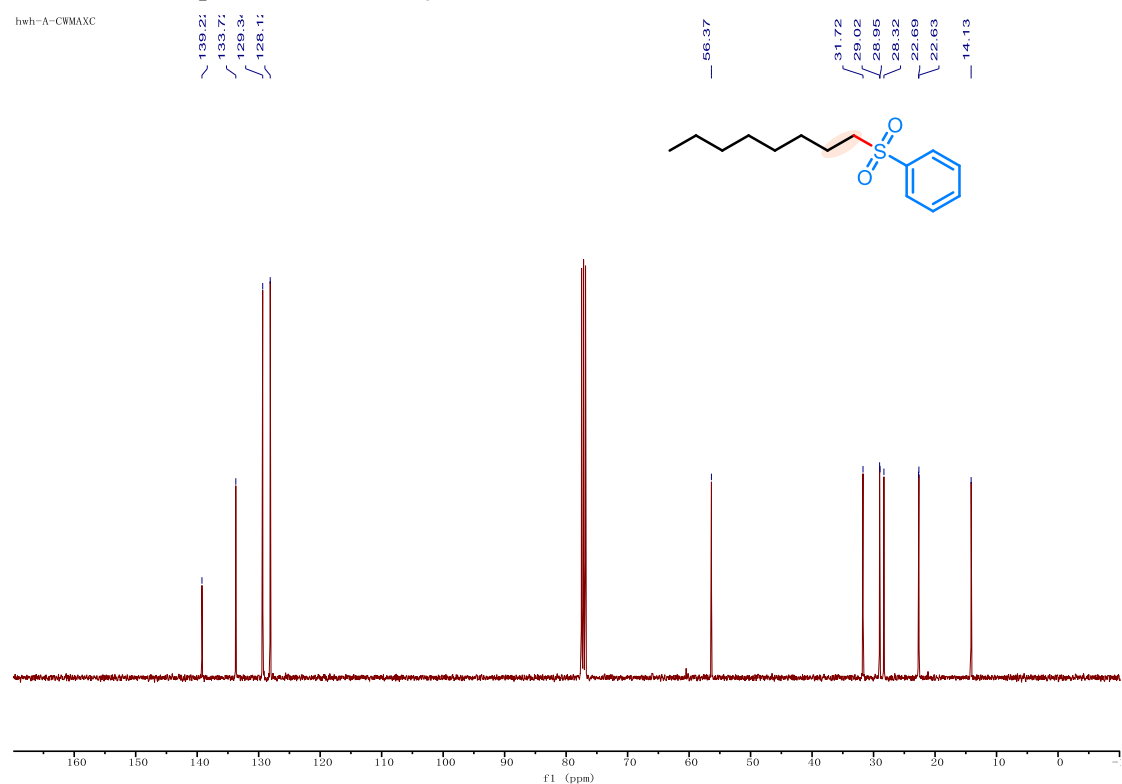

**<sup>1</sup>H NMR Spectrum (CDCl<sub>3</sub>) of 1-phenyl-1-octyne**

**Chemical Structure:** CCCCCCCCC#CC1=CC=CC=C1

**Peak Data:**

| Chemical Shift (ppm) | Integration |
|----------------------|-------------|
| 7.25 - 7.35          | 2.00        |
| 7.35 - 7.45          | 1.00        |
| 7.45 - 7.55          | 2.00        |
| 2.80 - 2.85          | 2.00        |
| 1.40 - 1.50          | 2.00        |
| 0.90 - 1.00          | 14.51       |
| 0.50 - 0.60          | 3.03        |

**Chemical Shifts (ppm):** 7.45, 7.44, 7.43, 7.42, 7.41, 7.40, 7.39, 7.38, 7.37, 7.36, 7.35, 7.34, 7.33, 7.32, 7.31, 7.30, 7.29, 7.28, 7.27, 7.26, 7.25, 7.24, 7.23, 7.22, 7.21, 7.20, 7.19, 7.18, 7.17, 7.16, 7.15, 7.14, 7.13, 7.12, 7.11, 7.10, 7.09, 7.08, 7.07, 7.06, 7.05, 7.04, 7.03, 7.02, 7.01, 7.00, 6.99, 6.98, 6.97, 6.96, 6.95, 6.94, 6.93, 6.92, 6.91, 6.90, 6.89, 6.88, 6.87, 6.86, 6.85, 6.84, 6.83, 6.82, 6.81, 6.80, 6.79, 6.78, 6.77, 6.76, 6.75, 6.74, 6.73, 6.72, 6.71, 6.70, 6.69, 6.68, 6.67, 6.66, 6.65, 6.64, 6.63, 6.62, 6.61, 6.60, 6.59, 6.58, 6.57, 6.56, 6.55, 6.54, 6.53, 6.52, 6.51, 6.50, 6.49, 6.48, 6.47, 6.46, 6.45, 6.44, 6.43, 6.42, 6.41, 6.40, 6.39, 6.38, 6.37, 6.36, 6.35, 6.34, 6.33, 6.32, 6.31, 6.30, 6.29, 6.28, 6.27, 6.26, 6.25, 6.24, 6.23, 6.22, 6.21, 6.20, 6.19, 6.18, 6.17, 6.16, 6.15, 6.14, 6.13, 6.12, 6.11, 6.10, 6.09, 6.08, 6.07, 6.06, 6.05, 6.04, 6.03, 6.02, 6.01, 6.00, 5.99, 5.98, 5.97, 5.96, 5.95, 5.94, 5.93, 5.92, 5.91, 5.90, 5.89, 5.88, 5.87, 5.86, 5.85, 5.84, 5.83, 5.82, 5.81, 5.80, 5.79, 5.78, 5.77, 5.76, 5.75, 5.74, 5.73, 5.72, 5.71, 5.70, 5.69, 5.68, 5.67, 5.66, 5.65, 5.64, 5.63, 5.62, 5.61, 5.60, 5.59, 5.58, 5.57, 5.56, 5.55, 5.54, 5.53, 5.52, 5.51, 5.50, 5.49, 5.48, 5.47, 5.46, 5.45, 5.44, 5.43, 5.42, 5.41, 5.40, 5.39, 5.38, 5.37, 5.36, 5.35, 5.34, 5.33, 5.32, 5.31, 5.30, 5.29, 5.28, 5.27, 5.26, 5.25, 5.24, 5.23, 5.22, 5.21, 5.20, 5.19, 5.18, 5.17, 5.16, 5.15, 5.14, 5.13, 5.12, 5.11, 5.10, 5.09, 5.08, 5.07, 5.06, 5.05, 5.04, 5.03, 5.02, 5.01, 5.00, 4.99, 4.98, 4.97, 4.96, 4.95, 4.94, 4.93, 4.92, 4.91, 4.90, 4.89, 4.88, 4.87, 4.86, 4.85, 4.84, 4.83, 4.82, 4.81, 4.80, 4.79, 4.78, 4.77, 4.76, 4.75, 4.74, 4.73, 4.72, 4.71, 4.70, 4.69, 4.68, 4.67, 4.66, 4.65, 4.64, 4.63, 4.62, 4.61, 4.60, 4.59, 4.58, 4.57, 4.56, 4.55, 4.54, 4.53, 4.52, 4.51, 4.50, 4.49, 4.48, 4.47, 4.46, 4.45, 4.44, 4.43, 4.42, 4.41, 4.40, 4.39, 4.38, 4.37, 4.36, 4.35, 4.34, 4.33, 4.32, 4.31, 4.30, 4.29, 4.28, 4.27, 4.26, 4.25, 4.24, 4.23, 4.22, 4.21, 4.20, 4.19, 4.18, 4.17, 4.16, 4.15, 4.14, 4.13, 4.12, 4.11, 4.10, 4.09, 4.08, 4.07, 4.06, 4.05, 4.04, 4.03, 4.02, 4.01, 4.00, 3.99, 3.98, 3.97, 3.96, 3.95, 3.94, 3.93, 3.92, 3.91, 3.90, 3.89, 3.88, 3.87, 3.86, 3.85, 3.84, 3.83, 3.82, 3.81, 3.80, 3.79, 3.78, 3.77, 3.76, 3.75, 3.74, 3.73, 3.72, 3.71, 3.70, 3.69, 3.68, 3.67, 3.66, 3.65, 3.64, 3.63, 3.62, 3.61, 3.60, 3.59, 3.58, 3.57, 3.56, 3.55, 3.54, 3.53, 3.52, 3.51, 3.50, 3.49, 3.48, 3.47, 3.46, 3.45, 3.44, 3.43, 3.42, 3.41, 3.40, 3.39, 3.38, 3.37, 3.36, 3.35, 3.34, 3.33, 3.32, 3.31, 3.30, 3.29, 3.28, 3.27, 3.26, 3.25, 3.24, 3.23, 3.22, 3.21, 3.20, 3.19, 3.18, 3.17, 3.16, 3.15, 3.14, 3.13, 3.12, 3.11, 3.10, 3.09, 3.08, 3.07, 3.06, 3.05, 3.04, 3.03, 3.02, 3.01, 3.00, 2.99, 2.98, 2.97, 2.96, 2.95, 2.94, 2.93, 2.92, 2.91, 2.90, 2.89, 2.88, 2.87, 2.86, 2.85, 2.84, 2.83, 2.82, 2.81, 2.80, 2.79, 2.78, 2.77, 2.76, 2.75, 2.74, 2.73, 2.72, 2.71, 2.70, 2.69, 2.68, 2.67, 2.66, 2.65, 2.64, 2.63, 2.62, 2.61, 2.60, 2.59, 2.58, 2.57, 2.56, 2.55, 2.54, 2.53, 2.52, 2.51, 2.50, 2.49, 2.48, 2.47, 2.46, 2.45, 2.44, 2.43, 2.42, 2.41, 2.40, 2.39, 2.38, 2.37, 2.36, 2.35, 2.34, 2.33, 2.32, 2.31, 2.30, 2.29, 2.28, 2.27, 2.26, 2.25, 2.24, 2.23, 2.22, 2.21, 2.20, 2.19, 2.18, 2.17, 2.16, 2.15, 2.14, 2.13, 2.12, 2.11, 2.10, 2.09, 2.08, 2.07, 2.06, 2.05, 2.04, 2.03, 2.02, 2.01, 2.00, 1.99, 1.98, 1.97, 1.96, 1.95, 1.94, 1.93, 1.92, 1.91, 1.90, 1.89, 1.88, 1.87, 1.86, 1.85, 1.84, 1.83, 1.82, 1.81, 1.80, 1.79, 1.78, 1.77, 1.76, 1.75, 1.74, 1.73, 1.72, 1.71, 1.70, 1.69, 1.68, 1.67, 1.66, 1.65, 1.64, 1.63, 1.62, 1.61, 1.60, 1.59, 1.58, 1.57, 1.56, 1.55, 1.54, 1.53, 1.52, 1.51, 1.50, 1.49, 1.48, 1.47, 1.46, 1.45, 1.44, 1.43, 1.42, 1.41, 1.40, 1.39, 1.38, 1.37, 1.36, 1.35, 1.34, 1.33, 1.32, 1.31, 1.30, 1.29, 1.28, 1.27, 1.2

hwh-A-S55-CW

Chemical structure: CCCCCCCCOS(=O)(=O)c1ccccc1

13C NMR spectrum (ppm):

- 139.2
- 133.7
- 129.3
- 126.1
- 56.35
- 31.88
- 29.47
- 29.27
- 29.04
- 28.30
- 22.71
- 22.67
- 14.17

Chemical structure: CCCCCCCCOS(=O)(=O)c1ccccc1

13C NMR spectrum (ppm):

- 139.2
- 133.7
- 129.3
- 126.1
- 56.35
- 31.88
- 29.47
- 29.27
- 29.04
- 28.30
- 22.71
- 22.67
- 14.17

**$^1\text{H}$  NMR Spectrum of 5 ( $\text{CDCl}_3$  as solvent, 400 MHz)**

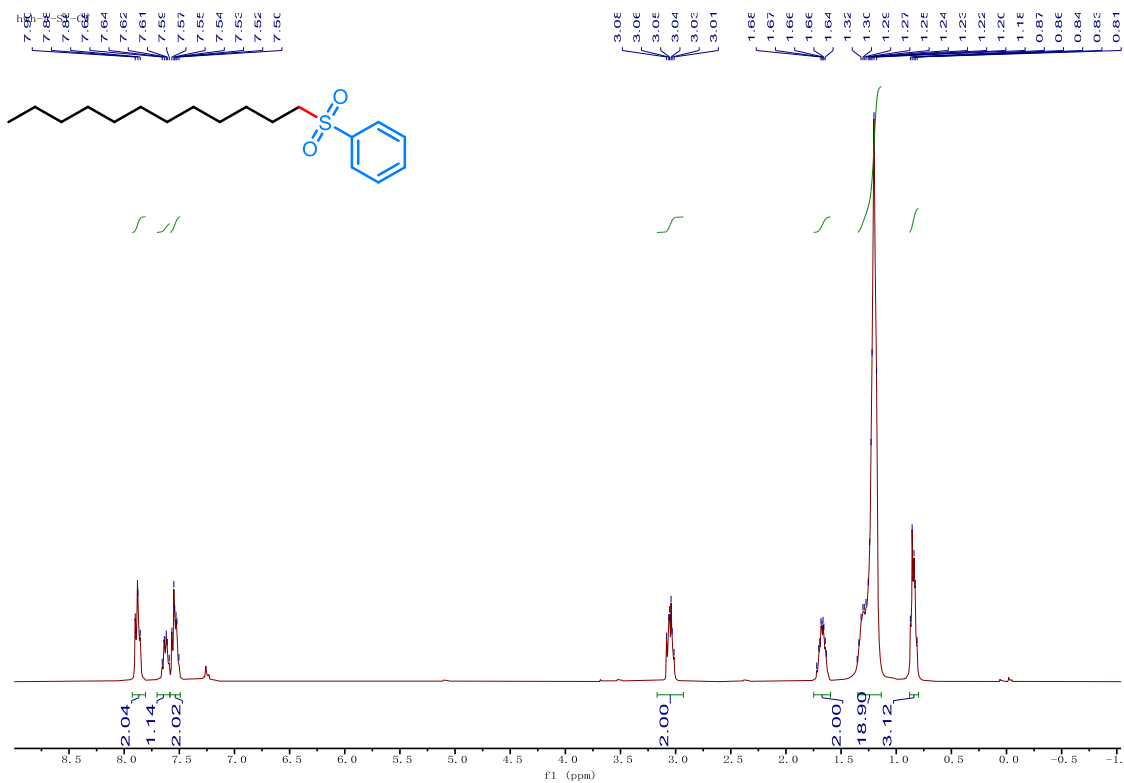

**$^{13}\text{C}$  ( $^1\text{H}$ ) NMR Spectrum of 5 ( $\text{CDCl}_3$  as solvent, 101 MHz)**

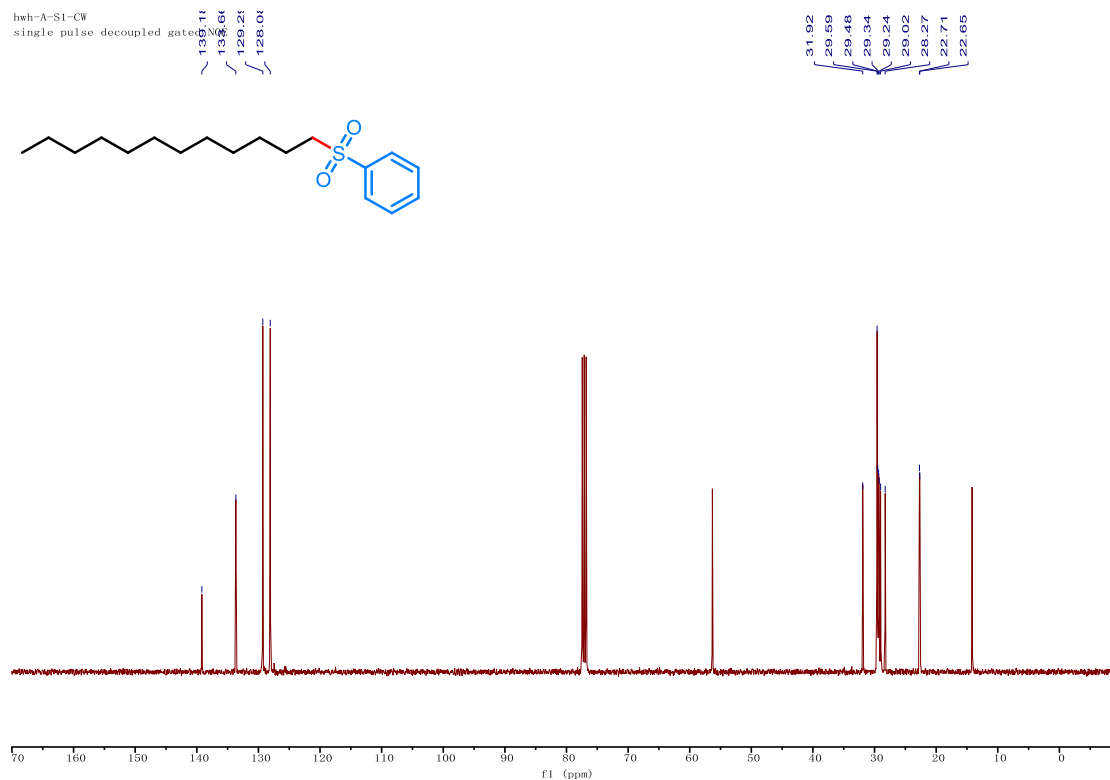



**$^1\text{H}$  NMR Spectrum of 6 ( $\text{CDCl}_3$  as solvent, 400 MHz)**

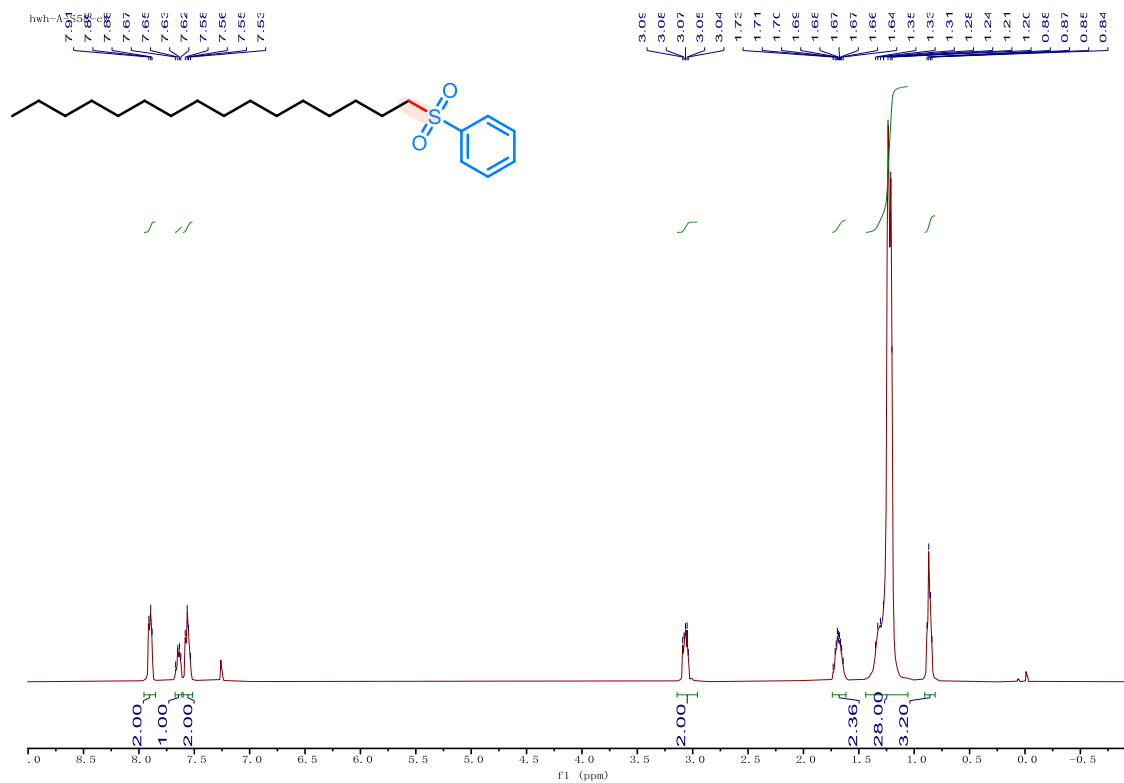

**$^{13}\text{C}$   $\{^1\text{H}\}$  NMR Spectrum of 6 ( $\text{CDCl}_3$  as solvent, 101 MHz)**

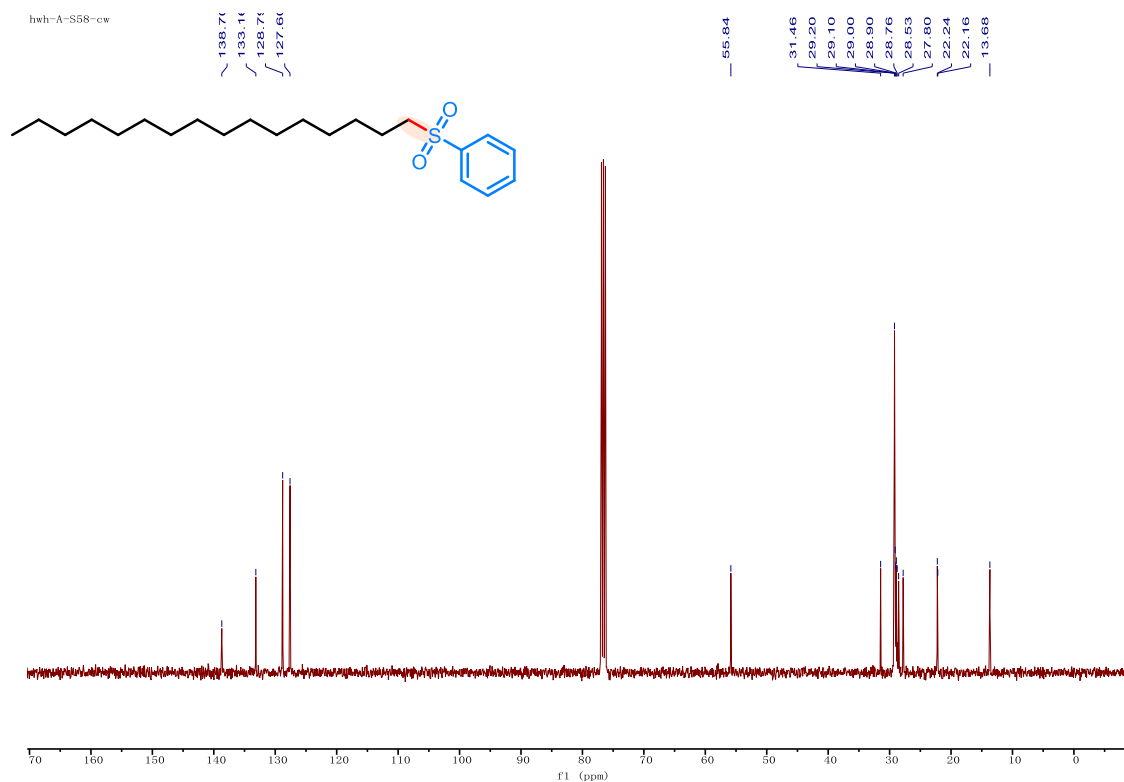

**<sup>1</sup>H NMR Spectrum of 7 (CDCl<sub>3</sub> as solvent, 400 MHz)**

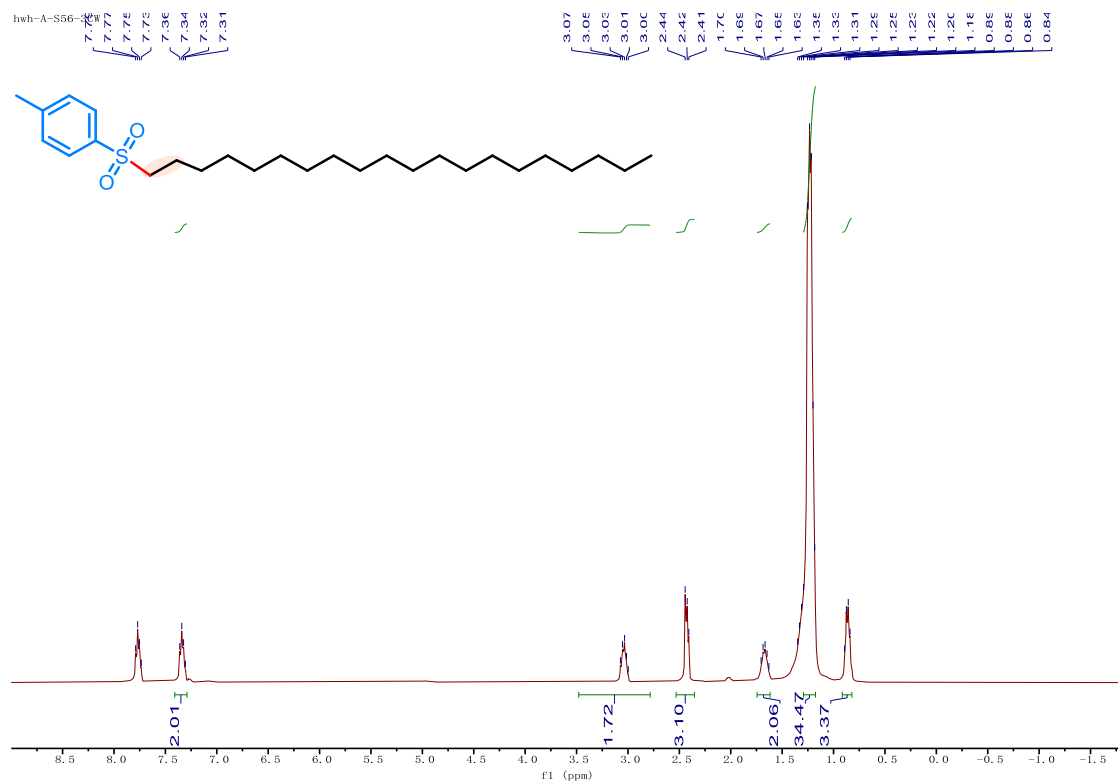

**<sup>13</sup>C {<sup>1</sup>H} NMR Spectrum of 7 (CDCl<sub>3</sub> as solvent, 101 MHz)**

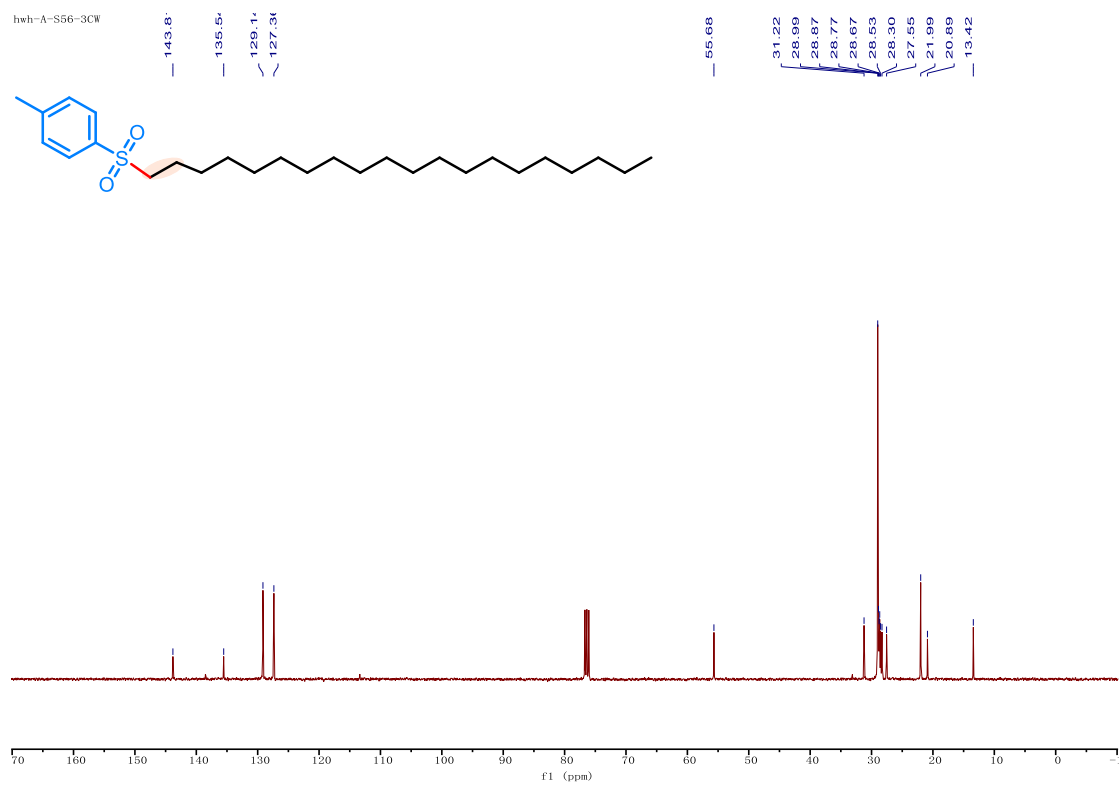

# <sup>1</sup>H NMR Spectrum of 8 (CDCl<sub>3</sub> as solvent, 400 MHz)

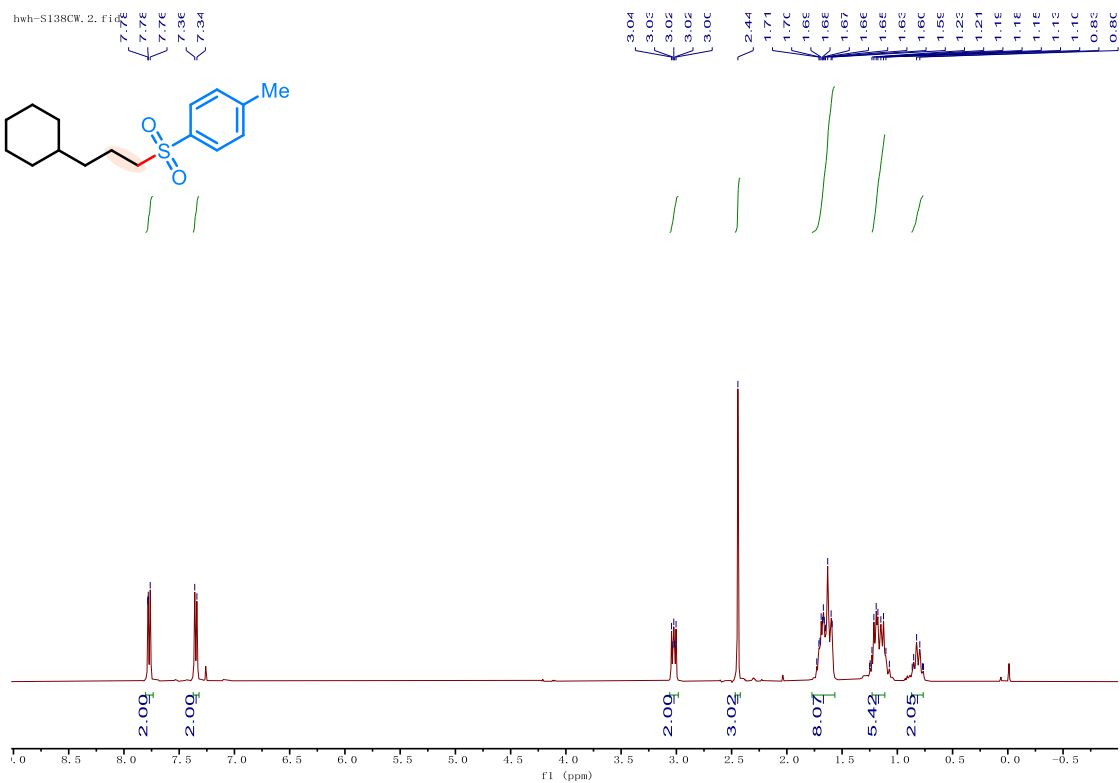

# <sup>13</sup>C {<sup>1</sup>H} NMR Spectrum of 8 (CDCl<sub>3</sub> as solvent, 101 MHz)

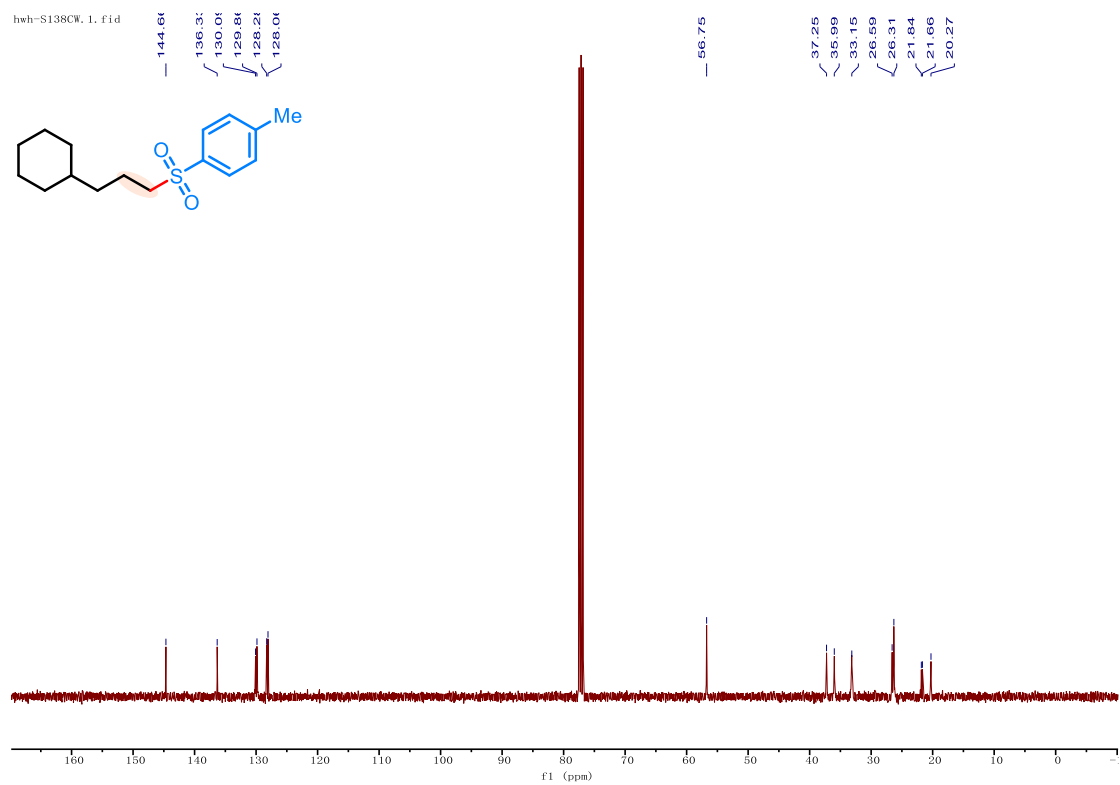

**$^1\text{H}$  NMR Spectrum of 9 ( $\text{CDCl}_3$  as solvent, 400 MHz)**

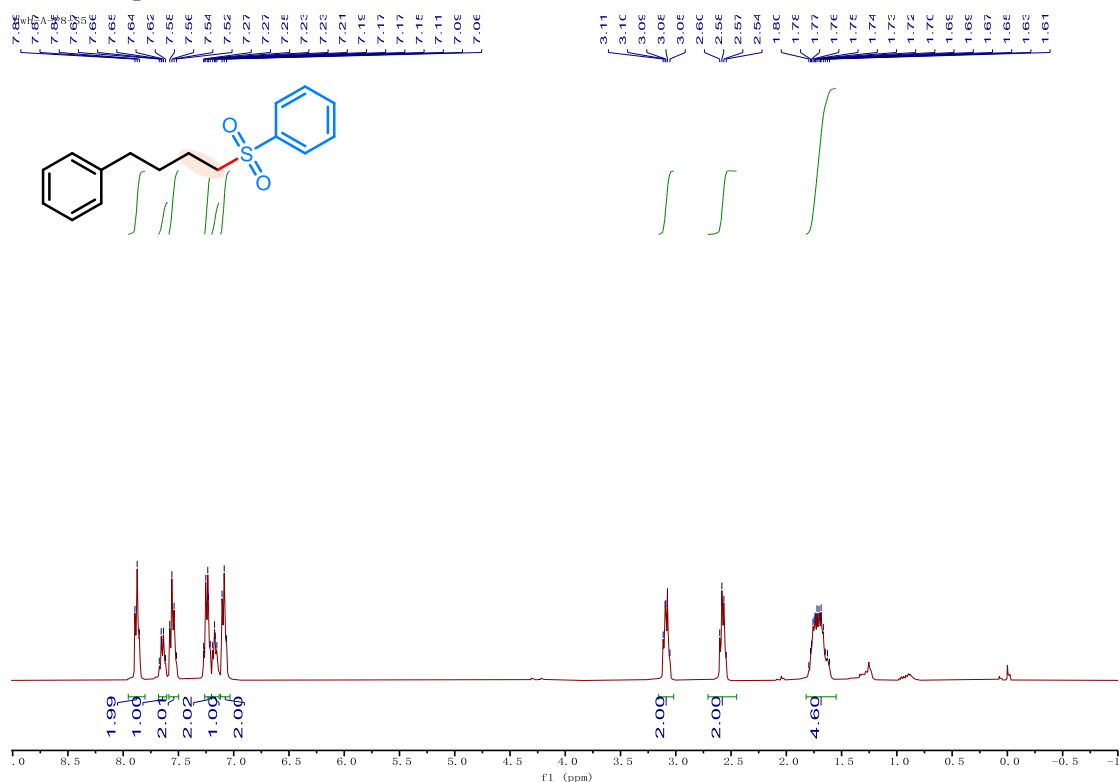

**$^{13}\text{C}$   $\{^1\text{H}\}$  NMR Spectrum of 9 ( $\text{CDCl}_3$  as solvent, 101 MHz)**

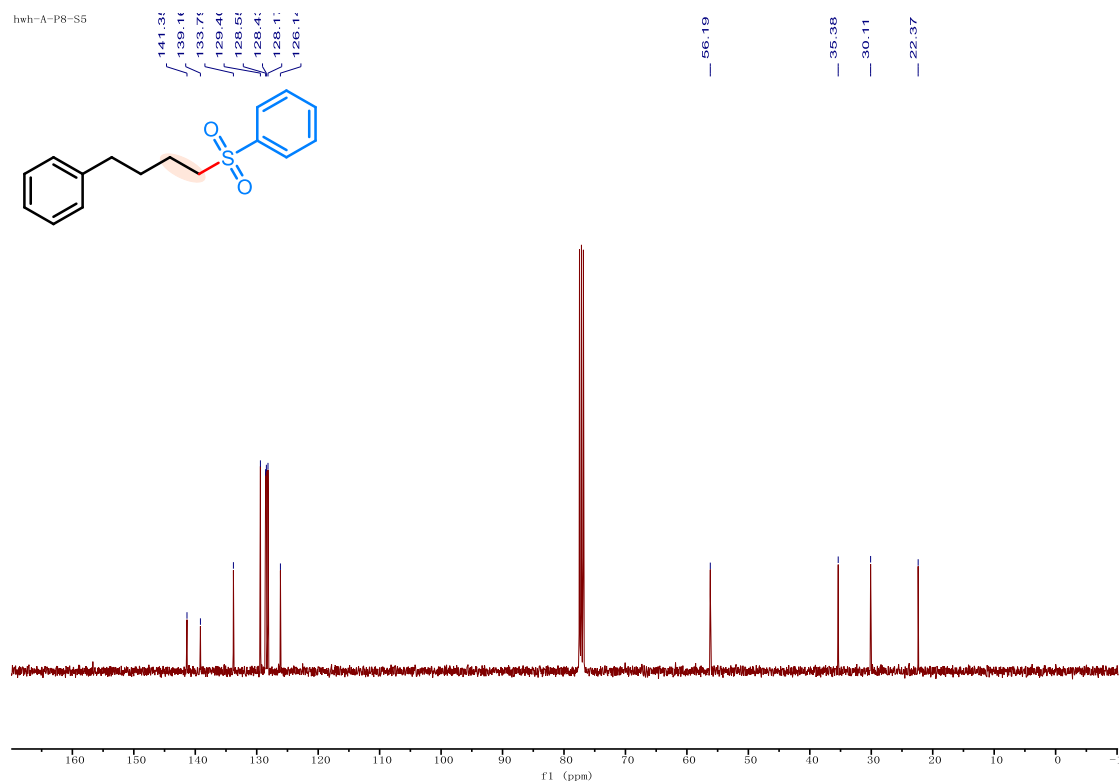

**$^1\text{H}$  NMR Spectrum of 10 ( $\text{CDCl}_3$  as solvent, 400 MHz)**

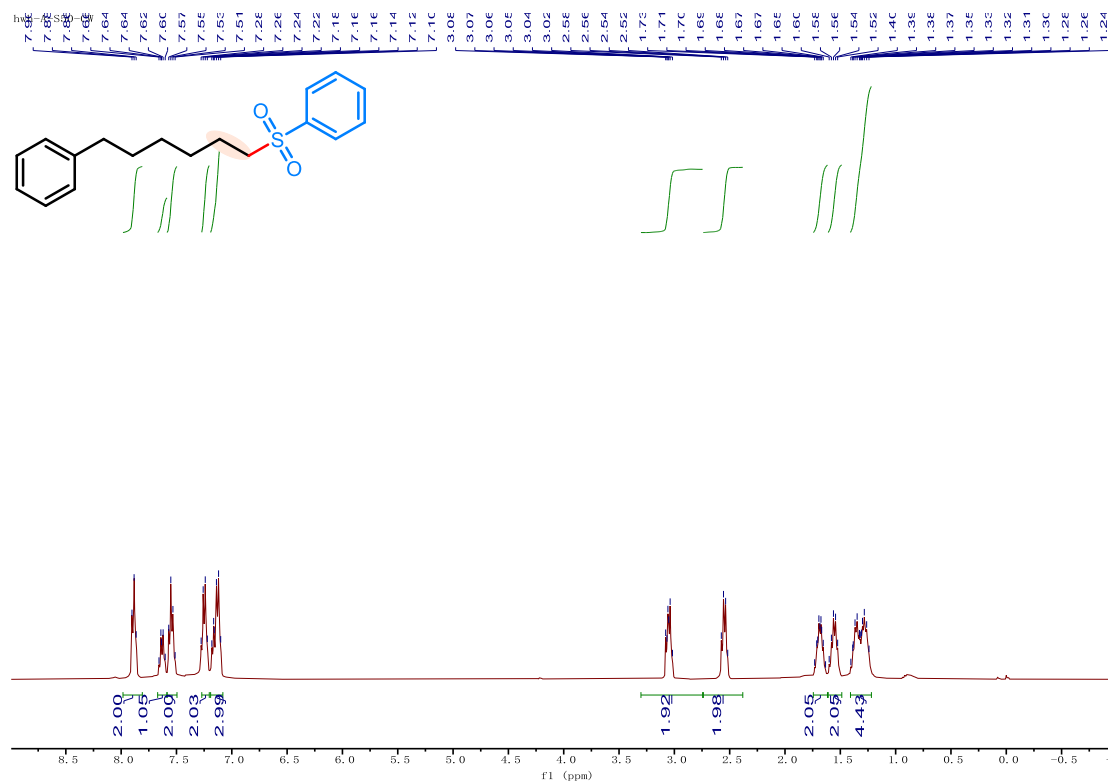

**$^{13}\text{C}$   $\{^1\text{H}\}$  NMR Spectrum of 10 ( $\text{CDCl}_3$  as solvent, 101 MHz)**

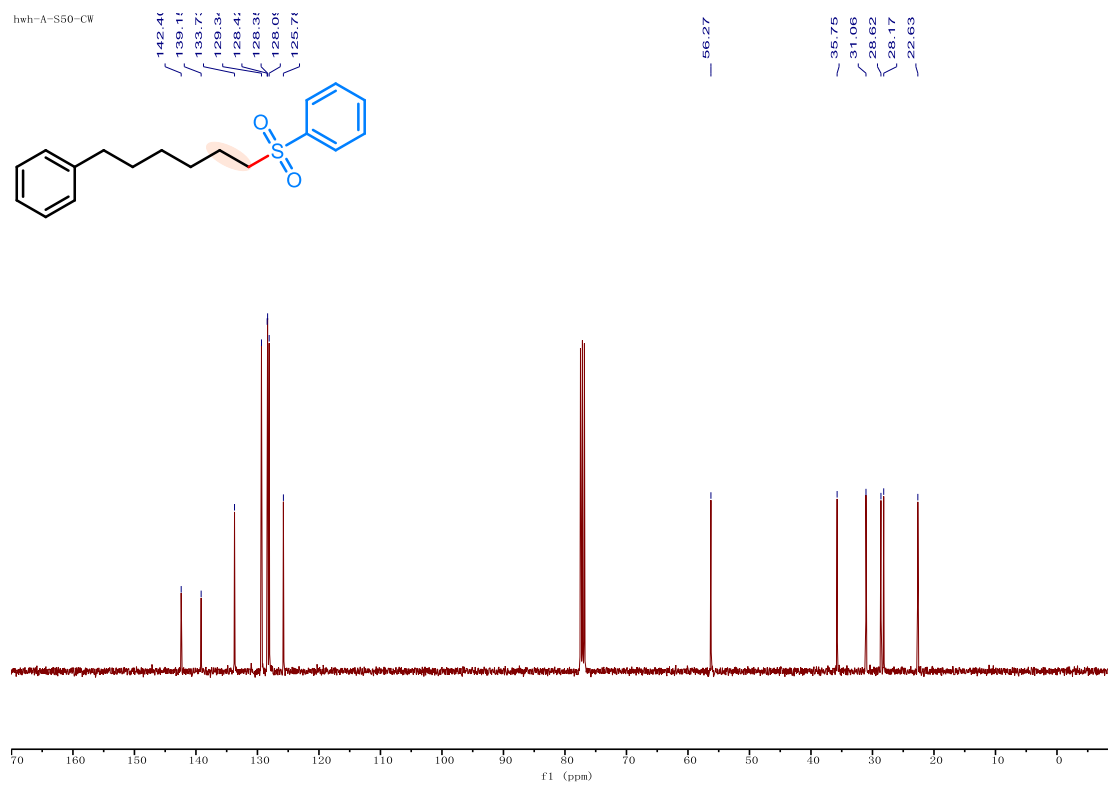

**<sup>1</sup>H NMR Spectrum of 11 (CDCl<sub>3</sub> as solvent, 400 MHz)**

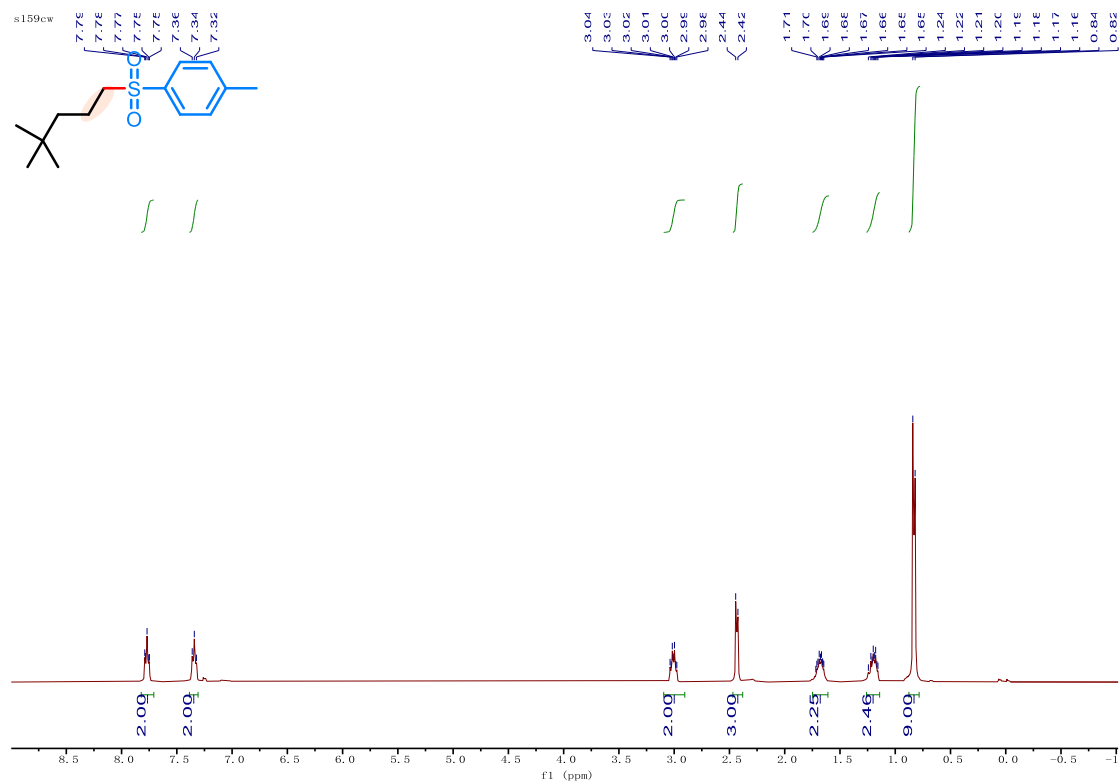

**<sup>13</sup>C {<sup>1</sup>H} NMR Spectrum of 11 (CDCl<sub>3</sub> as solvent, 101 MHz)**

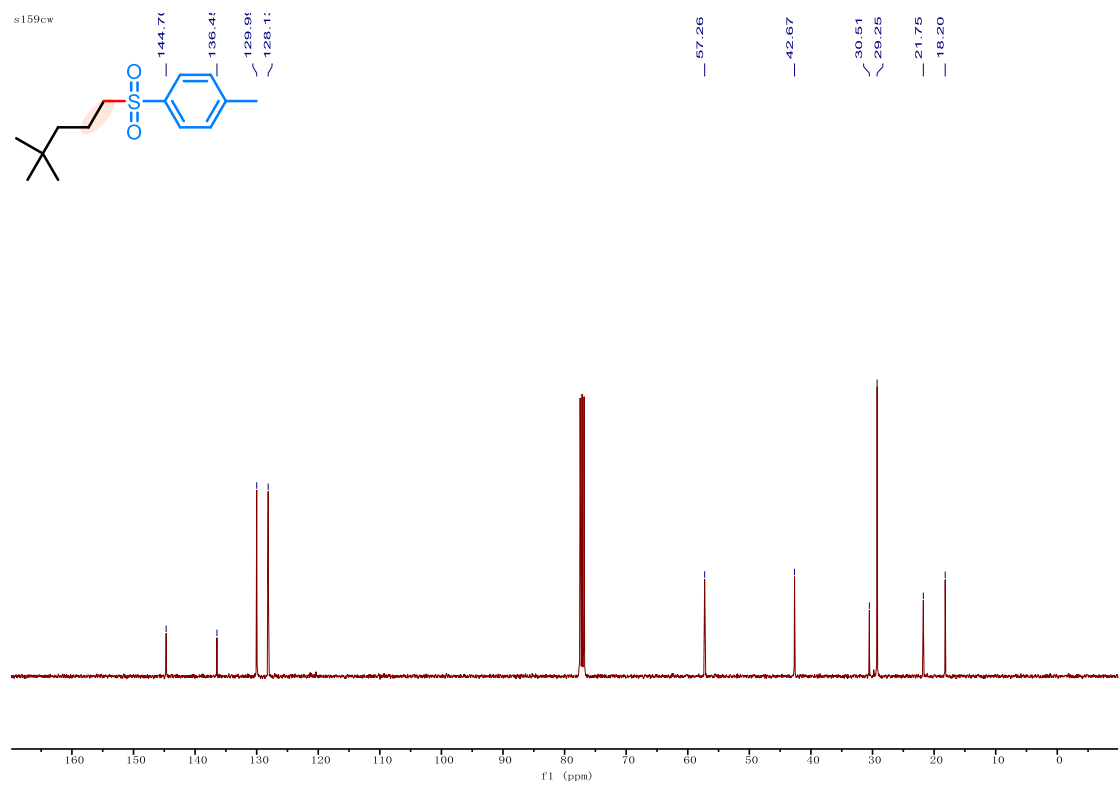

**<sup>1</sup>H NMR Spectrum of 12 (CDCl<sub>3</sub> as solvent, 400 MHz)**

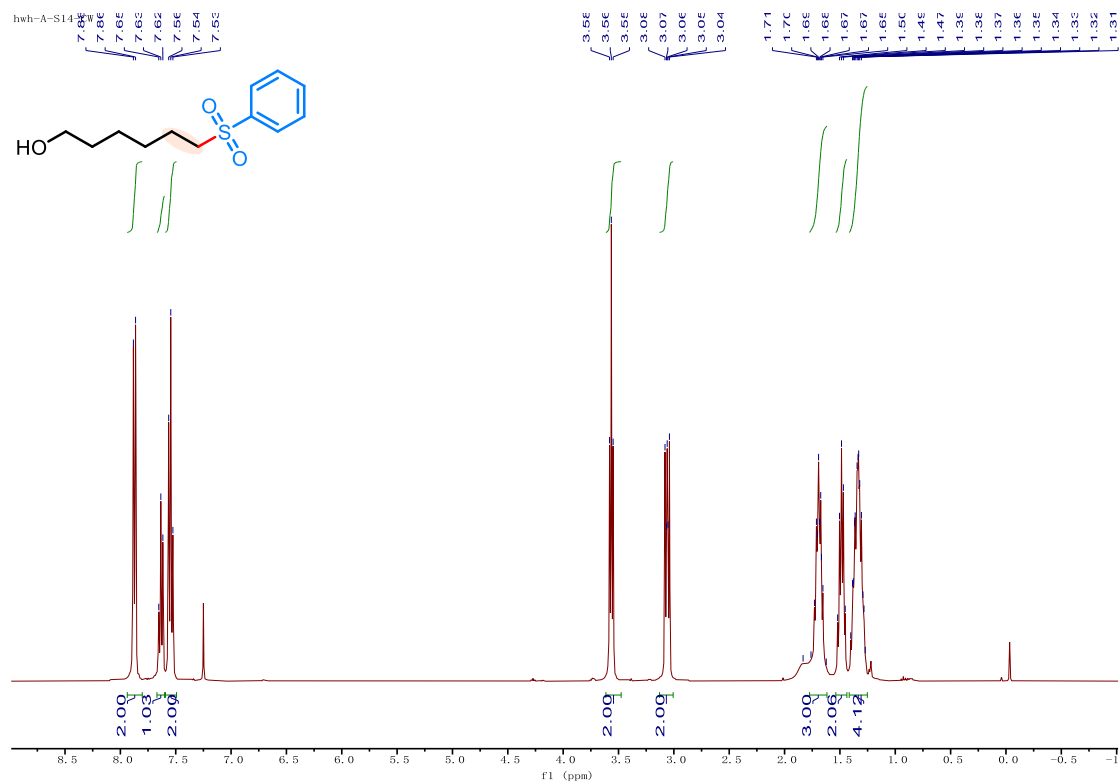

**<sup>13</sup>C {<sup>1</sup>H} NMR Spectrum of 12 (CDCl<sub>3</sub> as solvent, 151 MHz)**

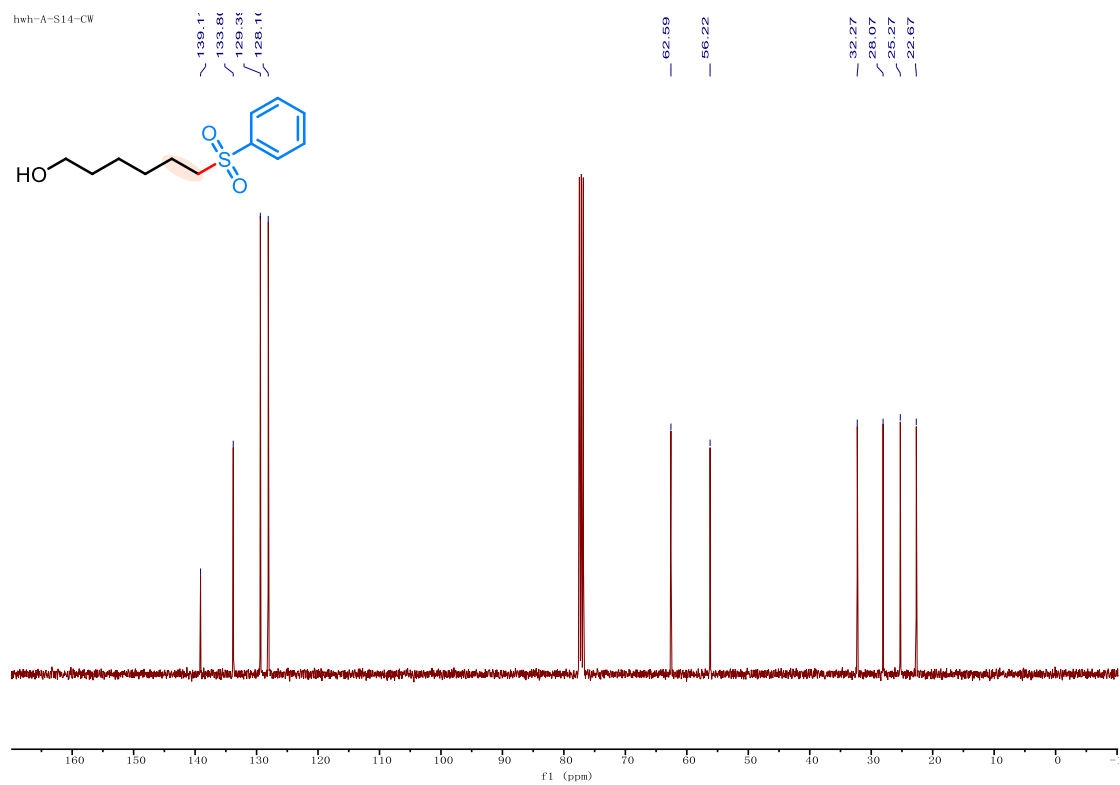

Chemical structure: OS(=O)(=O)CCCC(=O)O

<sup>1</sup>H NMR spectrum (DMSO-d<sub>6</sub>) showing peaks and integration values:

- Peak at ~8.0 ppm (integration 2.00)
- Peak at ~7.7 ppm (integration 1.10)
- Peak at ~7.5 ppm (integration 2.00)
- Peak at ~7.3 ppm (integration 2.00)
- Peak at ~3.1 ppm (integration 2.00)
- Peak at ~2.3 ppm (integration 2.10)
- Peak at ~2.1 ppm (integration 0.96)
- Peak at ~1.7 ppm (integration 4.14)

hwh-A-S181-CW

Chemical structure: OS(=O)(=O)CCCC(=O)O

<sup>13</sup>C NMR spectrum (f1 (ppm)) showing peaks at:

- 178.84
- 138.91
- 133.91
- 129.41
- 128.11
- 55.85
- 33.36
- 23.28
- 22.15

Chemical structure: OS(=O)(=O)CCCC(=O)O

<sup>13</sup>C NMR spectrum (f1 (ppm)) showing peaks at:

- 178.84
- 138.91
- 133.91
- 129.41
- 128.11
- 55.85
- 33.36
- 23.28
- 22.15



**$^1\text{H}$  NMR Spectrum of 14 ( $\text{CDCl}_3$  as solvent, 400 MHz)**

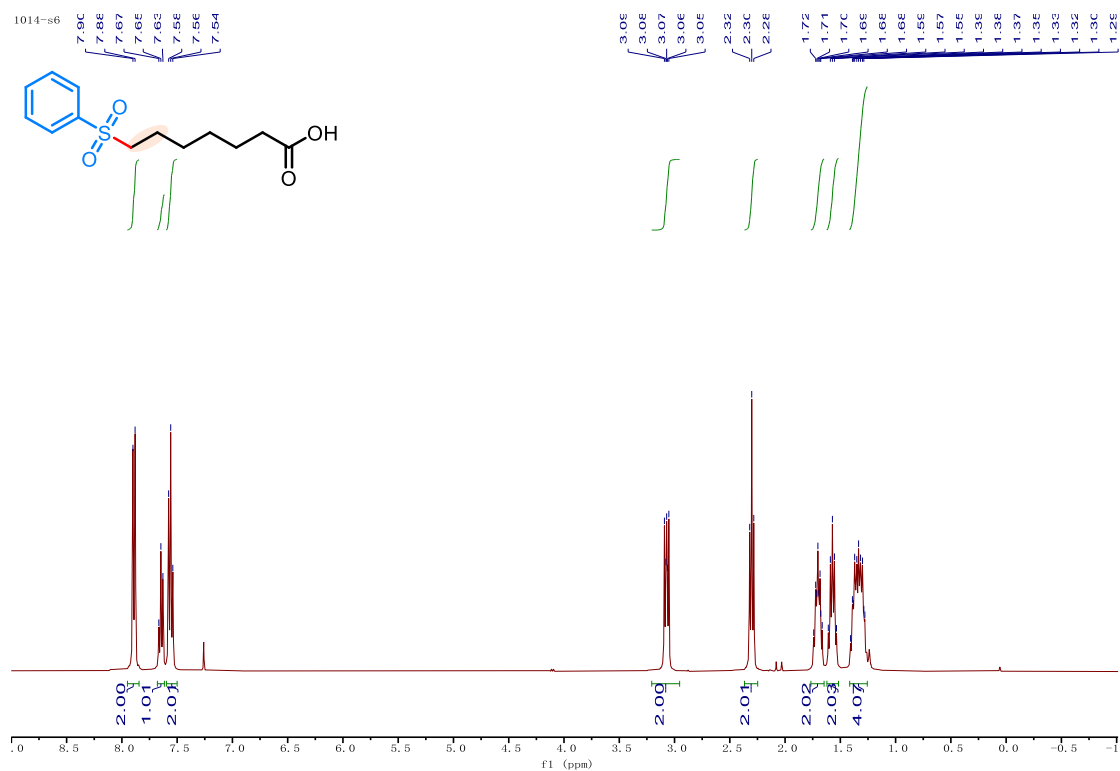

**$^{13}\text{C}$   $\{^1\text{H}\}$  NMR Spectrum of 14 ( $\text{CDCl}_3$  as solvent, 101 MHz)**

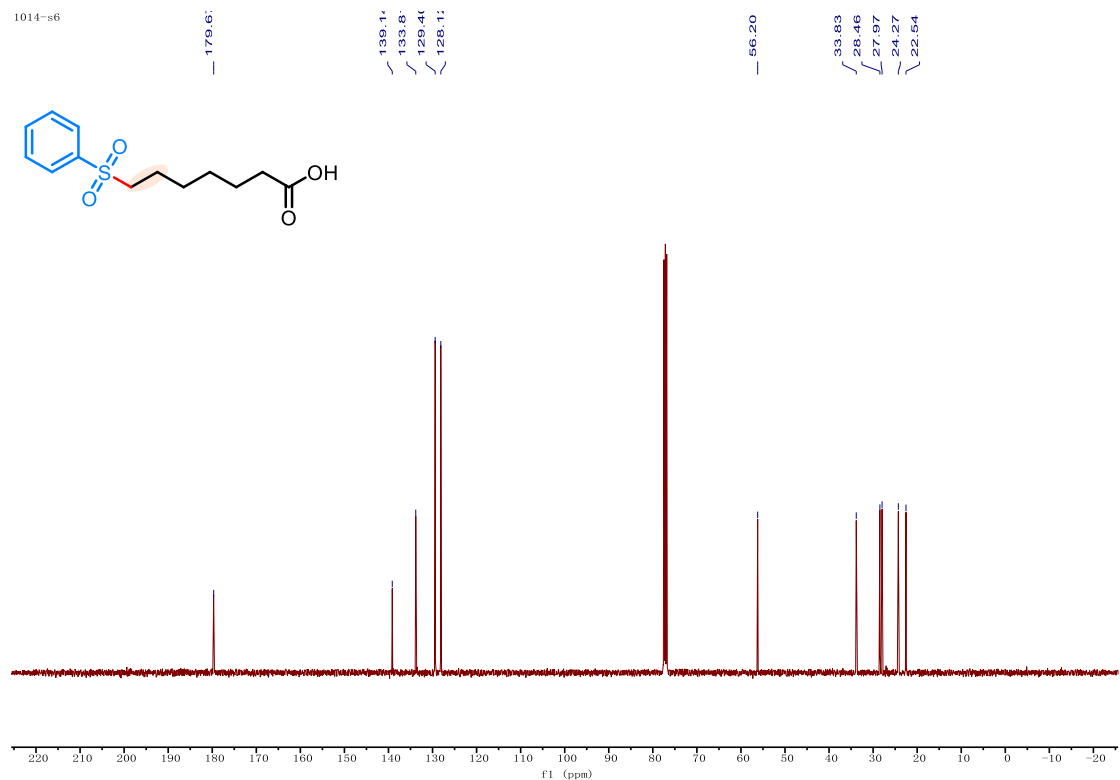

### <sup>1</sup>H NMR Spectrum of 15 (CDCl<sub>3</sub> as solvent, 400 MHz)

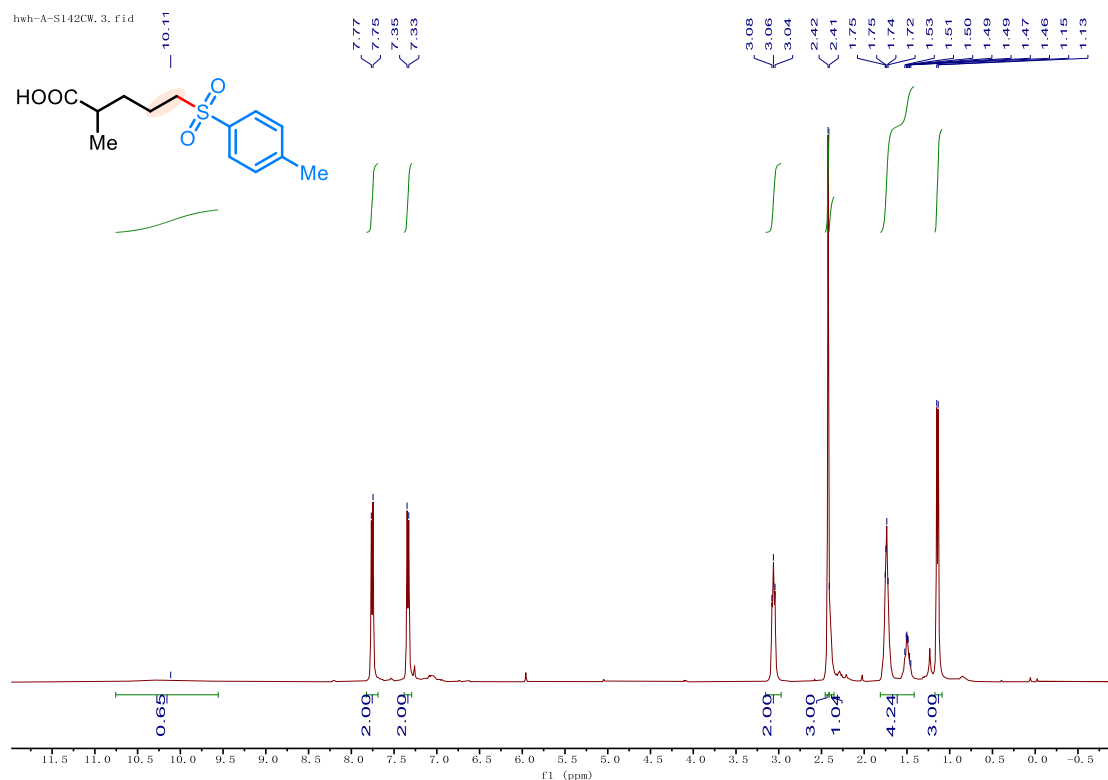

### <sup>13</sup>C {<sup>1</sup>H} NMR Spectrum of 15 (CDCl<sub>3</sub> as solvent, 101 MHz)

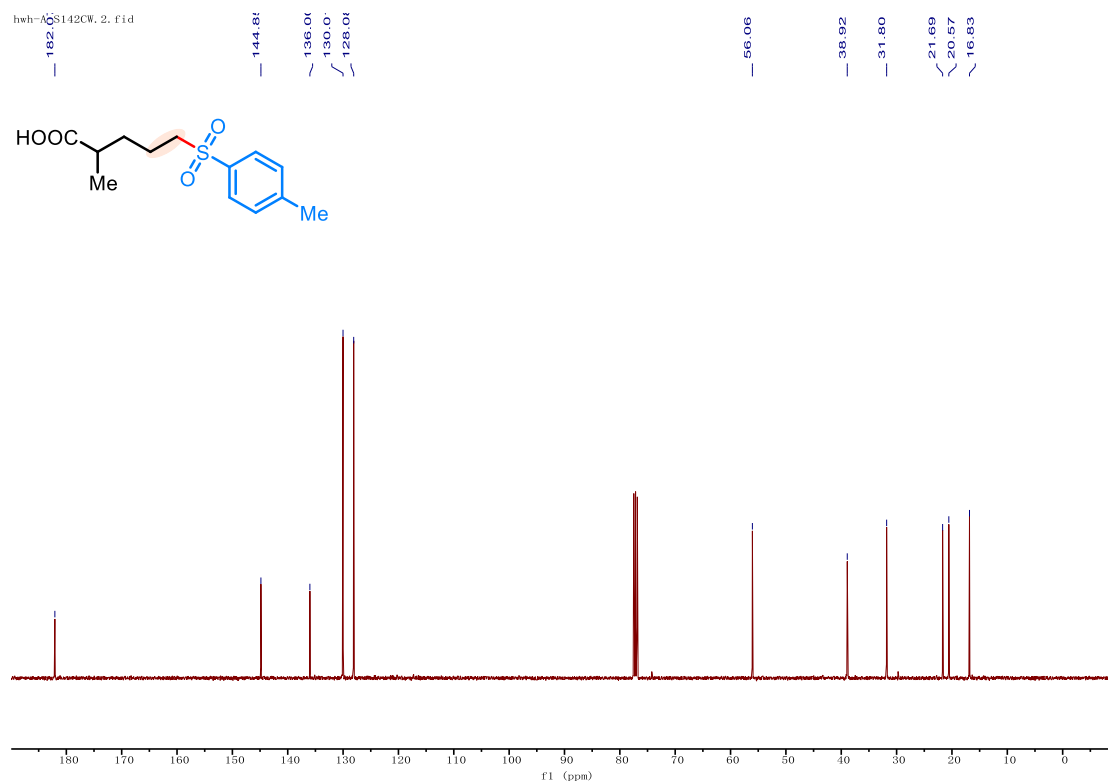

# <sup>1</sup>H NMR Spectrum of 16 (CDCl<sub>3</sub> as solvent, 600 MHz)

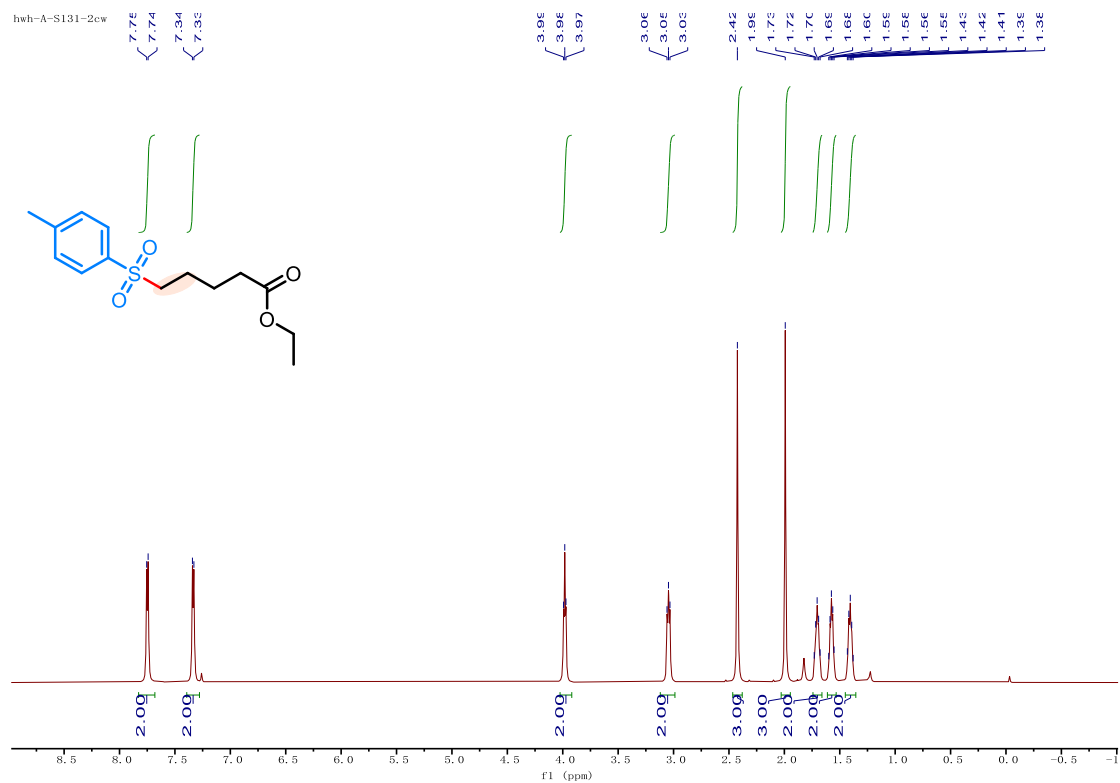

# <sup>13</sup>C {<sup>1</sup>H} NMR Spectrum of 16 (CDCl<sub>3</sub> as solvent, 151 MHz)

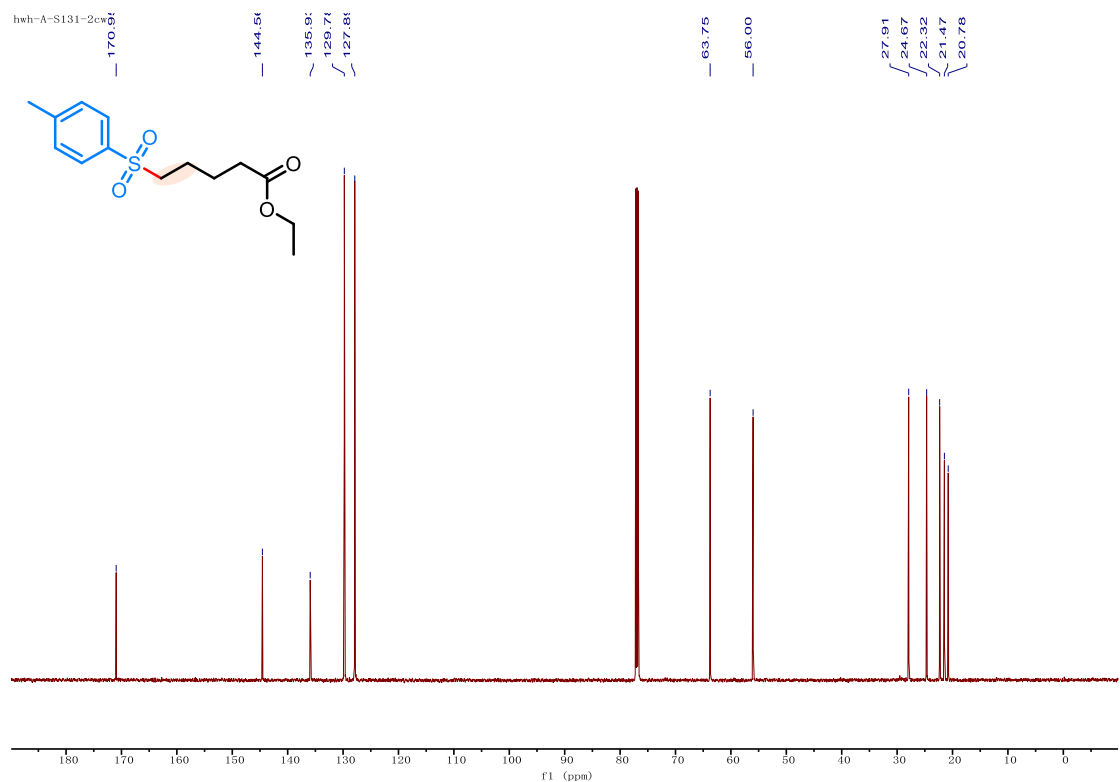

# <sup>1</sup>H NMR Spectrum of 17 (CDCl<sub>3</sub> as solvent, 400 MHz)

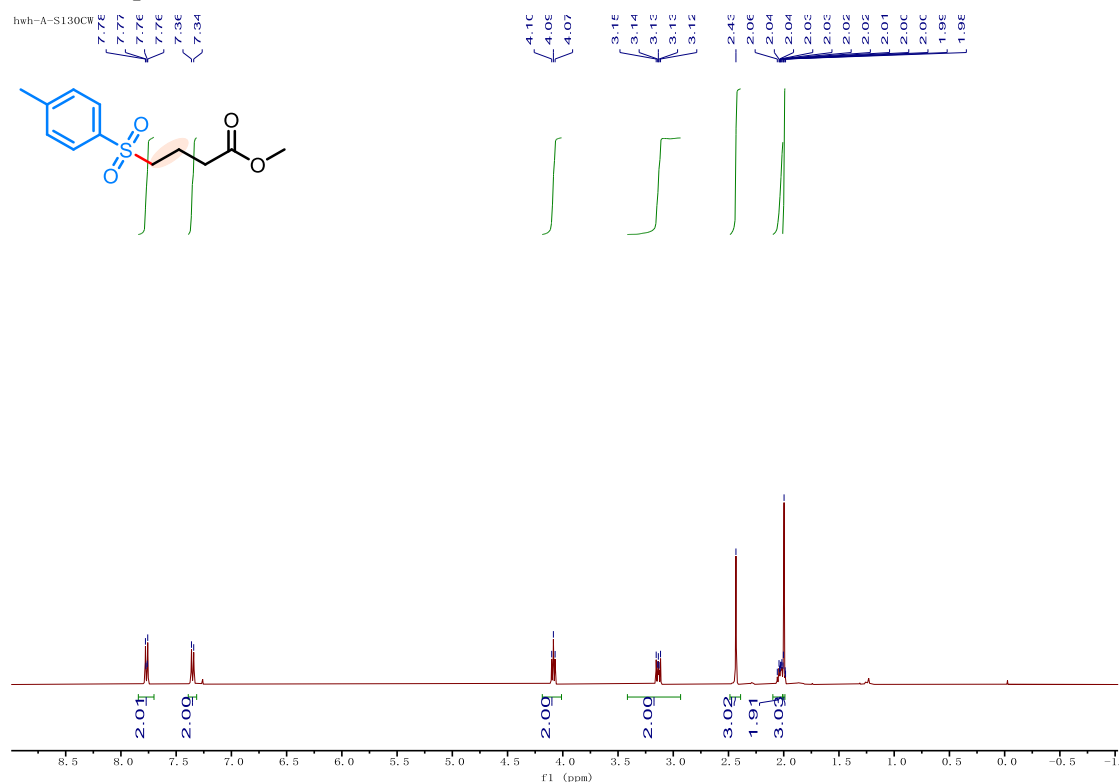

# <sup>13</sup>C {<sup>1</sup>H} NMR Spectrum of 17 (CDCl<sub>3</sub> as solvent, 101 MHz)

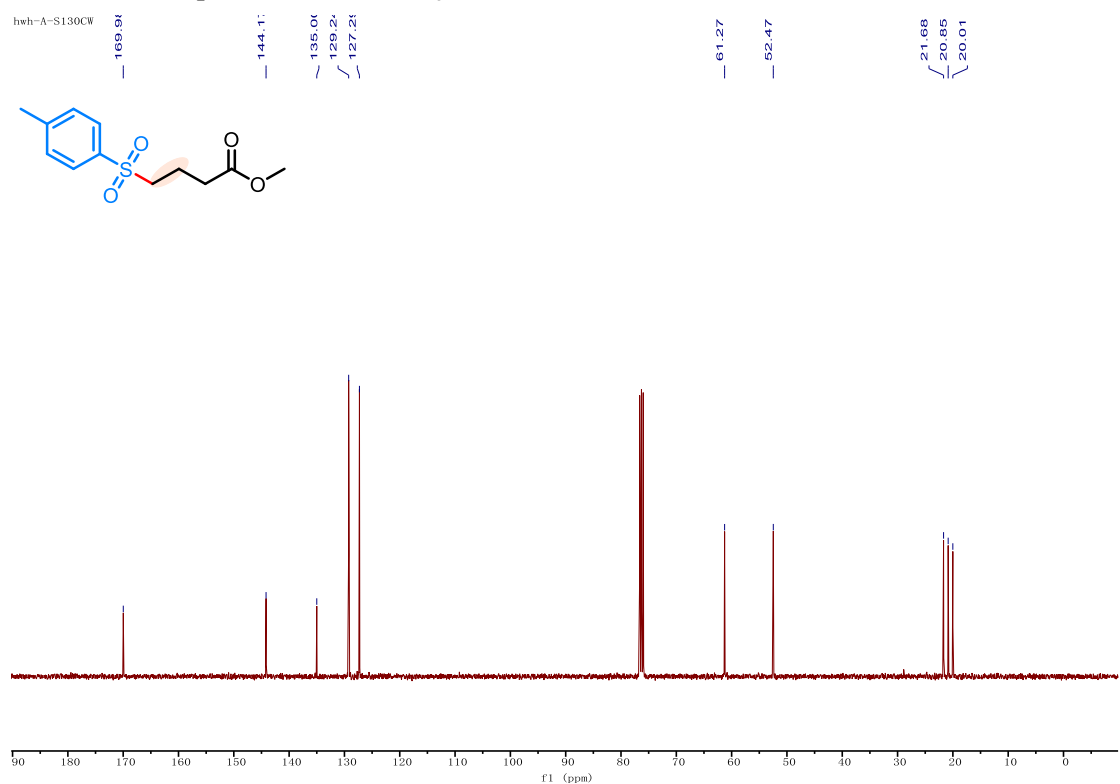

## hwh-A-S134CW

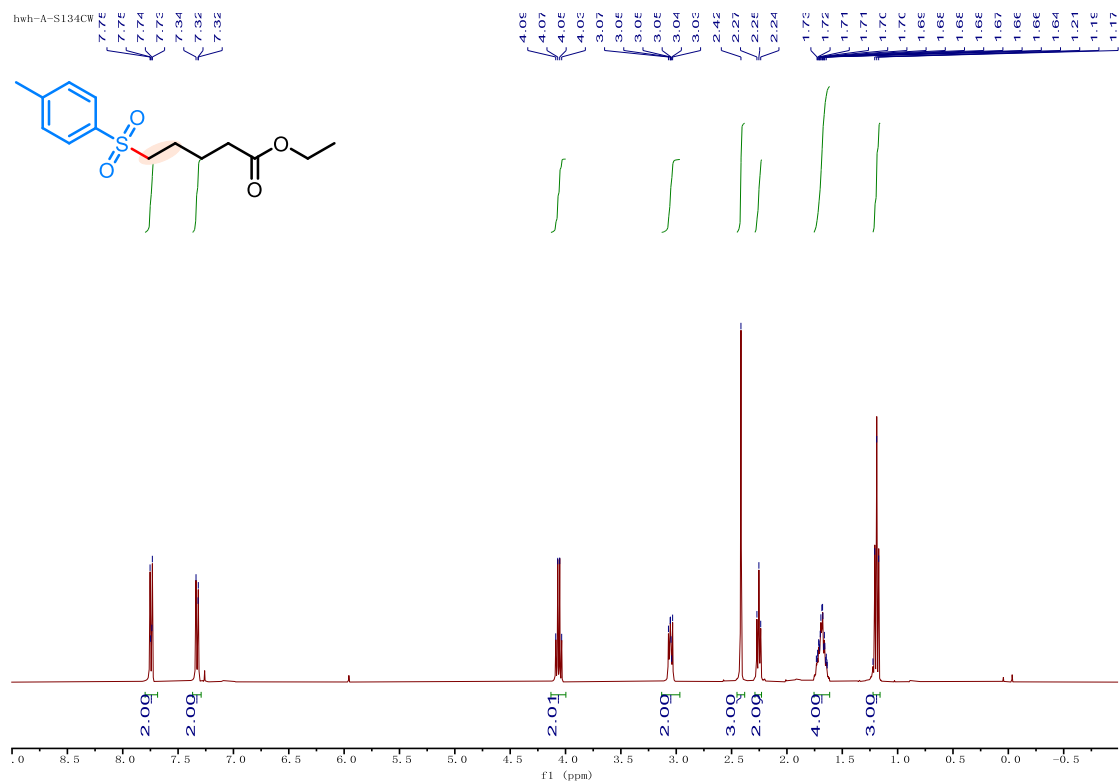

## hwh-A-S134CW 00

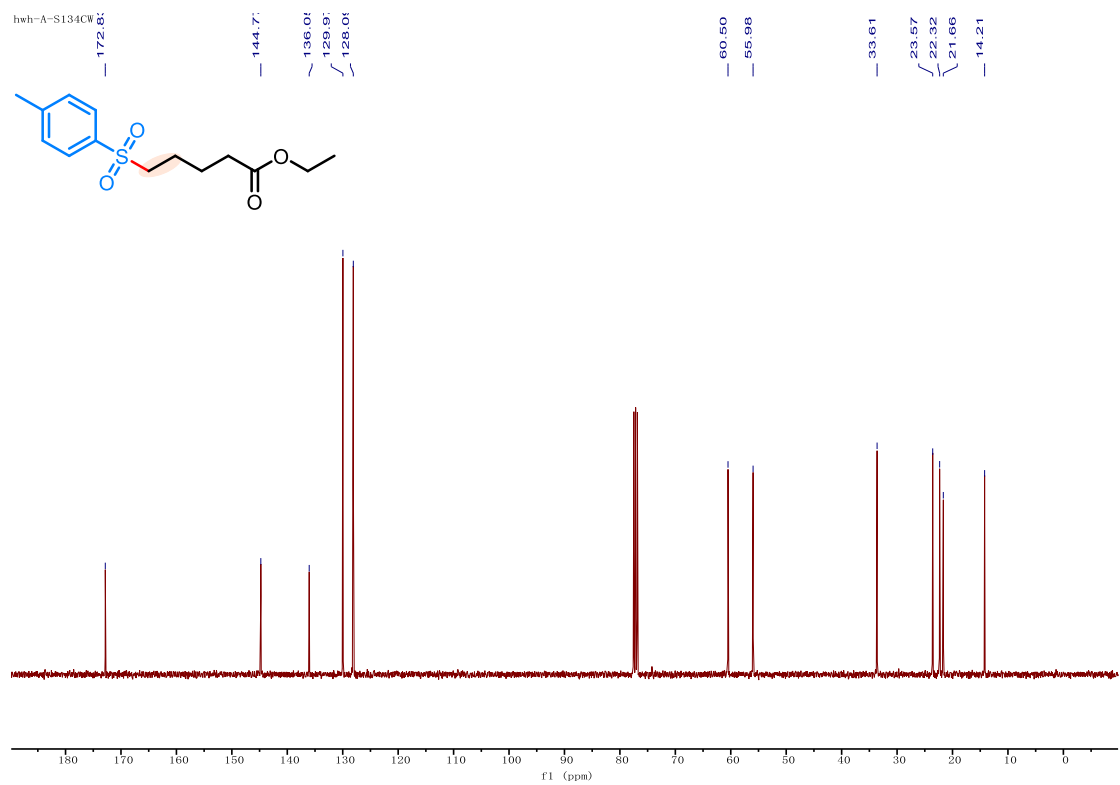

**$^1\text{H}$  NMR Spectrum of 19 ( $\text{CDCl}_3$  as solvent, 400 MHz)**

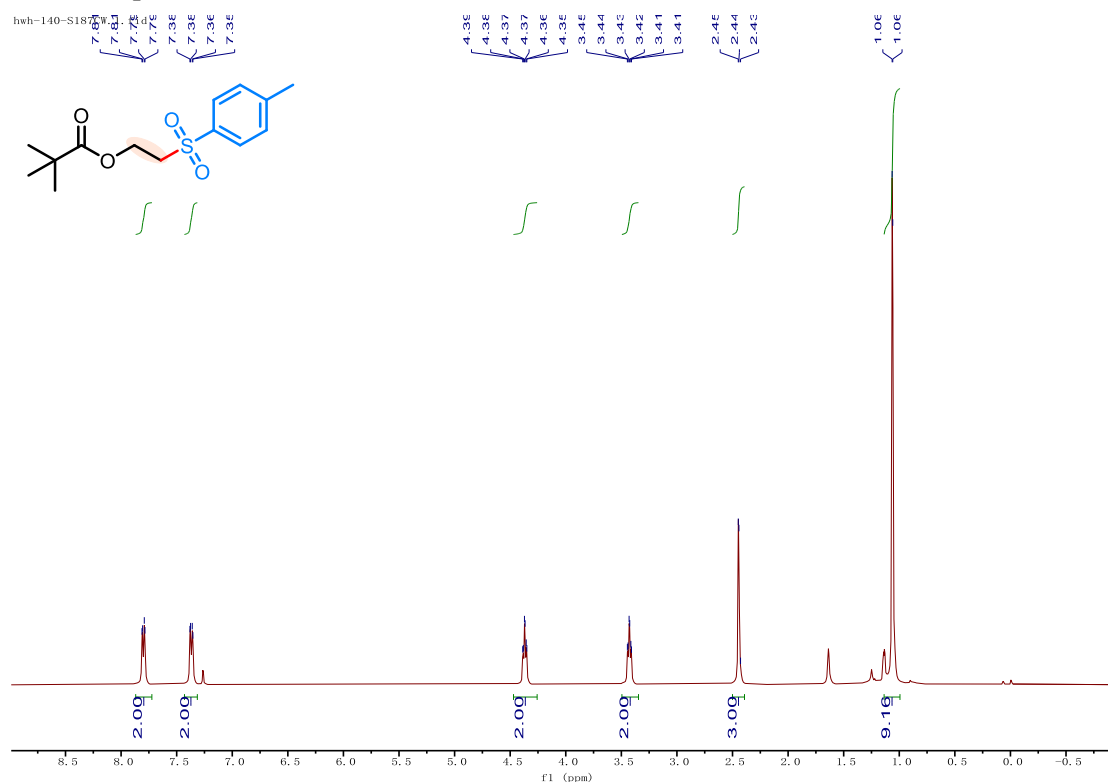

**$^{13}\text{C}$   $\{^1\text{H}\}$  NMR Spectrum of 19 ( $\text{CDCl}_3$  as solvent, 101 MHz)**

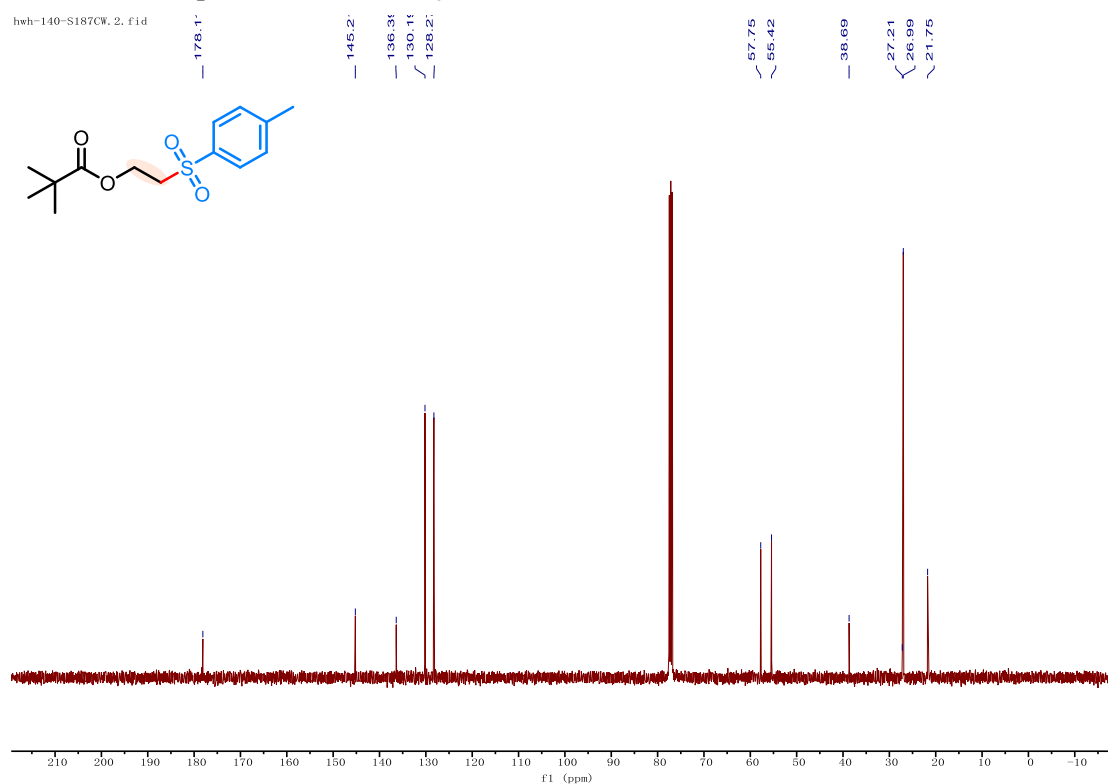

Chemical structure: CC(C)(C)N(Cc1ccc2ccccc2c1)C(=O)CCNS(=O)(=O)c3ccccc3

<sup>1</sup>H NMR spectrum (ppm):

- 7.86, 7.85, 7.84, 7.83, 7.82, 7.81, 7.80, 7.79, 7.78, 7.77, 7.76, 7.75, 7.74, 7.73, 7.72, 7.71, 7.70, 7.69, 7.68, 7.67, 7.66, 7.65, 7.64, 7.63, 7.62, 7.61, 7.60, 7.59, 7.58, 7.57, 7.56, 7.55, 7.54, 7.53, 7.52, 7.51, 7.50, 7.49, 7.48, 7.47, 7.46, 7.45, 7.44, 7.43, 7.42, 7.41, 7.40, 7.39, 7.38, 7.37, 7.36, 7.35, 7.34, 7.33, 7.32, 7.31, 7.30, 7.29, 7.28, 7.27, 7.26, 7.25, 7.24, 7.23, 7.22, 7.21, 7.20, 7.19, 7.18, 7.17, 7.16, 7.15, 7.14, 7.13, 7.12, 7.11, 7.10, 7.09, 7.08, 7.07, 7.06, 7.05, 7.04, 7.03, 7.02, 7.01, 7.00, 6.99, 6.98, 6.97, 6.96, 6.95, 6.94, 6.93, 6.92, 6.91, 6.90, 6.89, 6.88, 6.87, 6.86, 6.85, 6.84, 6.83, 6.82, 6.81, 6.80, 6.79, 6.78, 6.77, 6.76, 6.75, 6.74, 6.73, 6.72, 6.71, 6.70, 6.69, 6.68, 6.67, 6.66, 6.65, 6.64, 6.63, 6.62, 6.61, 6.60, 6.59, 6.58, 6.57, 6.56, 6.55, 6.54, 6.53, 6.52, 6.51, 6.50, 6.49, 6.48, 6.47, 6.46, 6.45, 6.44, 6.43, 6.42, 6.41, 6.40, 6.39, 6.38, 6.37, 6.36, 6.35, 6.34, 6.33, 6.32, 6.31, 6.30, 6.29, 6.28, 6.27, 6.26, 6.25, 6.24, 6.23, 6.22, 6.21, 6.20, 6.19, 6.18, 6.17, 6.16, 6.15, 6.14, 6.13, 6.12, 6.11, 6.10, 6.09, 6.08, 6.07, 6.06, 6.05, 6.04, 6.03, 6.02, 6.01, 6.00, 5.99, 5.98, 5.97, 5.96, 5.95, 5.94, 5.93, 5.92, 5.91, 5.90, 5.89, 5.88, 5.87, 5.86, 5.85, 5.84, 5.83, 5.82, 5.81, 5.80, 5.79, 5.78, 5.77, 5.76, 5.75, 5.74, 5.73, 5.72, 5.71, 5.70, 5.69, 5.68, 5.67, 5.66, 5.65, 5.64, 5.63, 5.62, 5.61, 5.60, 5.59, 5.58, 5.57, 5.56, 5.55, 5.54, 5.53, 5.52, 5.51, 5.50, 5.49, 5.48, 5.47, 5.46, 5.45, 5.44, 5.43, 5.42, 5.41, 5.40, 5.39, 5.38, 5.37, 5.36, 5.35, 5.34, 5.33, 5.32, 5.31, 5.30, 5.29, 5.28, 5.27, 5.26, 5.25, 5.24, 5.23, 5.22, 5.21, 5.20, 5.19, 5.18, 5.17, 5.16, 5.15, 5.14, 5.13, 5.12, 5.11, 5.10, 5.09, 5.08, 5.07, 5.06, 5.05, 5.04, 5.03, 5.02, 5.01, 5.00, 4.99, 4.98, 4.97, 4.96, 4.95, 4.94, 4.93, 4.92, 4.91, 4.90, 4.89, 4.88, 4.87, 4.86, 4.85, 4.84, 4.83, 4.82, 4.81, 4.80, 4.79, 4.78, 4.77, 4.76, 4.75, 4.74, 4.73, 4.72, 4.71, 4.70, 4.69, 4.68, 4.67, 4.66, 4.65, 4.64, 4.63, 4.62, 4.61, 4.60, 4.59, 4.58, 4.57, 4.56, 4.55, 4.54, 4.53, 4.52, 4.51, 4.50, 4.49, 4.48, 4.47, 4.46, 4.45, 4.44, 4.43, 4.42, 4.41, 4.40, 4.39, 4.38, 4.37, 4.36, 4.35, 4.34, 4.33, 4.32, 4.31, 4.30, 4.29, 4.28, 4.27, 4.26, 4.25, 4.24, 4.23, 4.22, 4.21, 4.20, 4.19, 4.18, 4.17, 4.16, 4.15, 4.14, 4.13, 4.12, 4.11, 4.10, 4.09, 4.08, 4.07, 4.06, 4.05, 4.04, 4.03, 4.02, 4.01, 4.00, 3.99, 3.98, 3.97, 3.96, 3.95, 3.94, 3.93, 3.92, 3.91, 3.90, 3.89, 3.88, 3.87, 3.86, 3.85, 3.84, 3.83, 3.82, 3.81, 3.80, 3.79, 3.78, 3.77, 3.76, 3.75, 3.74, 3.73, 3.72, 3.71, 3.70, 3.69, 3.68, 3.67, 3.66, 3.65, 3.64, 3.63, 3.62, 3.61, 3.60, 3.59, 3.58, 3.57, 3.56, 3.55, 3.54, 3.53, 3.52, 3.51, 3.50, 3.49, 3.48, 3.47, 3.46, 3.45, 3.44, 3.43, 3.42, 3.41, 3.40, 3.39, 3.38, 3.37, 3.36, 3.35, 3.34, 3.33, 3.32, 3.31, 3.30, 3.29, 3.28, 3.27, 3.26, 3.25, 3.24, 3.23, 3.22, 3.21, 3.20, 3.19, 3.18, 3.17, 3.16, 3.15, 3.14, 3.13, 3.12, 3.11, 3.10, 3.09, 3.08, 3.07, 3.06, 3.05, 3.04, 3.03, 3.02, 3.01, 3.00, 2.99, 2.98, 2.97, 2.96, 2.95, 2.94, 2.93, 2.92, 2.91, 2.90, 2.89, 2.88, 2.87, 2.86, 2.85, 2.84, 2.83, 2.82, 2.81, 2.80, 2.79, 2.78, 2.77, 2.76, 2.75, 2.74, 2.73, 2.72, 2.71, 2.70, 2.69, 2.68, 2.67, 2.66, 2.65, 2.64, 2.63, 2.62, 2.61, 2.60, 2.59, 2.58, 2.57, 2.56, 2.55, 2.54, 2.53, 2.52, 2.51, 2.50, 2.49, 2.48, 2.47, 2.46, 2.45, 2.44, 2.43, 2.42, 2.41, 2.40, 2.39, 2.38, 2.37, 2.36, 2.35, 2.34, 2.33, 2.32, 2.31, 2.30, 2.29, 2.28, 2.27, 2.26, 2.25, 2.24, 2.23, 2.22, 2.21, 2.20, 2.19, 2.18, 2.17, 2.16, 2.15, 2.14, 2.13, 2.12, 2.11, 2.10, 2.09, 2.08, 2.07, 2.06, 2.05, 2.04, 2.03, 2.02, 2.01, 2.00, 1.99, 1.98, 1.97, 1.96, 1.95, 1.94, 1.93, 1.92, 1.91, 1.90, 1.89, 1.88, 1.87, 1.86, 1.85, 1.84, 1.83, 1.82, 1.81, 1.80, 1.79, 1.78, 1.77, 1.76, 1.75, 1.74, 1.73, 1.72, 1.71, 1.70, 1.69, 1.68, 1.67, 1.66, 1.65, 1.64, 1.63, 1.62, 1.61, 1.60, 1.59, 1.58, 1.57, 1.56, 1.5

hwh-A-S42-1C8

173.38

138.94  
136.71  
133.67  
133.41  
132.64  
129.21  
128.71  
128.02  
127.74  
127.71  
126.51  
126.98  
123.97  
123.71

57.97  
56.09  
48.77

35.00  
28.77  
24.10  
22.36

CCCC(=O)N(Cc1ccc2ccccc2c1)S(=O)(=O)c3ccccc3

173.38

138.94  
136.71  
133.67  
133.41  
132.64  
129.21  
128.71  
128.02  
127.74  
127.71  
126.51  
126.98  
123.97  
123.71

57.97  
56.09  
48.77

35.00  
28.77  
24.10  
22.36

90 180 170 160 150 140 130 120 110 100 90 80 70 60 50 40 30 20 10 0

f1 (ppm)

**<sup>1</sup>H NMR Spectrum of 21 (CDCl<sub>3</sub> as solvent, 600 MHz)**

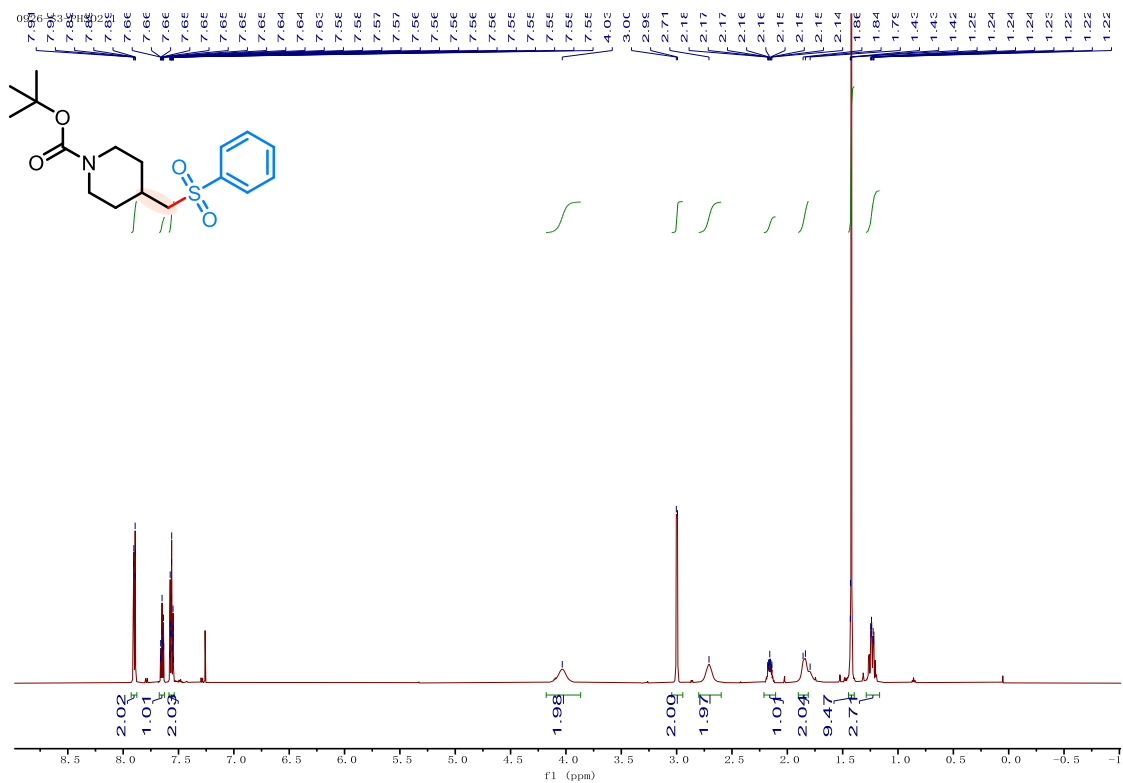

**<sup>13</sup>C {<sup>1</sup>H} NMR Spectrum of 21 (CDCl<sub>3</sub> as solvent, 151 MHz)**

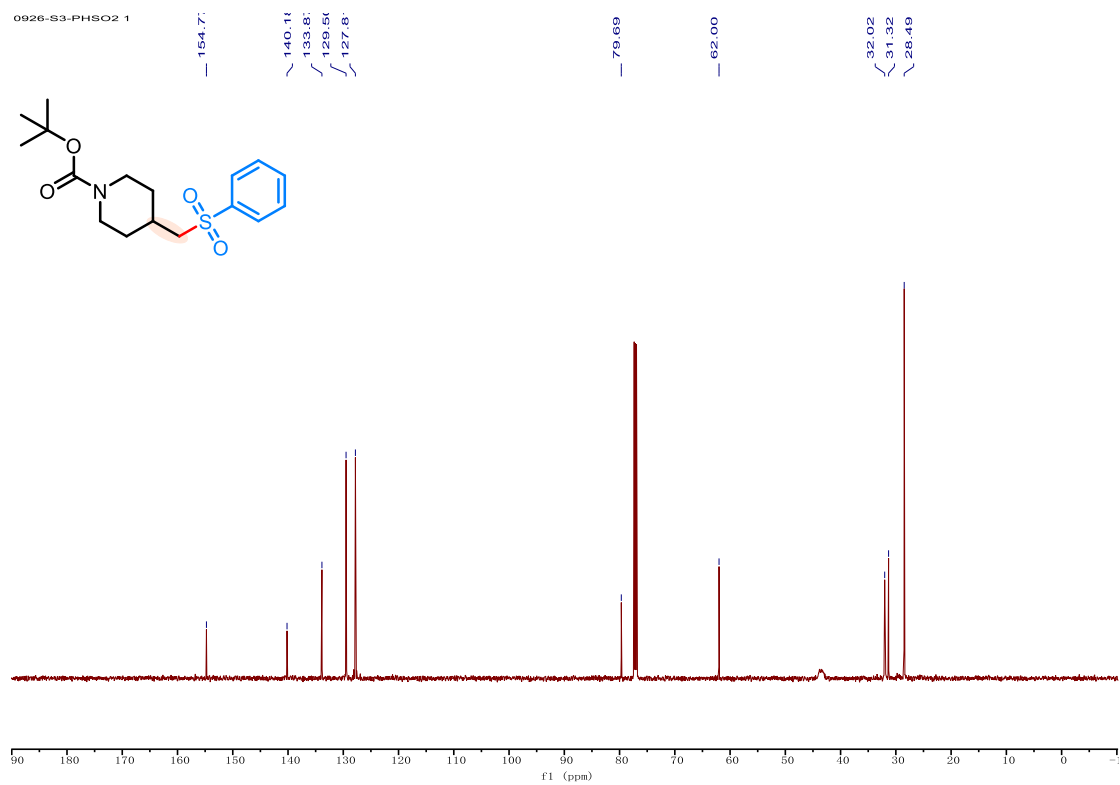



**$^1\text{H}$  NMR Spectrum of 22 ( $\text{CDCl}_3$  as solvent, 600 MHz)**

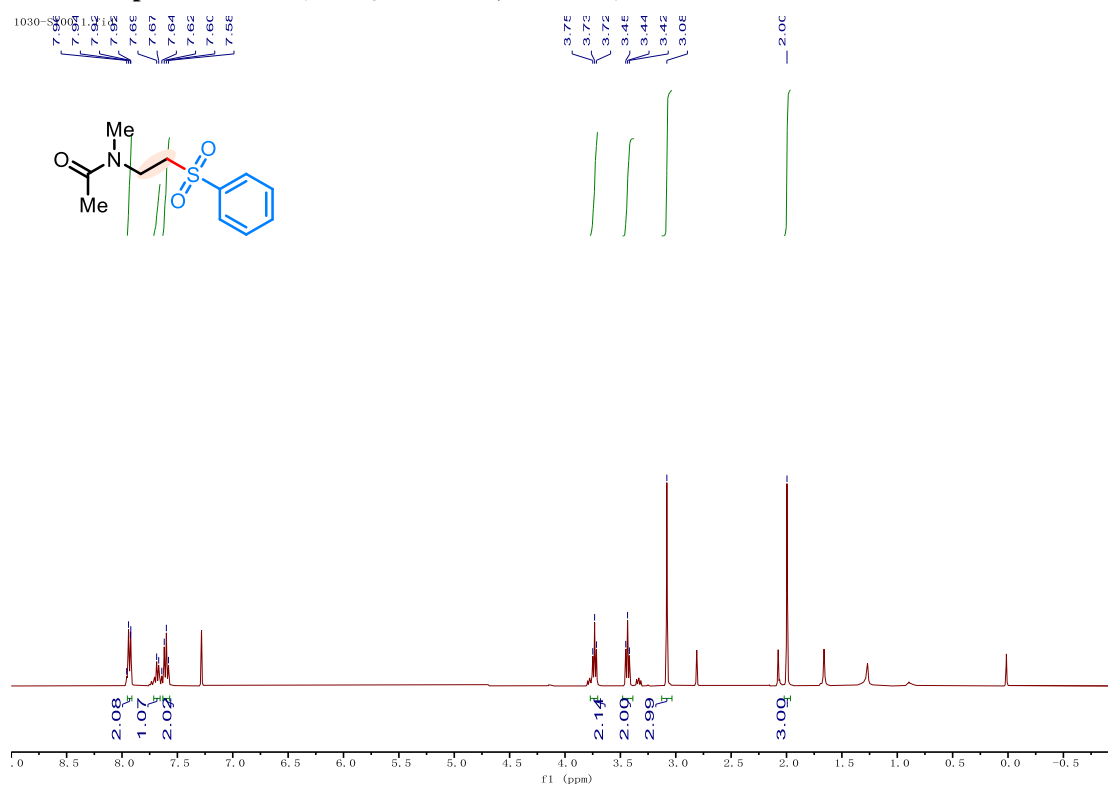

**$^{13}\text{C}$   $\{^1\text{H}\}$  NMR Spectrum of 22 ( $\text{CDCl}_3$  as solvent, 151 MHz)**

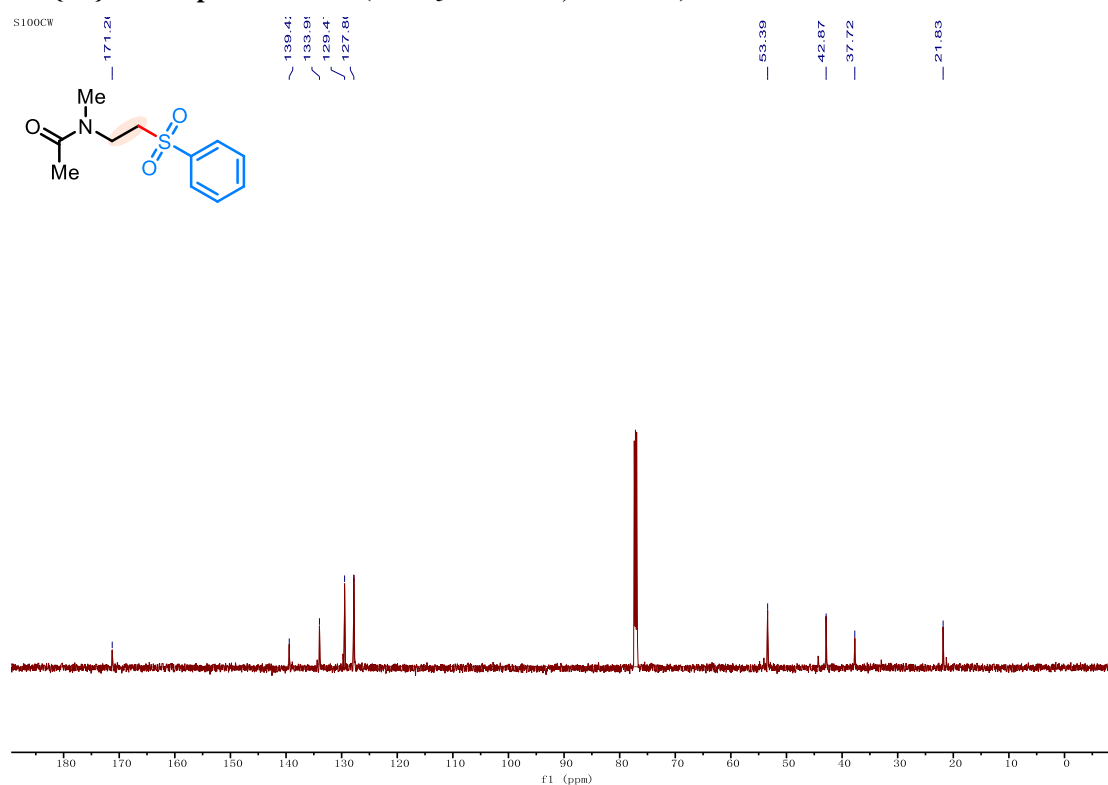

# <sup>1</sup>H NMR Spectrum of 23 (CDCl<sub>3</sub> as solvent, 400 MHz)

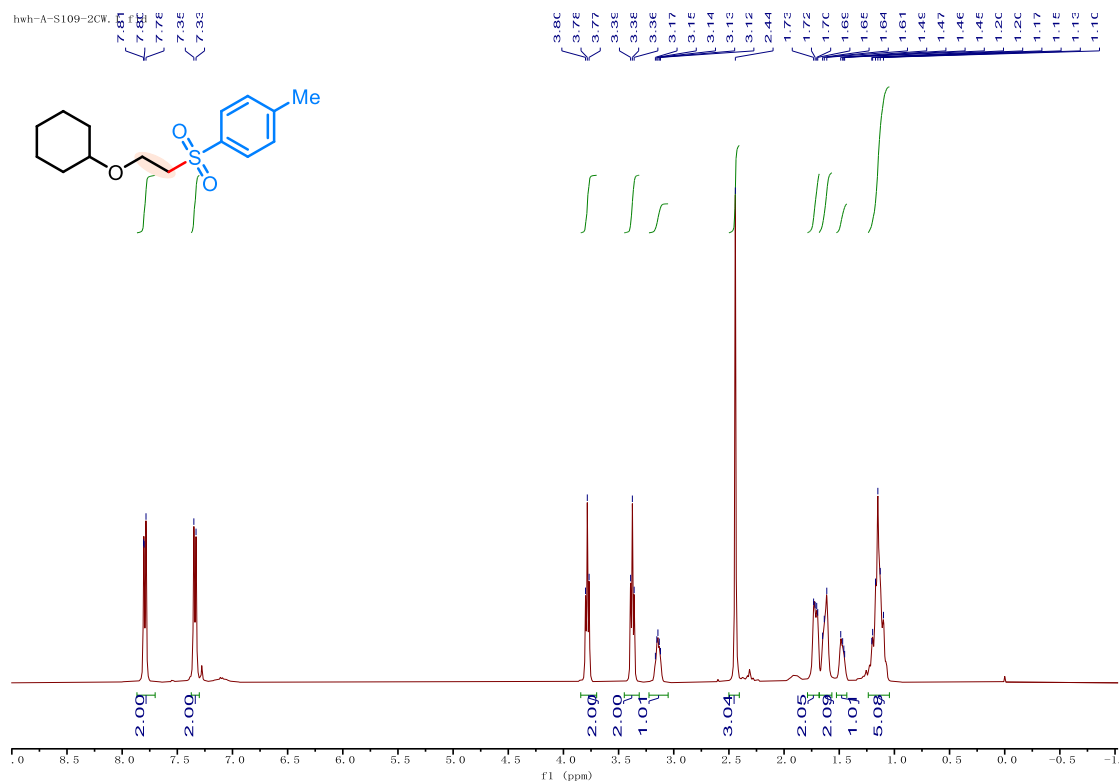

## <sup>13</sup>C {<sup>1</sup>H} NMR Spectrum of 23 (CDCl<sub>3</sub> as solvent, 101 MHz)

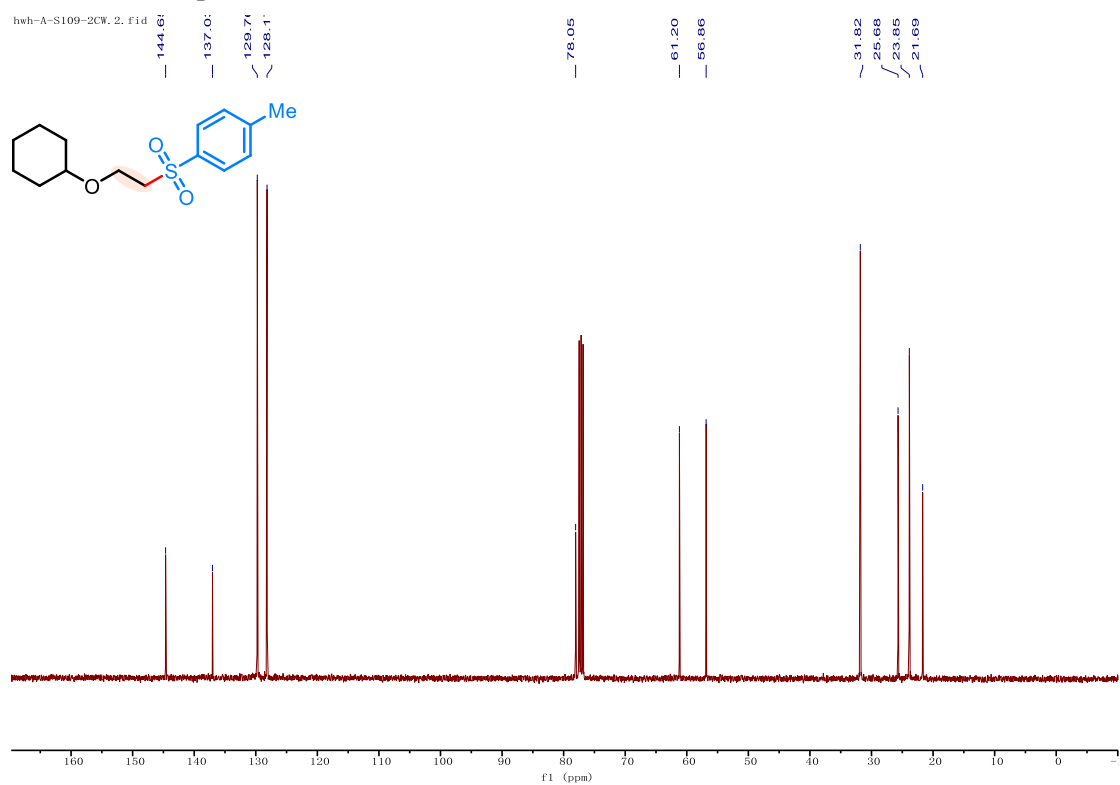

Chemical structure: CS(=O)(=O)OCC1CO1 (4-methylbenzenesulfonate, MeSO<sub>3</sub>Na)

<sup>1</sup>H NMR spectrum (DMSO-d<sub>6</sub>) showing peaks at 7.73 (d, 2H), 7.32 (d, 2H), 2.44 (s, 3H), and 2.03 (s, 3H). The spectrum is labeled with peak numbers 1 through 12 and integration values.

hwh-A-S140CW

Chemical structure: CC1=CC=C(S(=O)(=O)OCC1)C

Peak list (ppm):

| Peak (ppm) |
|------------|
| 144.61     |
| 136.11     |
| 129.9      |
| 128.0      |
| 56.30      |
| 52.23      |
| 47.04      |
| 32.26      |
| 28.83      |
| 28.18      |
| 25.67      |
| 22.66      |
| 21.64      |

**$^1\text{H}$  NMR Spectrum of 25 ( $\text{CDCl}_3$  as solvent, 400 MHz)**

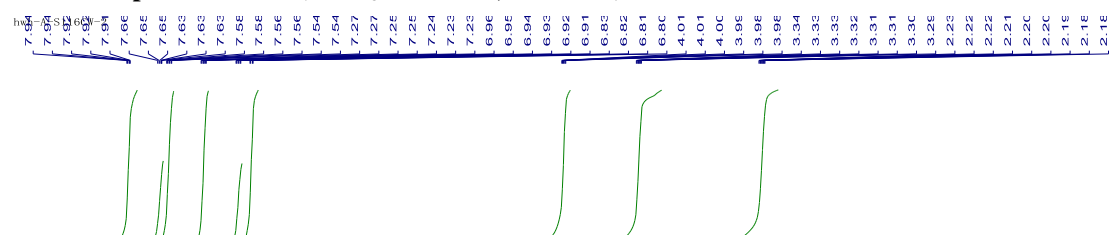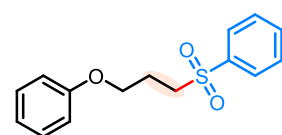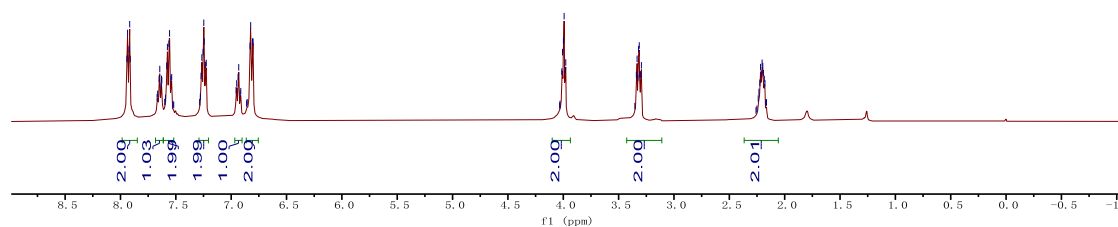

**$^{13}\text{C}$   $\{^1\text{H}\}$  NMR Spectrum of 25 ( $\text{CDCl}_3$  as solvent, 101 MHz)**

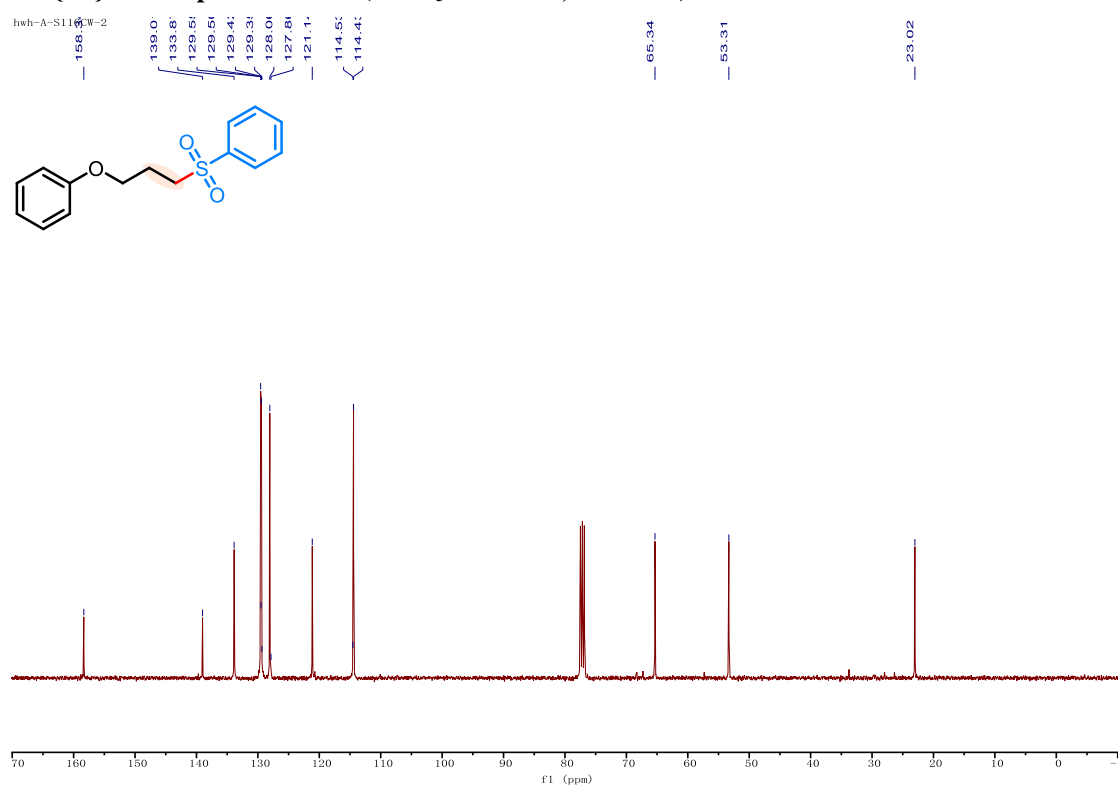

**$^1\text{H}$  NMR Spectrum of 26 ( $\text{CDCl}_3$  as solvent, 600 MHz)**

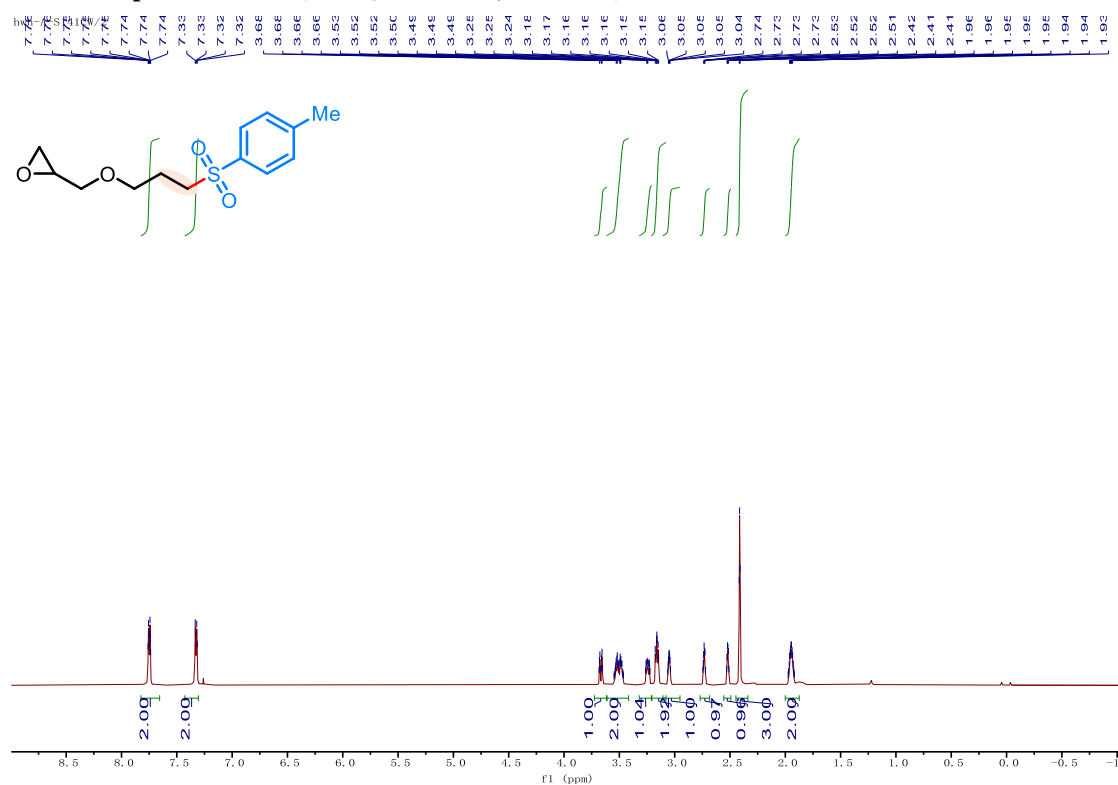

**$^{13}\text{C}$   $\{^1\text{H}\}$  NMR Spectrum of 26 ( $\text{CDCl}_3$  as solvent, 151 MHz)**

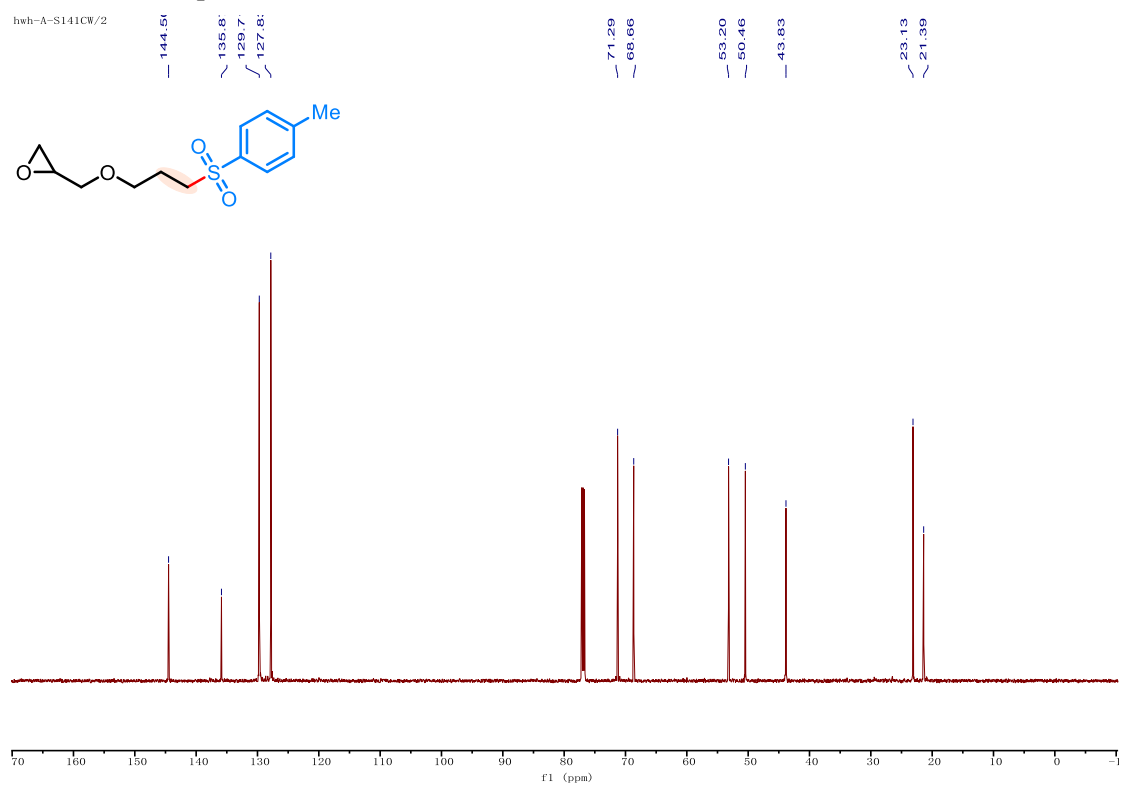

**$^1\text{H}$  NMR Spectrum of 27 ( $\text{CDCl}_3$  as solvent, 600 MHz)**

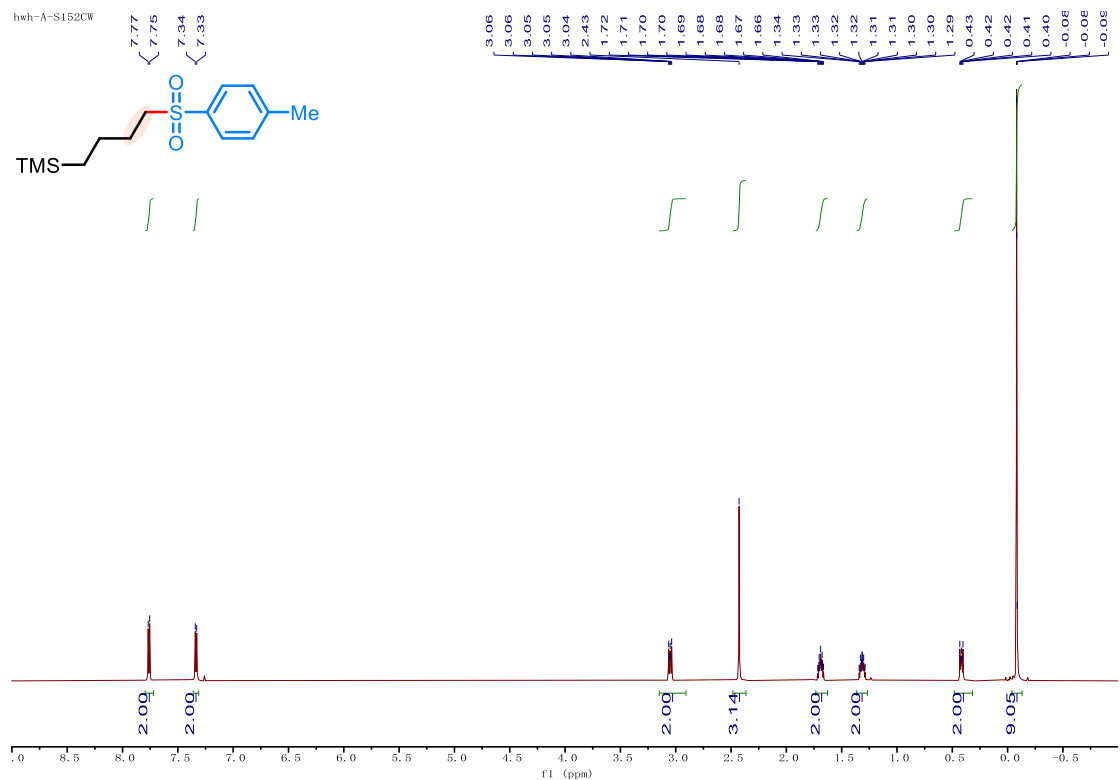

**$^{13}\text{C}$   $\{^1\text{H}\}$  NMR Spectrum of 27 ( $\text{CDCl}_3$  as solvent, 105 MHz)**

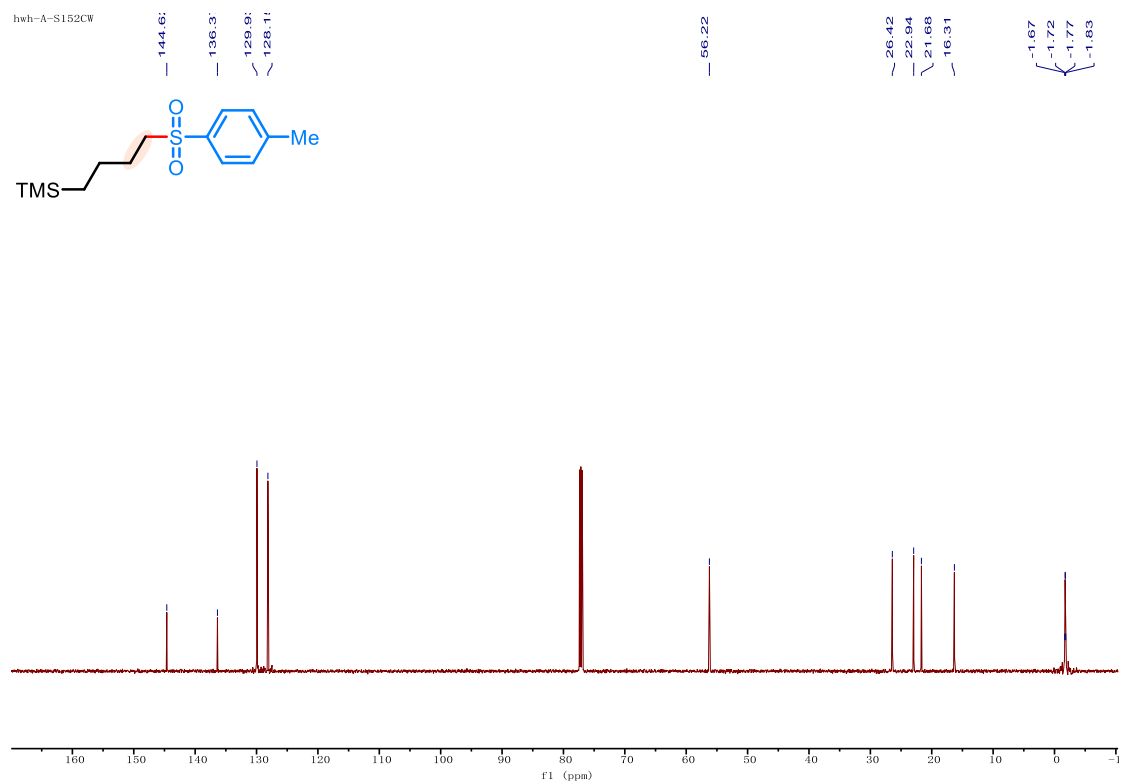

**$^1\text{H}$  NMR Spectrum of 28 ( $\text{CDCl}_3$  as solvent, 400 MHz)**

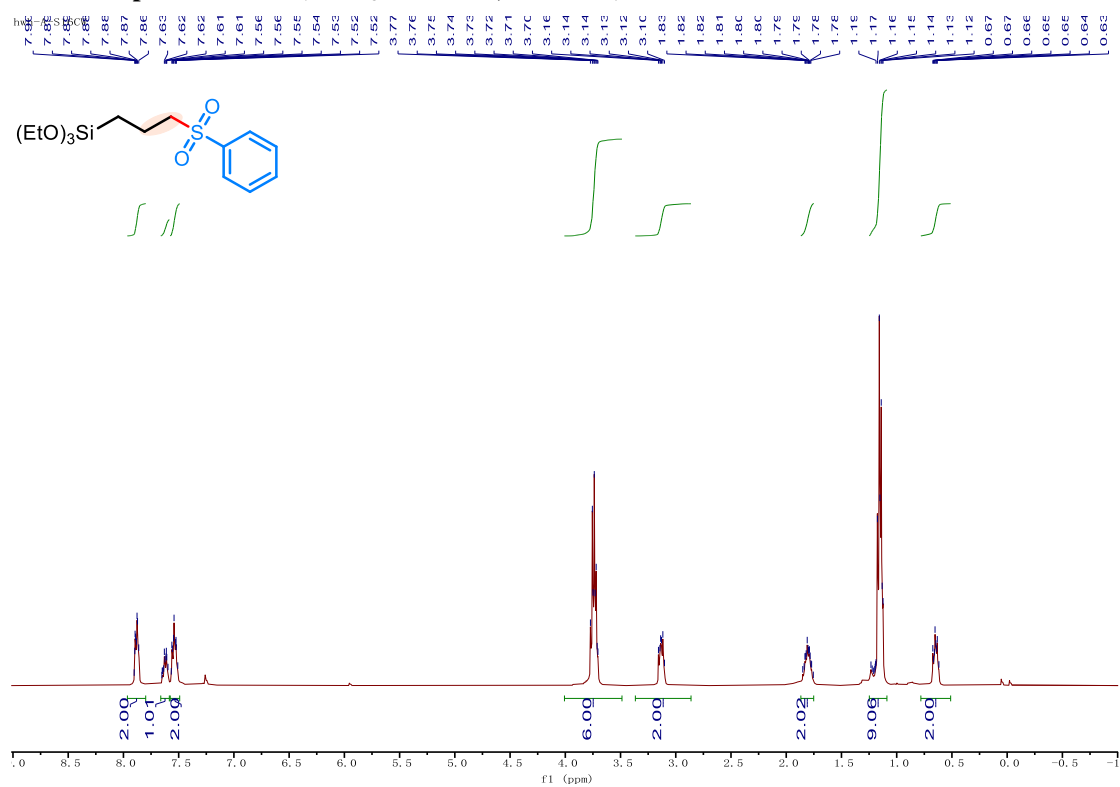

**$^{13}\text{C}$   $\{^1\text{H}\}$  NMR Spectrum of 28 ( $\text{CDCl}_3$  as solvent, 101 MHz)**

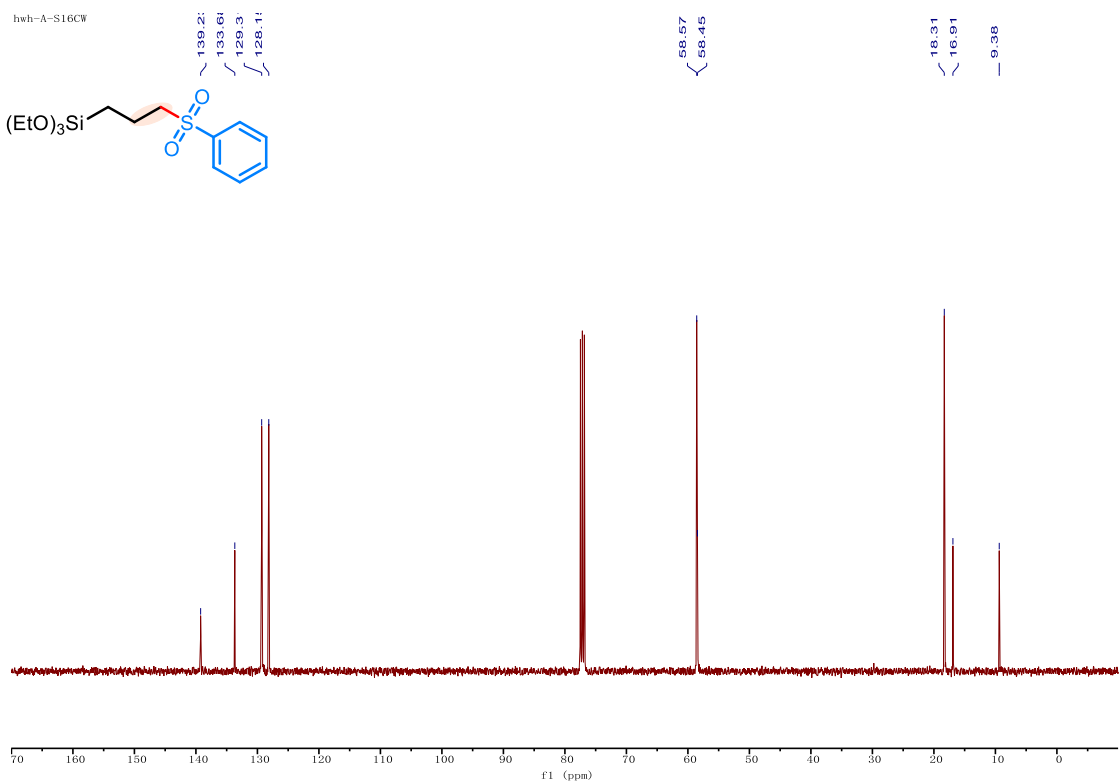

**<sup>1</sup>H NMR Spectrum of 29 (CDCl<sub>3</sub> as solvent, 400 MHz)**

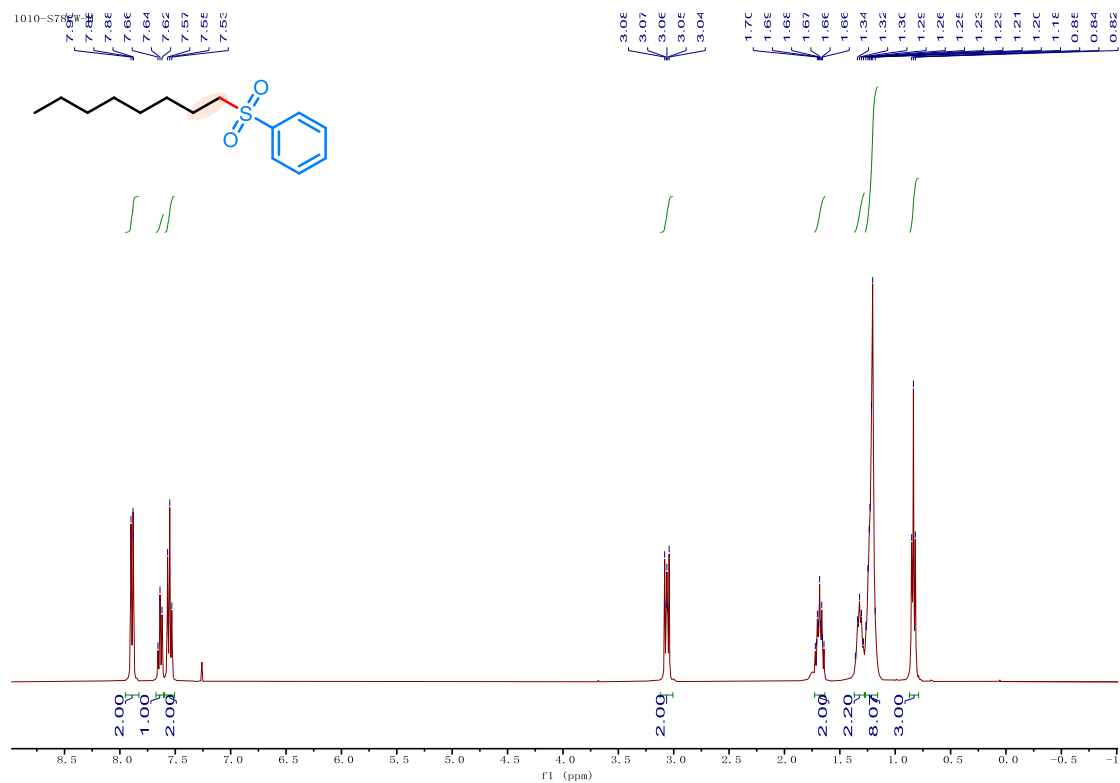

**<sup>13</sup>C {<sup>1</sup>H} NMR Spectrum of 29 (CDCl<sub>3</sub> as solvent, 101 MHz)**

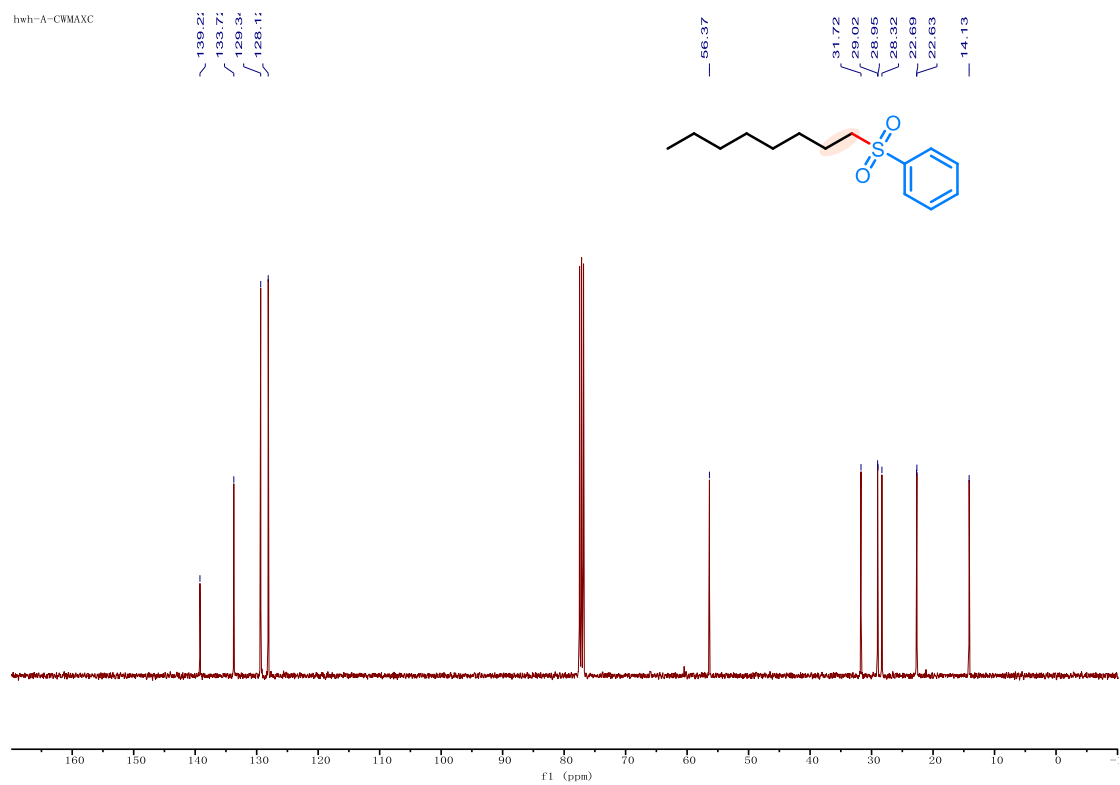



**$^1\text{H}$  NMR Spectrum of 30 ( $\text{CDCl}_3$  as solvent, 400 MHz)**

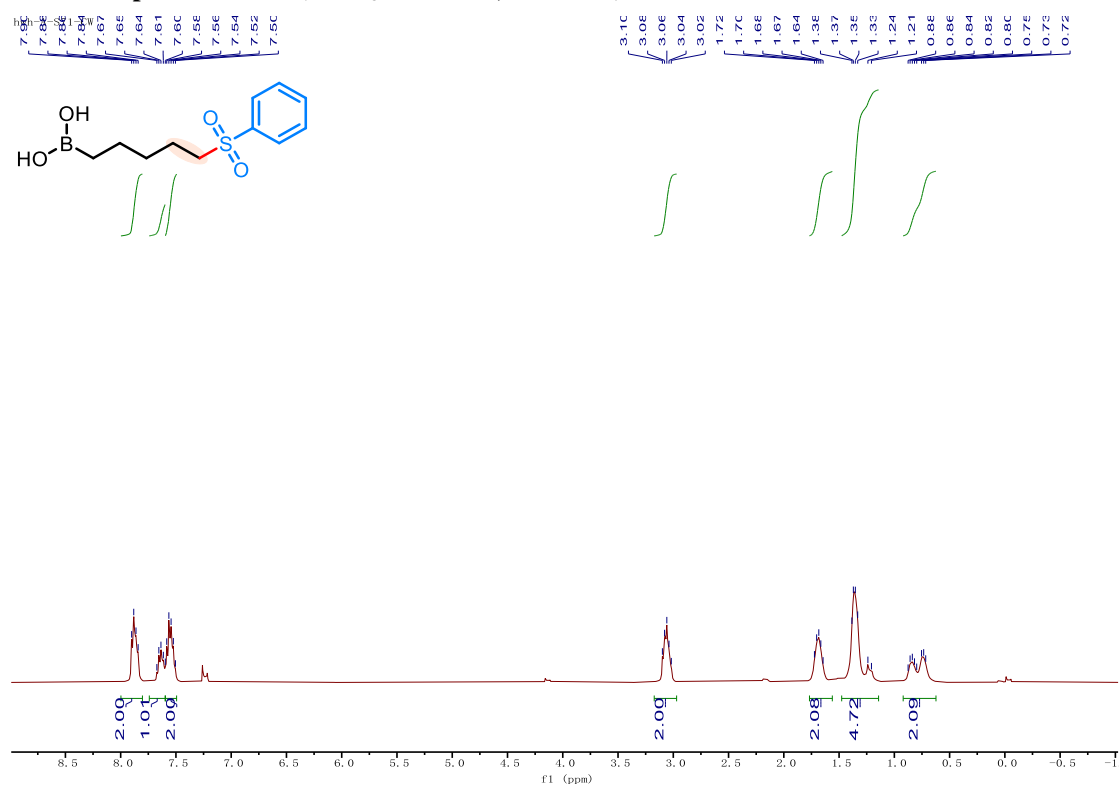

**$^{13}\text{C}$   $\{^1\text{H}\}$  NMR Spectrum of 30 ( $\text{CDCl}_3$  as solvent, 101 MHz)**

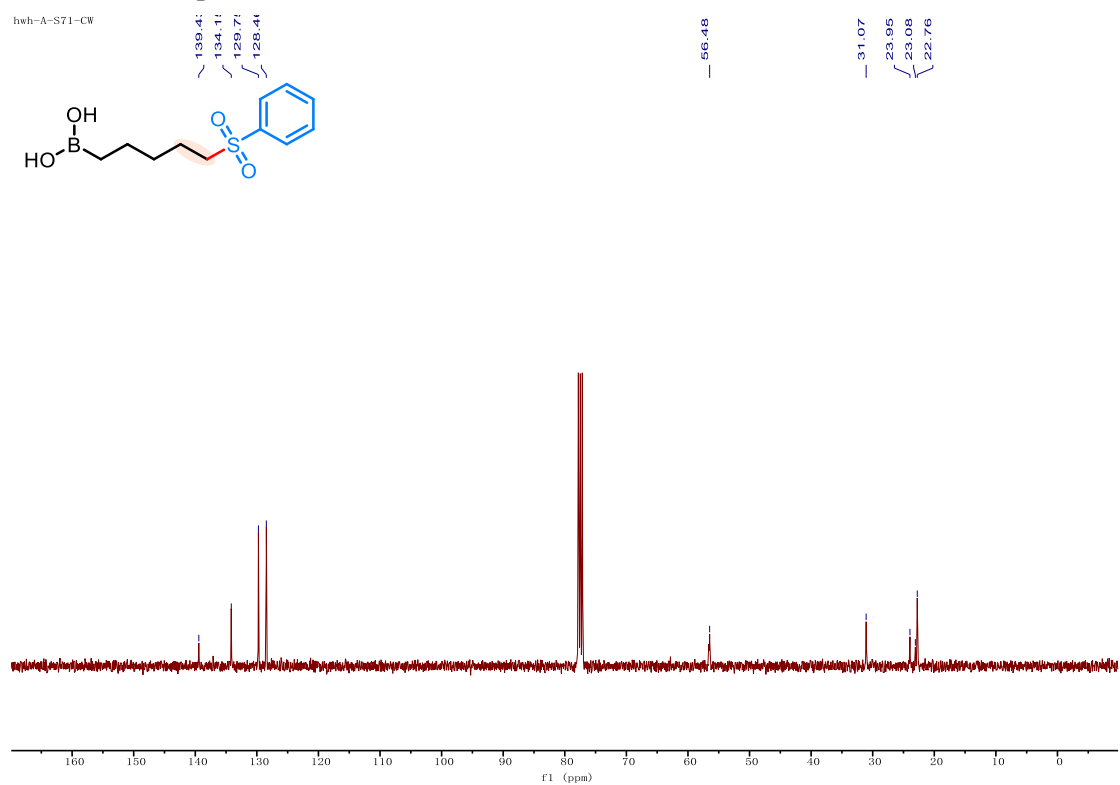

**$^1\text{H}$  NMR Spectrum of 31 ( $\text{CDCl}_3$  as solvent, 600 MHz)**

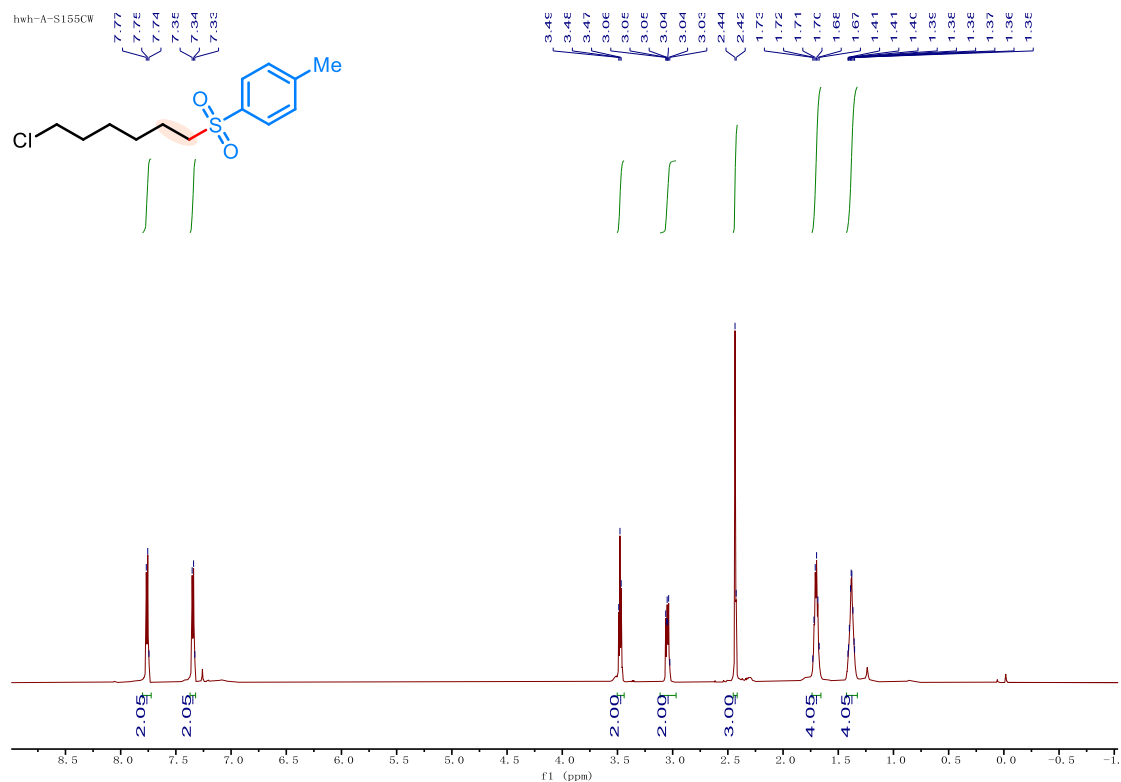

**$^{13}\text{C}$   $\{^1\text{H}\}$  NMR Spectrum of 31 ( $\text{CDCl}_3$  as solvent, 151 MHz)**

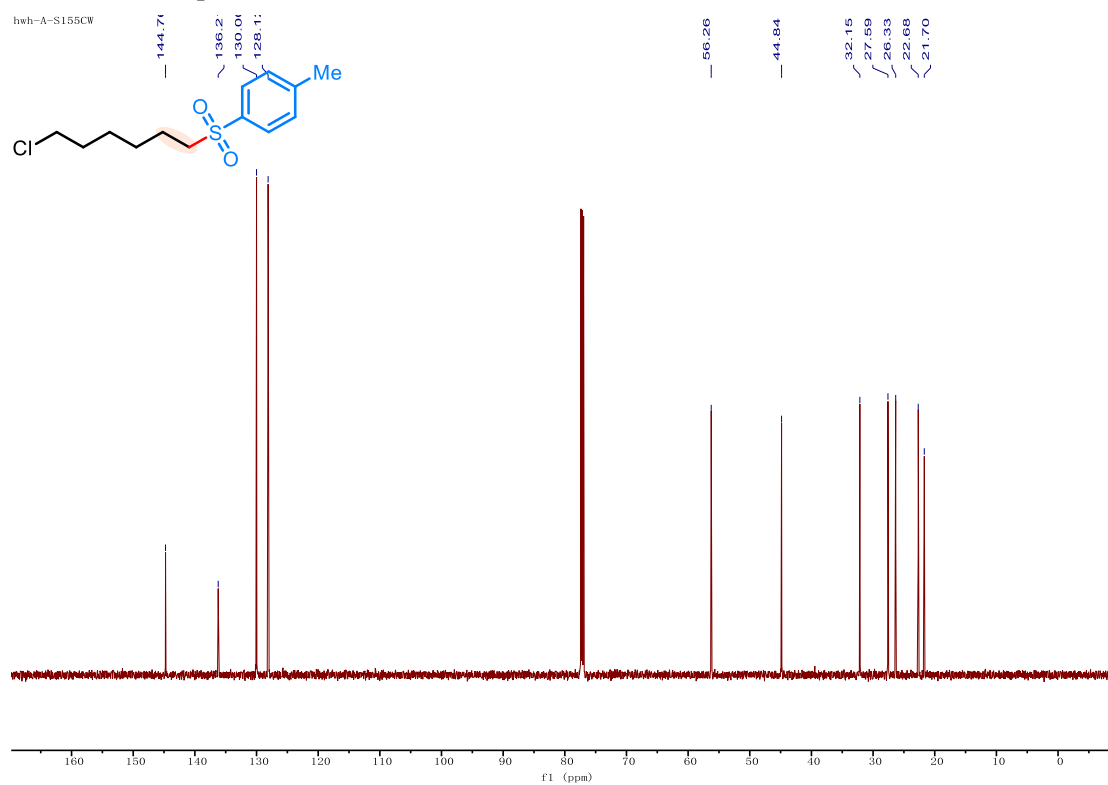

hwh-A-S8-CW

BrCCCCOS(=O)(=O)c1ccccc1

139.0  
133.8  
129.4  
126.1  
56.09  
33.12  
32.10  
26.89  
22.00

Chemical structure: BrCCCCc1ccccc1S(=O)(=O)c2ccccc2

<sup>1</sup>H NMR spectrum (ppm):

- 7.68, 7.66, 7.64, 7.58, 7.55, 7.53, 7.51, 7.50, 7.48, 7.46, 7.44, 7.42, 7.40, 7.38, 7.36, 7.34, 7.32, 7.30, 7.28, 7.26, 7.24, 7.22, 7.20, 7.18, 7.16, 7.14, 7.12, 7.10, 7.08, 7.06, 7.04, 7.02, 7.00, 6.98, 6.96, 6.94, 6.92, 6.90, 6.88, 6.86, 6.84, 6.82, 6.80, 6.78, 6.76, 6.74, 6.72, 6.70, 6.68, 6.66, 6.64, 6.62, 6.60, 6.58, 6.56, 6.54, 6.52, 6.50, 6.48, 6.46, 6.44, 6.42, 6.40, 6.38, 6.36, 6.34, 6.32, 6.30, 6.28, 6.26, 6.24, 6.22, 6.20, 6.18, 6.16, 6.14, 6.12, 6.10, 6.08, 6.06, 6.04, 6.02, 6.00, 5.98, 5.96, 5.94, 5.92, 5.90, 5.88, 5.86, 5.84, 5.82, 5.80, 5.78, 5.76, 5.74, 5.72, 5.70, 5.68, 5.66, 5.64, 5.62, 5.60, 5.58, 5.56, 5.54, 5.52, 5.50, 5.48, 5.46, 5.44, 5.42, 5.40, 5.38, 5.36, 5.34, 5.32, 5.30, 5.28, 5.26, 5.24, 5.22, 5.20, 5.18, 5.16, 5.14, 5.12, 5.10, 5.08, 5.06, 5.04, 5.02, 5.00, 4.98, 4.96, 4.94, 4.92, 4.90, 4.88, 4.86, 4.84, 4.82, 4.80, 4.78, 4.76, 4.74, 4.72, 4.70, 4.68, 4.66, 4.64, 4.62, 4.60, 4.58, 4.56, 4.54, 4.52, 4.50, 4.48, 4.46, 4.44, 4.42, 4.40, 4.38, 4.36, 4.34, 4.32, 4.30, 4.28, 4.26, 4.24, 4.22, 4.20, 4.18, 4.16, 4.14, 4.12, 4.10, 4.08, 4.06, 4.04, 4.02, 4.00, 3.98, 3.96, 3.94, 3.92, 3.90, 3.88, 3.86, 3.84, 3.82, 3.80, 3.78, 3.76, 3.74, 3.72, 3.70, 3.68, 3.66, 3.64, 3.62, 3.60, 3.58, 3.56, 3.54, 3.52, 3.50, 3.48, 3.46, 3.44, 3.42, 3.40, 3.38, 3.36, 3.34, 3.32, 3.30, 3.28, 3.26, 3.24, 3.22, 3.20, 3.18, 3.16, 3.14, 3.12, 3.10, 3.08, 3.06, 3.04, 3.02, 3.00, 2.98, 2.96, 2.94, 2.92, 2.90, 2.88, 2.86, 2.84, 2.82, 2.80, 2.78, 2.76, 2.74, 2.72, 2.70, 2.68, 2.66, 2.64, 2.62, 2.60, 2.58, 2.56, 2.54, 2.52, 2.50, 2.48, 2.46, 2.44, 2.42, 2.40, 2.38, 2.36, 2.34, 2.32, 2.30, 2.28, 2.26, 2.24, 2.22, 2.20, 2.18, 2.16, 2.14, 2.12, 2.10, 2.08, 2.06, 2.04, 2.02, 2.00, 1.98, 1.96, 1.94, 1.92, 1.90, 1.88, 1.86, 1.84, 1.82, 1.80, 1.78, 1.76, 1.74, 1.72, 1.70, 1.68, 1.66, 1.64, 1.62, 1.60, 1.58, 1.56, 1.54, 1.52, 1.50, 1.48, 1.46, 1.44, 1.42, 1.40, 1.38, 1.36.

Integration values (from left to right): 2.00, 1.02, 2.00, 2.00, 2.00, 2.04, 2.09, 4.10.

hwh-A-S60

BrCCCCCS(=O)(=O)c1ccccc1

139.14  
133.82  
129.41  
128.14

56.18

33.66  
32.29  
27.61  
27.49  
22.60

f1 (ppm)

**$^1\text{H}$  NMR Spectrum of 34 ( $\text{CDCl}_3$  as solvent, 400 MHz)**

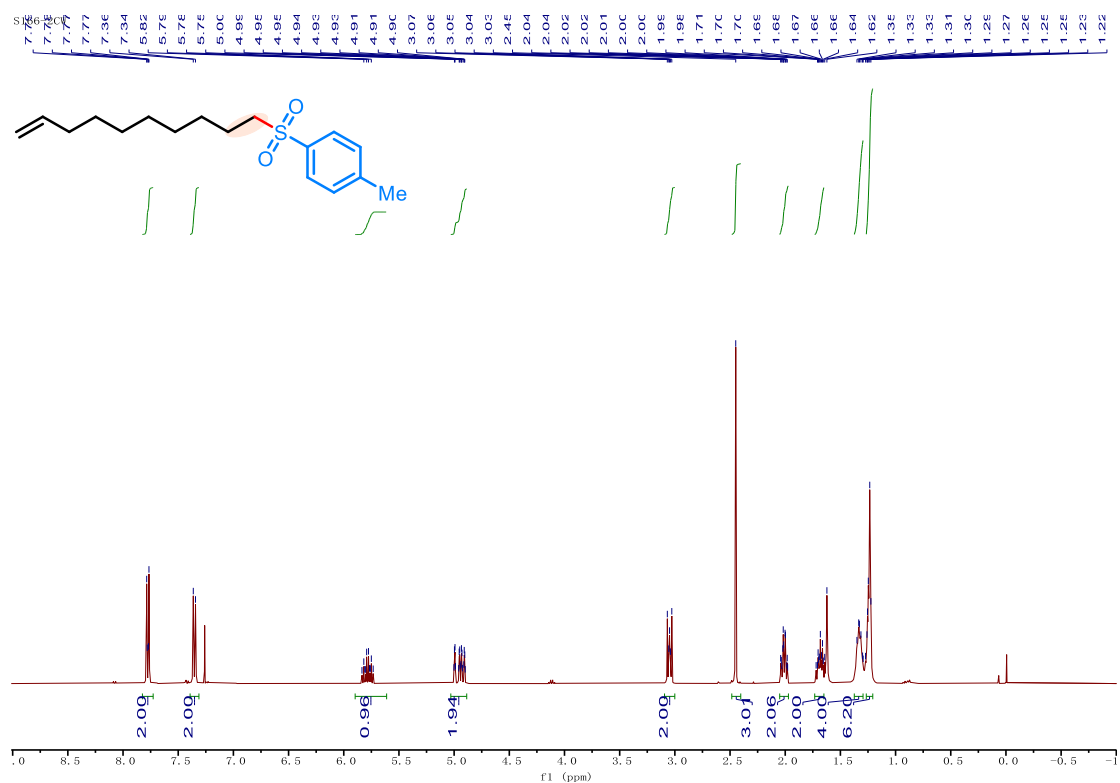

**$^{13}\text{C}$   $\{^1\text{H}\}$  NMR Spectrum of 34 ( $\text{CDCl}_3$  as solvent, 101 MHz)**

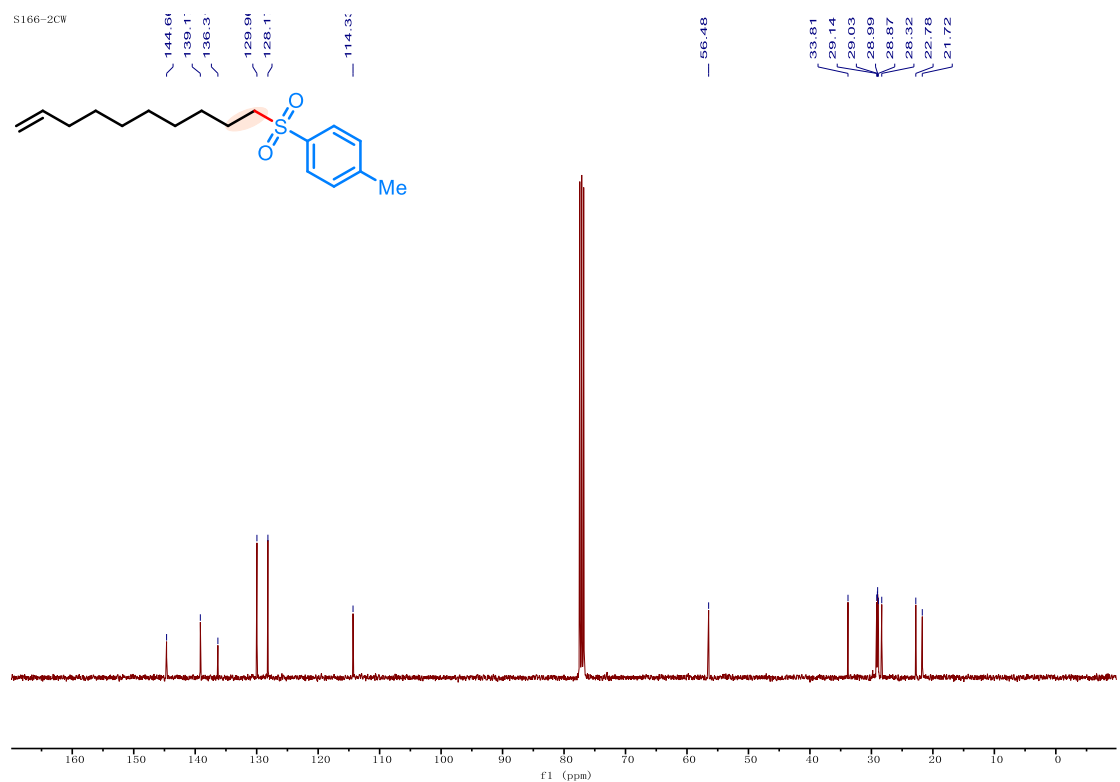

# <sup>1</sup>H NMR Spectrum of 35 (CDCl<sub>3</sub> as solvent, 400 MHz)

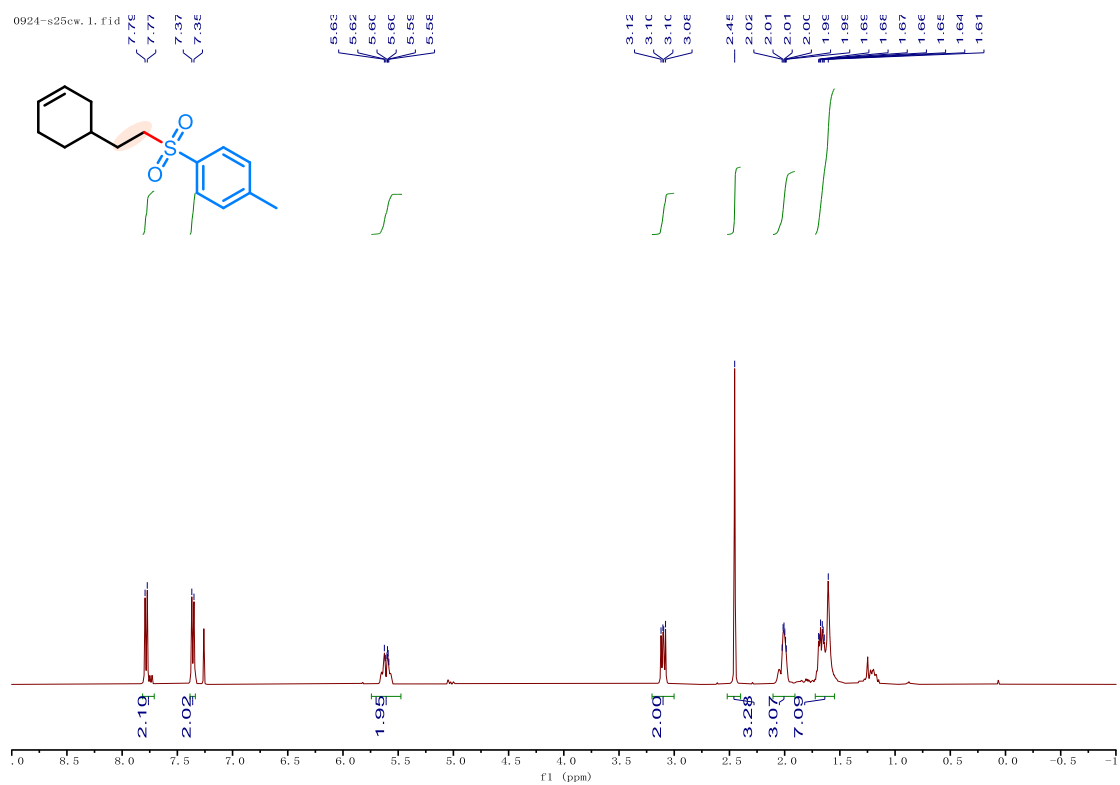

# <sup>13</sup>C {<sup>1</sup>H} NMR Spectrum of 35 (CDCl<sub>3</sub> as solvent, 101 MHz)

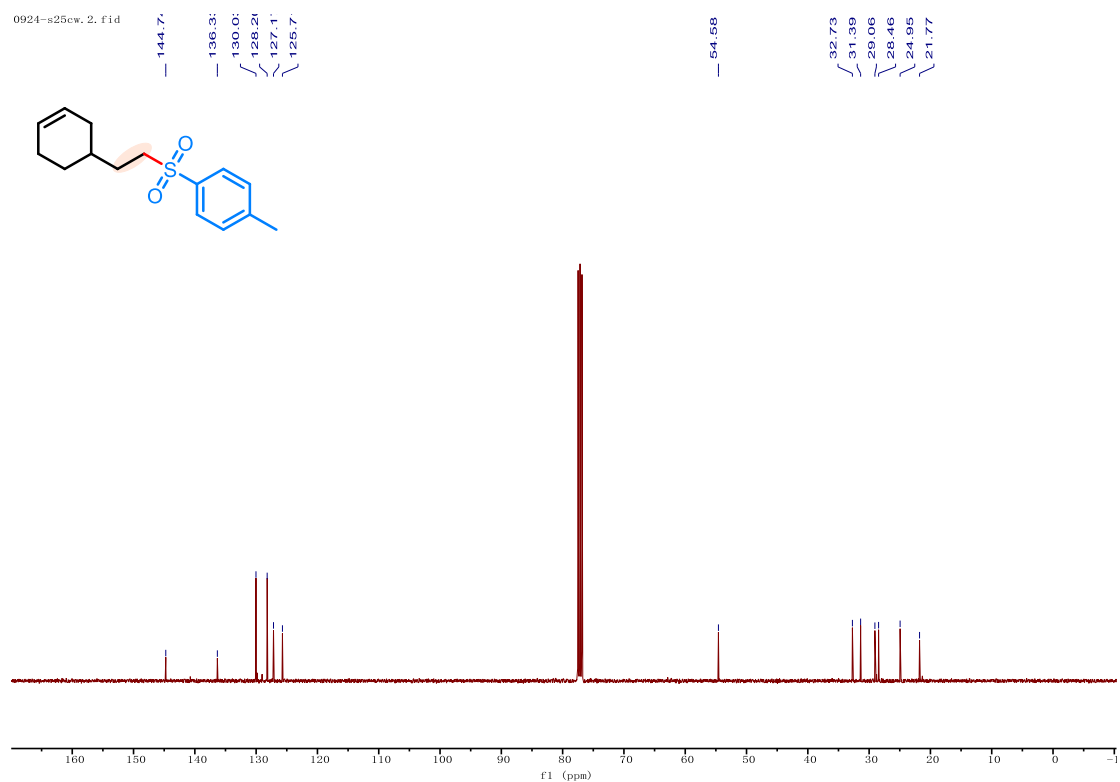

**<sup>1</sup>H NMR Spectrum of 36 (CDCl<sub>3</sub> as solvent, 400 MHz)**

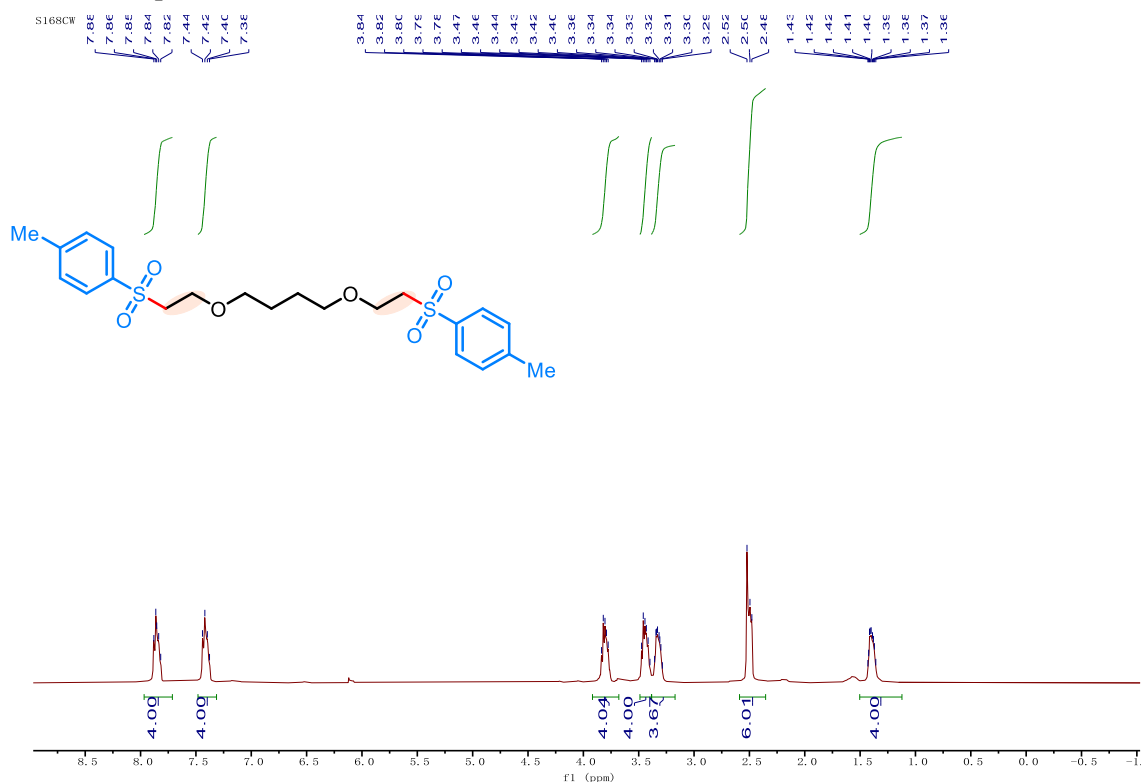

**<sup>13</sup>C {<sup>1</sup>H} NMR Spectrum of 36 (CDCl<sub>3</sub> as solvent, 101 MHz)**

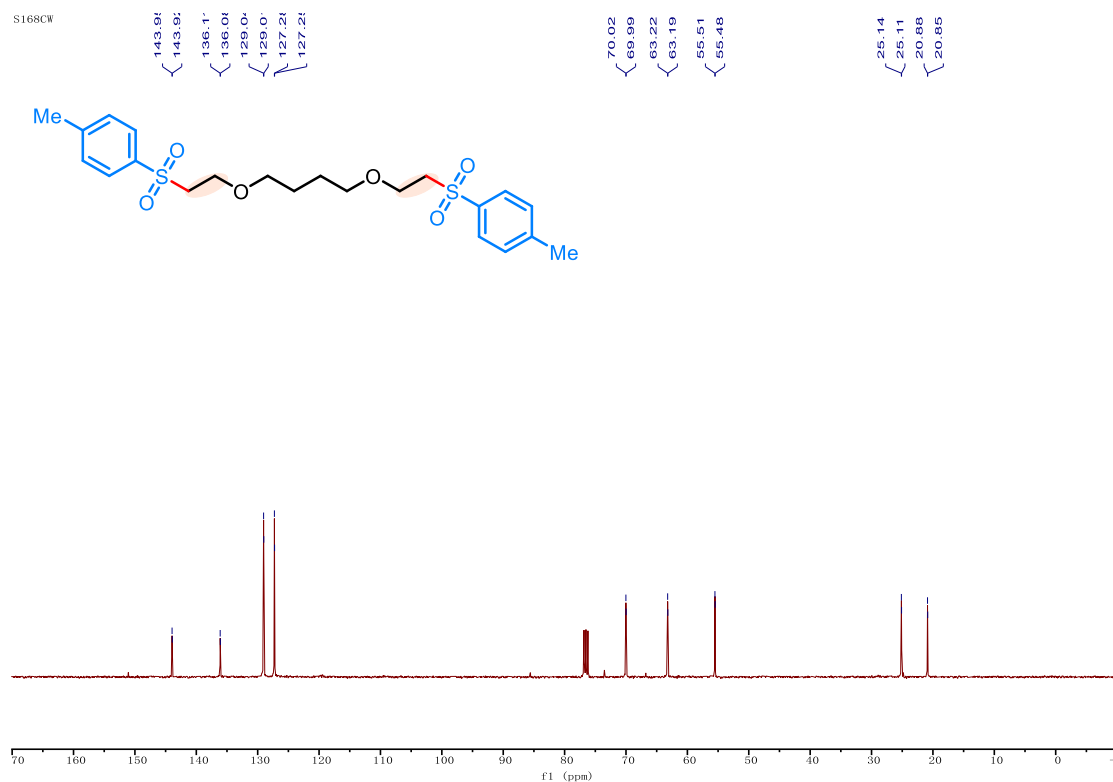

**$^1\text{H}$  NMR Spectrum of 37 ( $\text{CDCl}_3$  as solvent, 400 MHz)**

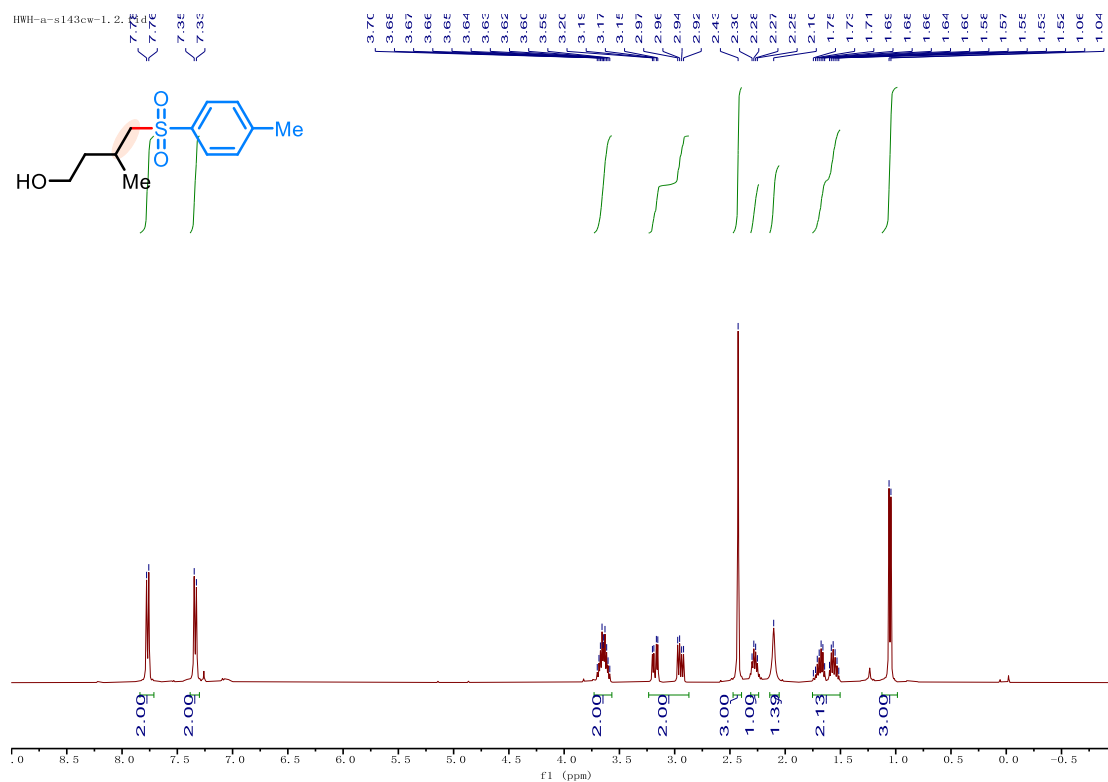

**$^{13}\text{C}$   $\{^1\text{H}\}$  NMR Spectrum of 37 ( $\text{CDCl}_3$  as solvent, 101 MHz)**

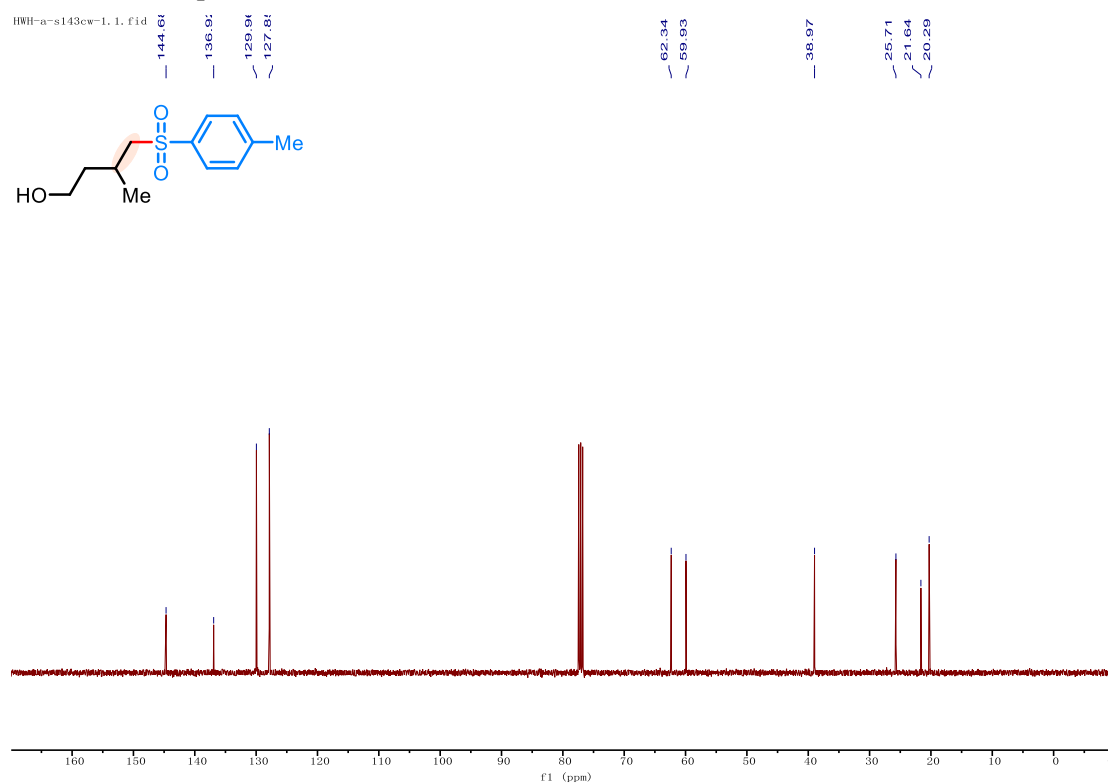



**$^1\text{H}$  NMR Spectrum of 38 ( $\text{CDCl}_3$  as solvent, 400 MHz)**

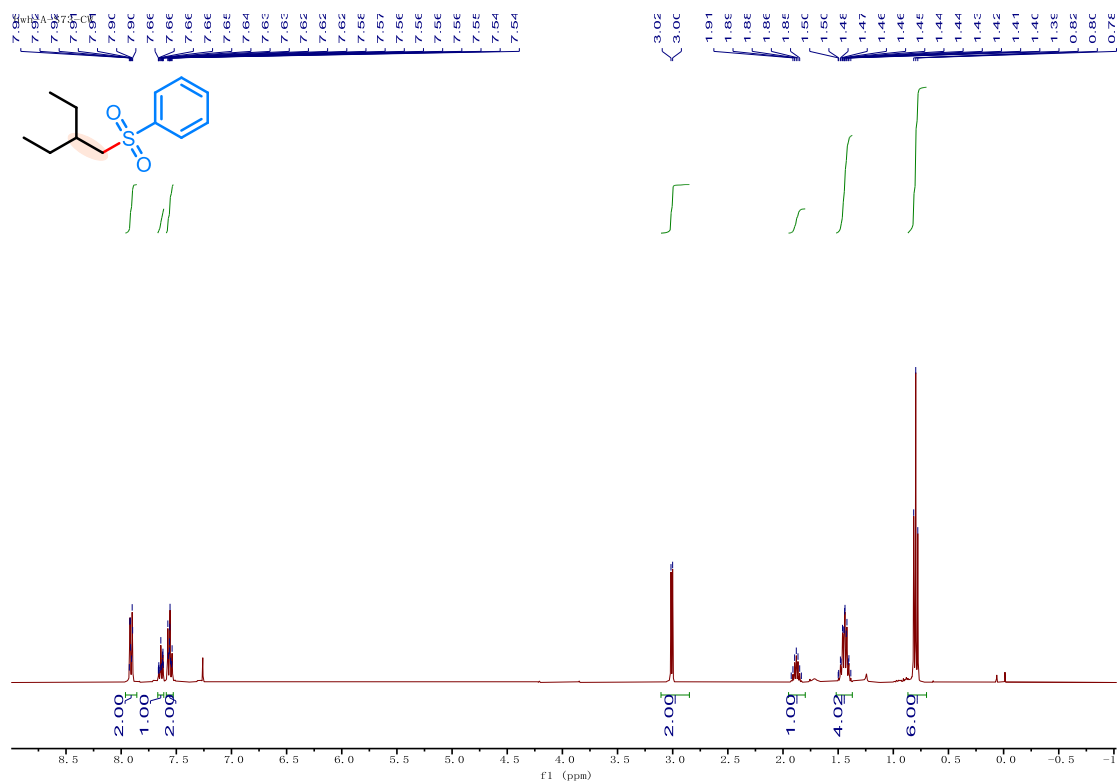

**$^{13}\text{C}$   $\{^1\text{H}\}$  NMR Spectrum of 38 ( $\text{CDCl}_3$  as solvent, 101 MHz)**

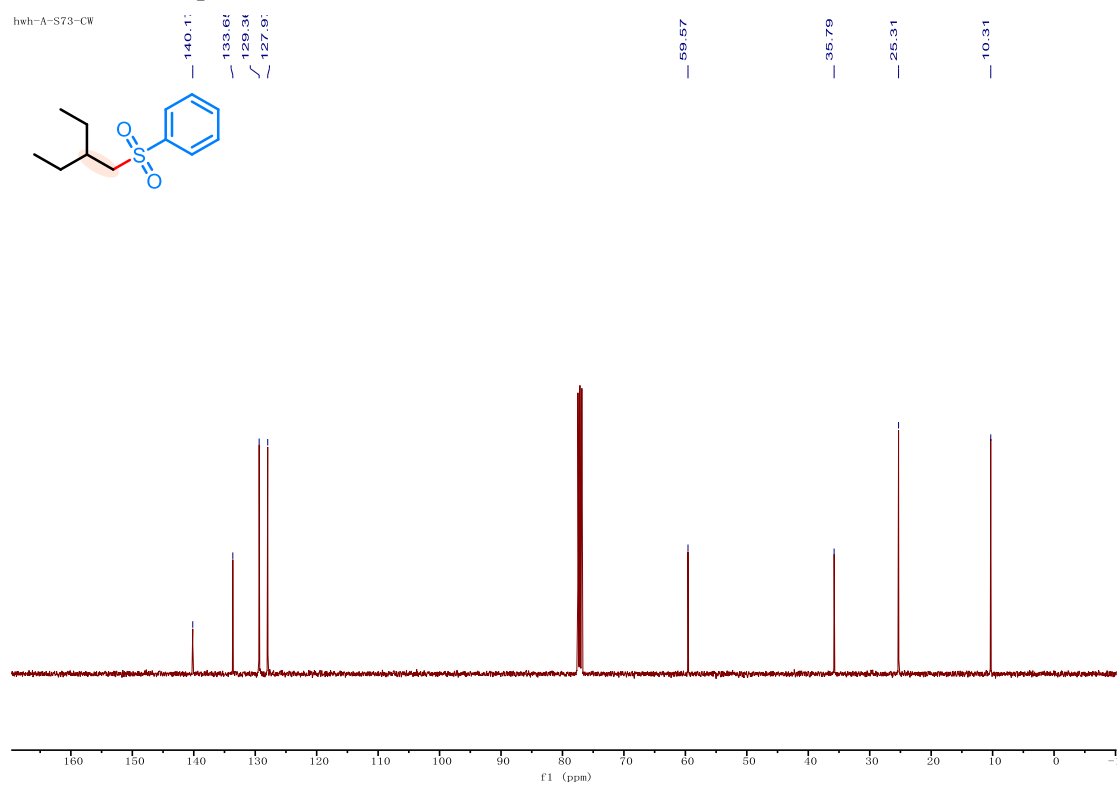

**<sup>1</sup>H NMR Spectrum of 39 (CDCl<sub>3</sub> as solvent, 400 MHz)**

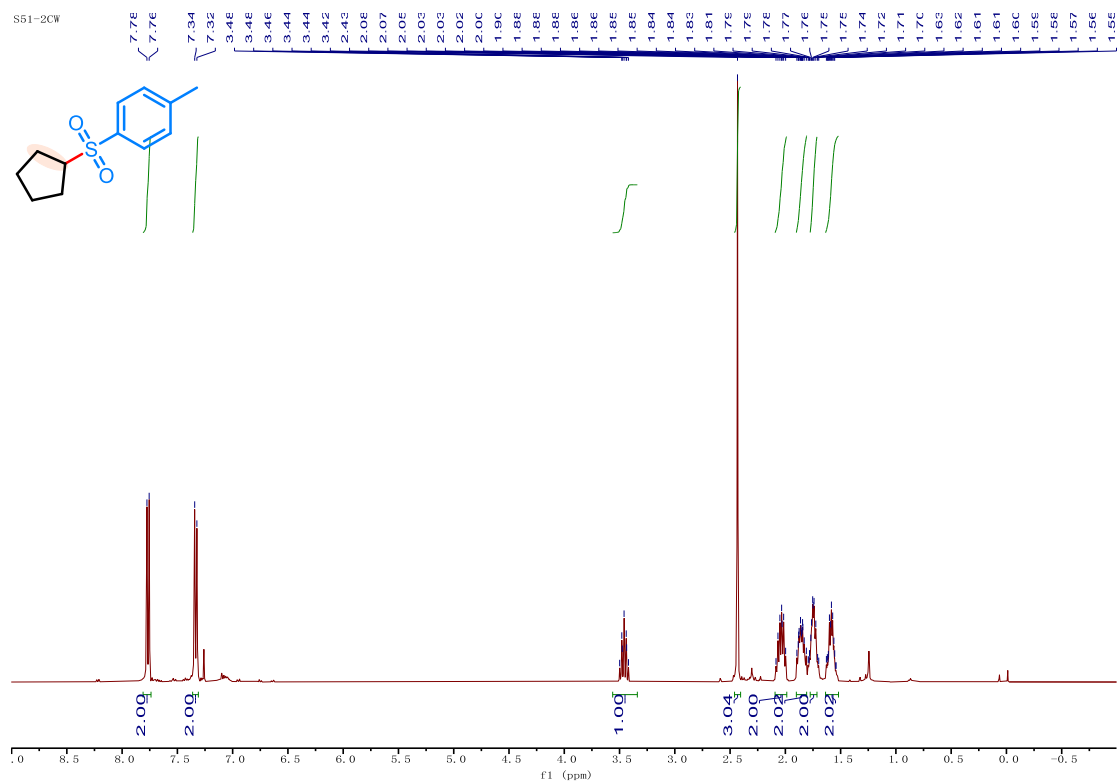

**<sup>13</sup>C {<sup>1</sup>H} NMR Spectrum of 39 (CDCl<sub>3</sub> as solvent, 101 MHz)**

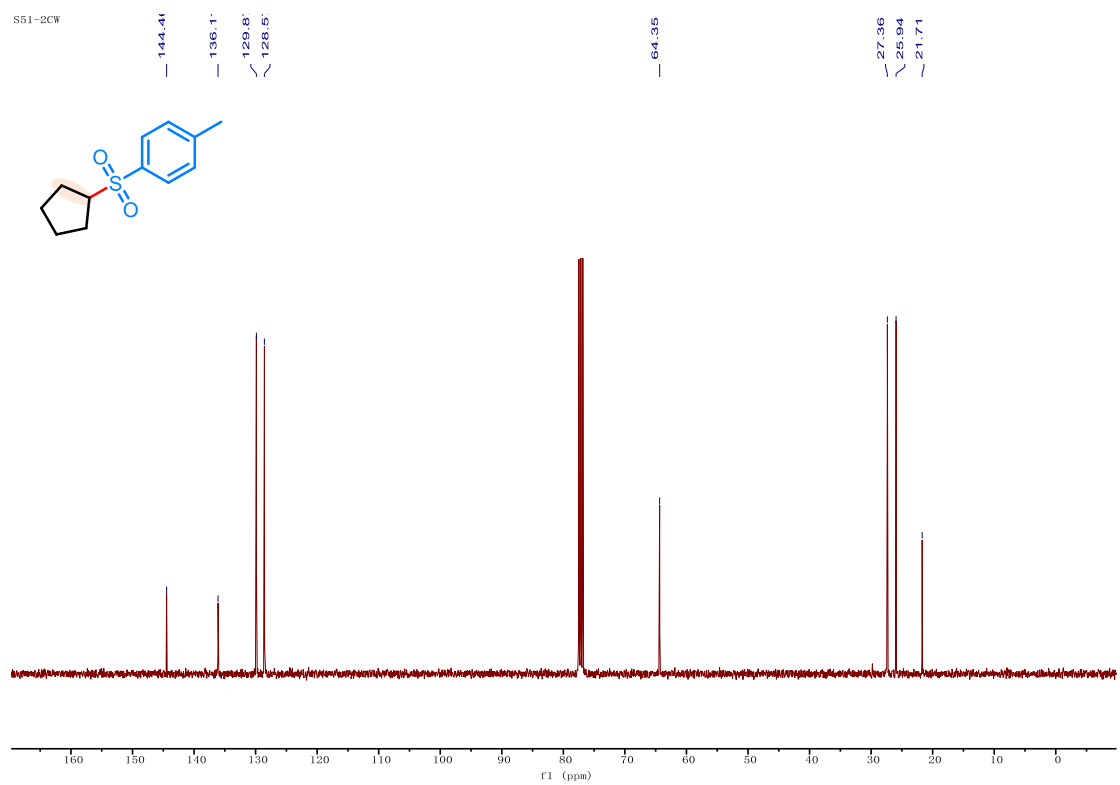



[illegible]

1027-G00-W2

O=S(=O)(Cc1c(F)c(F)c(F)c(F)c1F)c2ccccc2

136.41  
134.2  
128.5  
128.1  
110.8  
54.12  
16.32

f1 (ppm)

**$^{19}\text{F}$  { $^1\text{H}$ } NMR Spectrum of 42 ( $\text{CDCl}_3$  as solvent, 101 MHz)**

1027-G00-W2

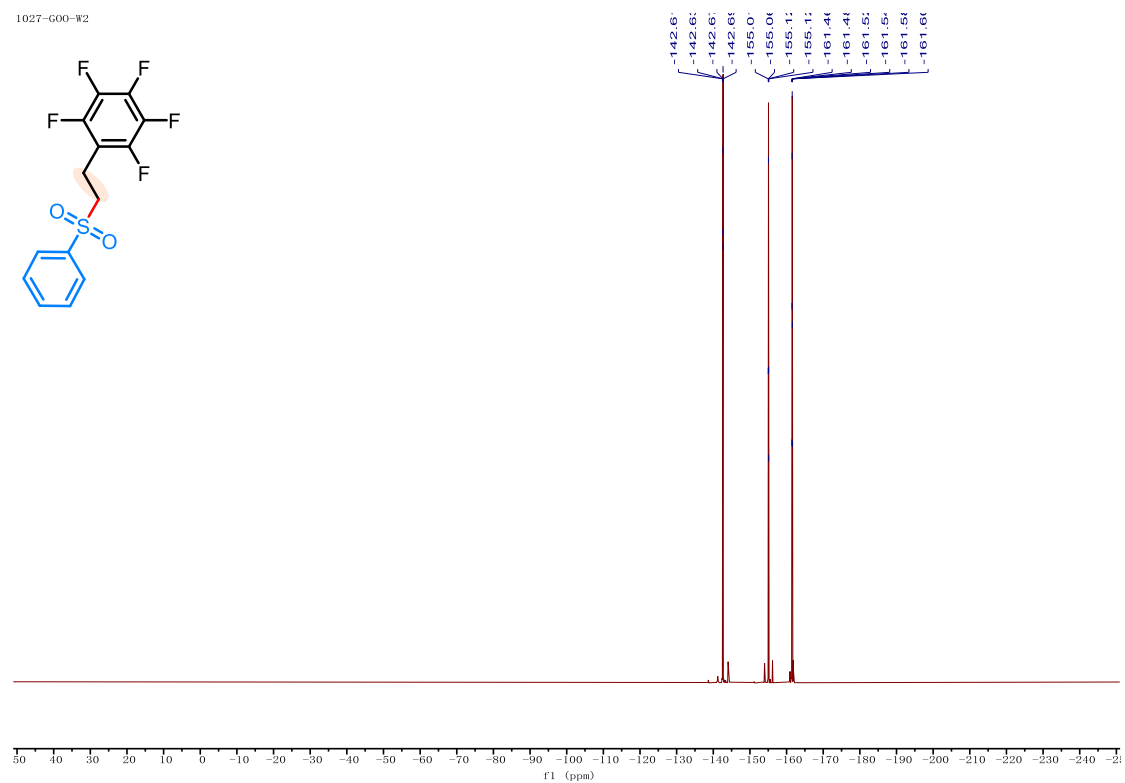

**<sup>1</sup>H NMR Spectrum of 43 (CDCl<sub>3</sub> as solvent, 600 MHz)**

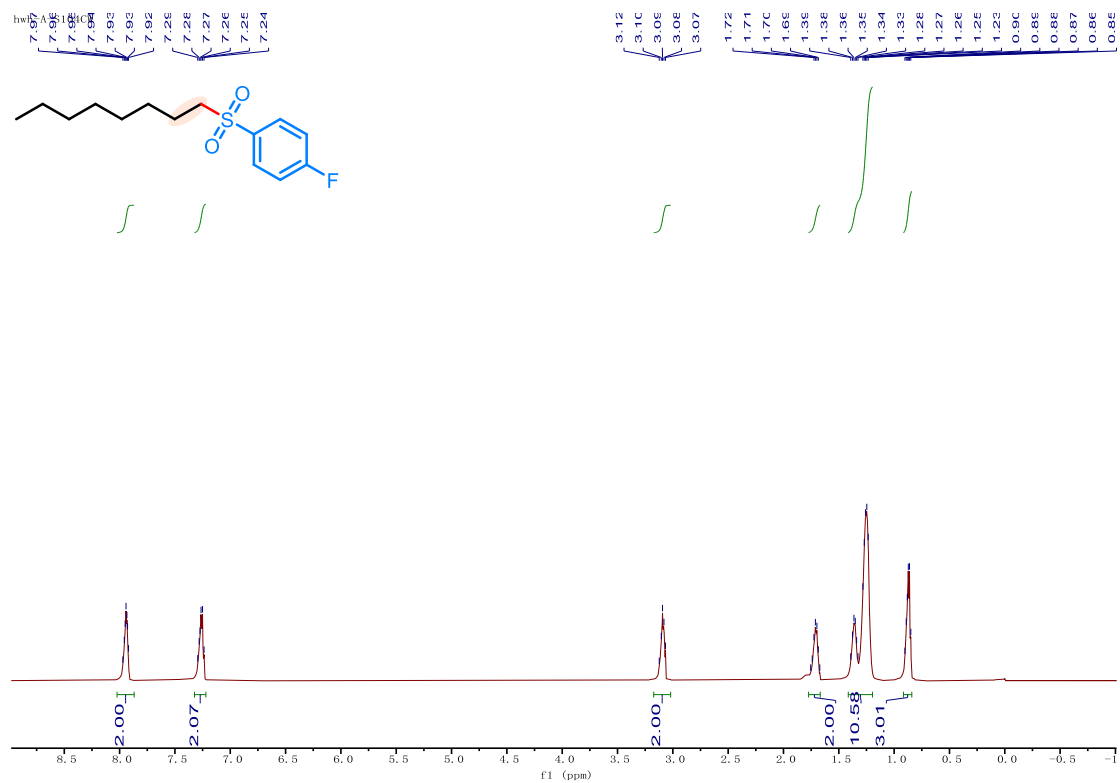

**<sup>13</sup>C {<sup>1</sup>H} NMR Spectrum of 43 (CDCl<sub>3</sub> as solvent, 151 MHz)**

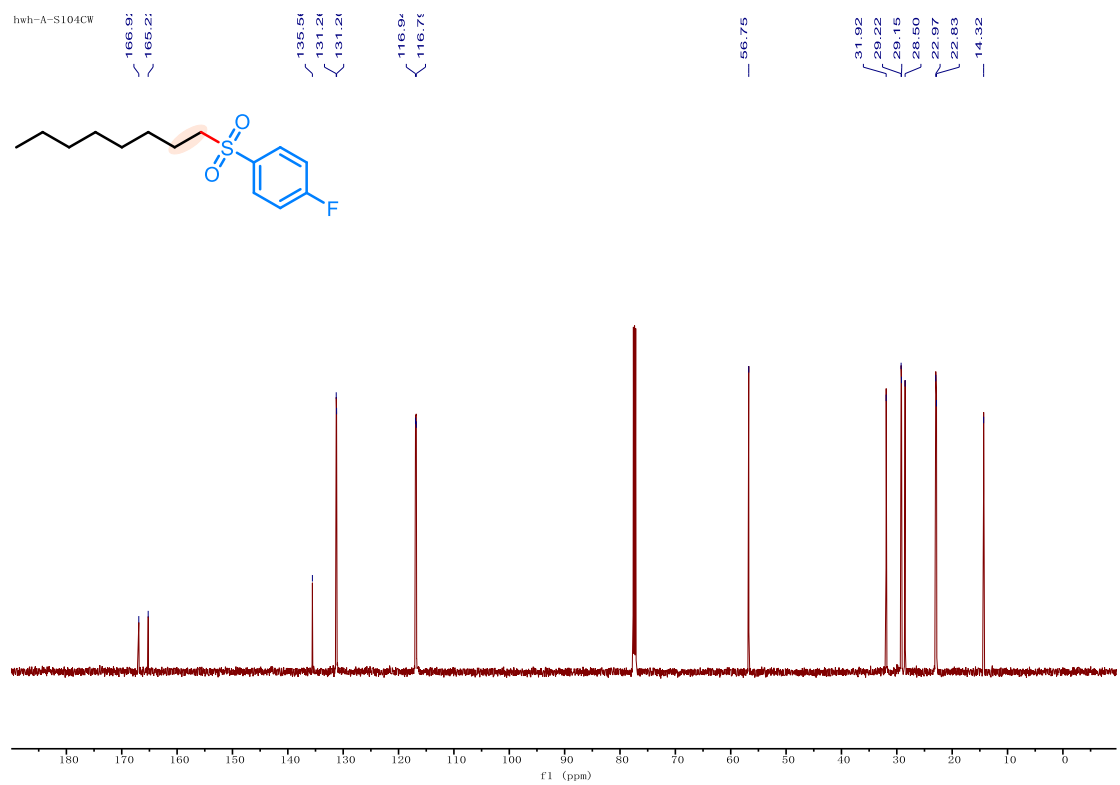

**$^{19}\text{F}$  { $^1\text{H}$ } NMR Spectrum of 43 ( $\text{CDCl}_3$  as solvent, 151 MHz)**

S104FCW

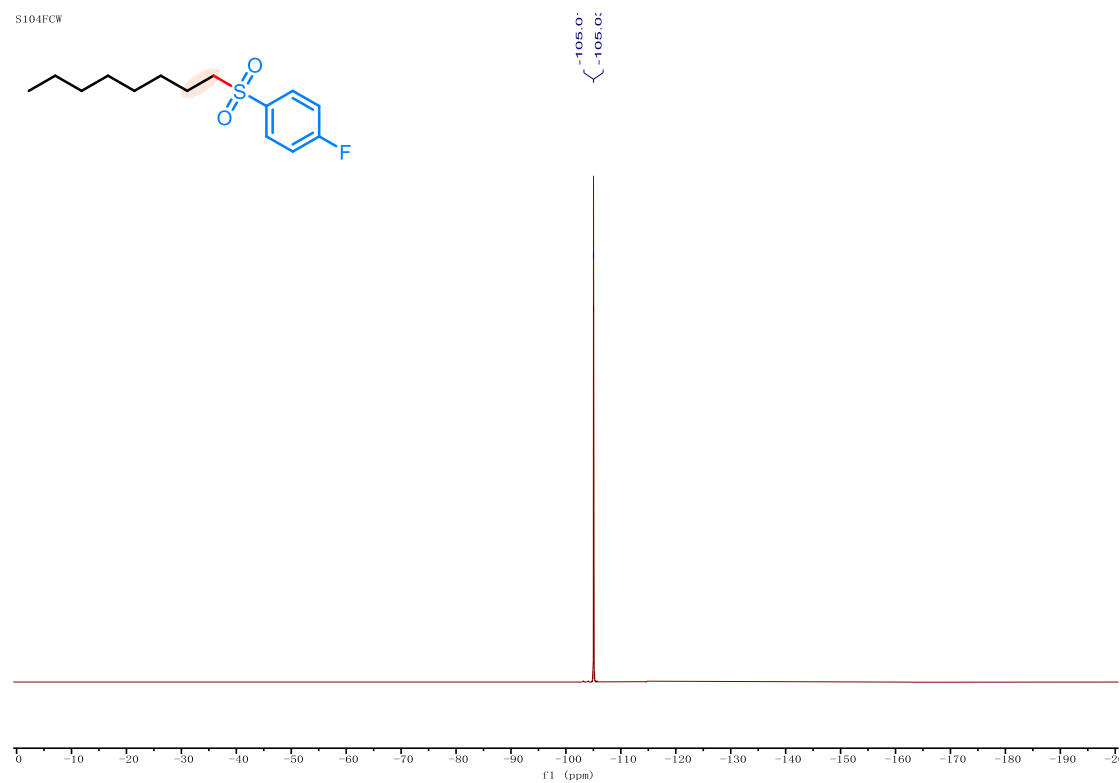

**<sup>1</sup>H NMR Spectrum of 44 (CDCl<sub>3</sub> as solvent, 400 MHz)**

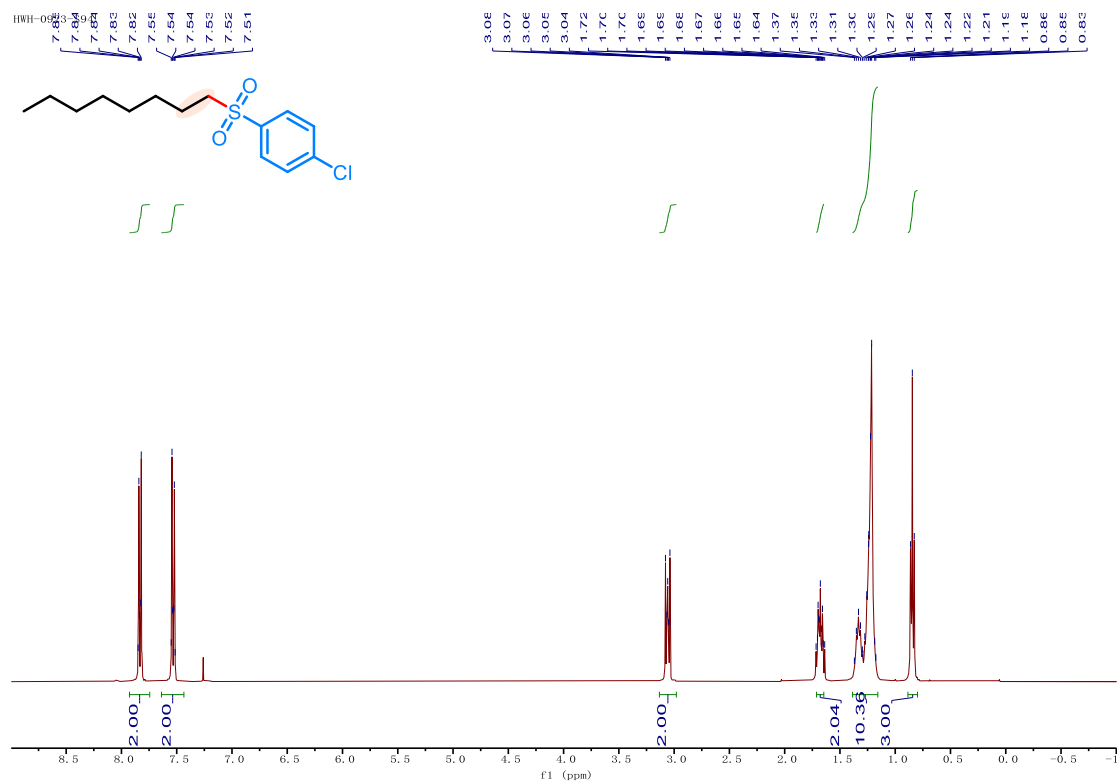

**<sup>13</sup>C {<sup>1</sup>H} NMR Spectrum of 44 (CDCl<sub>3</sub> as solvent, 101 MHz)**

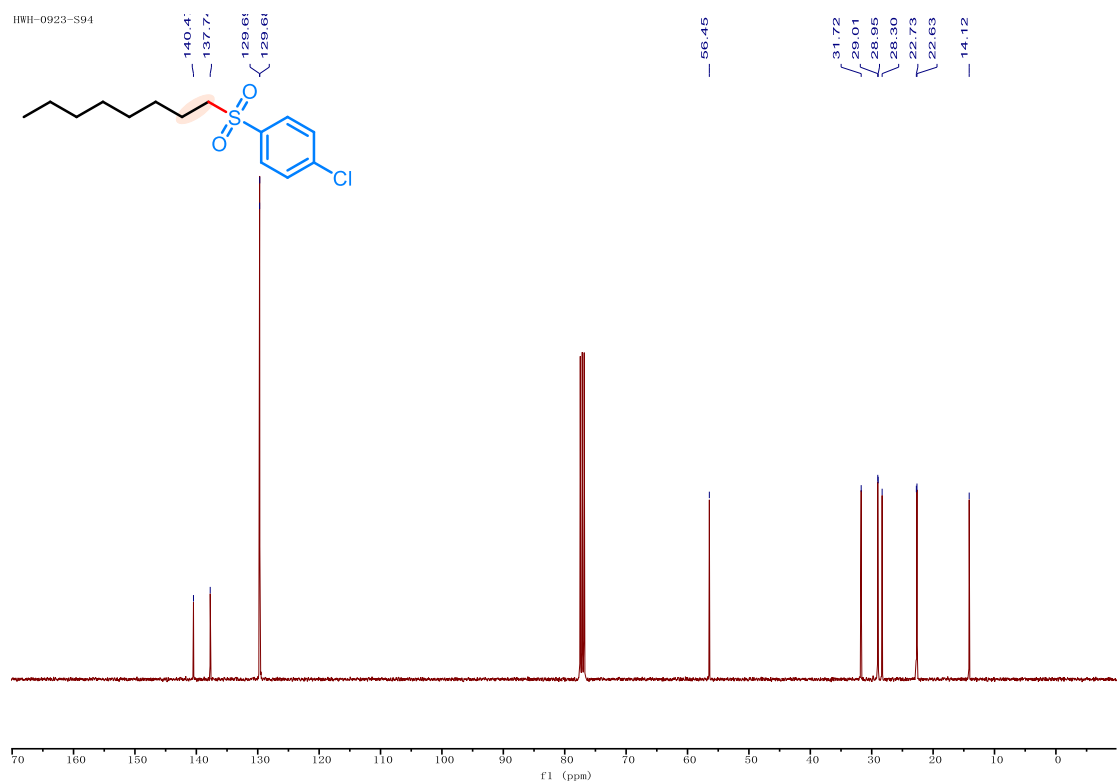



# <sup>1</sup>H NMR Spectrum of 45 (CDCl<sub>3</sub> as solvent, 400 MHz)

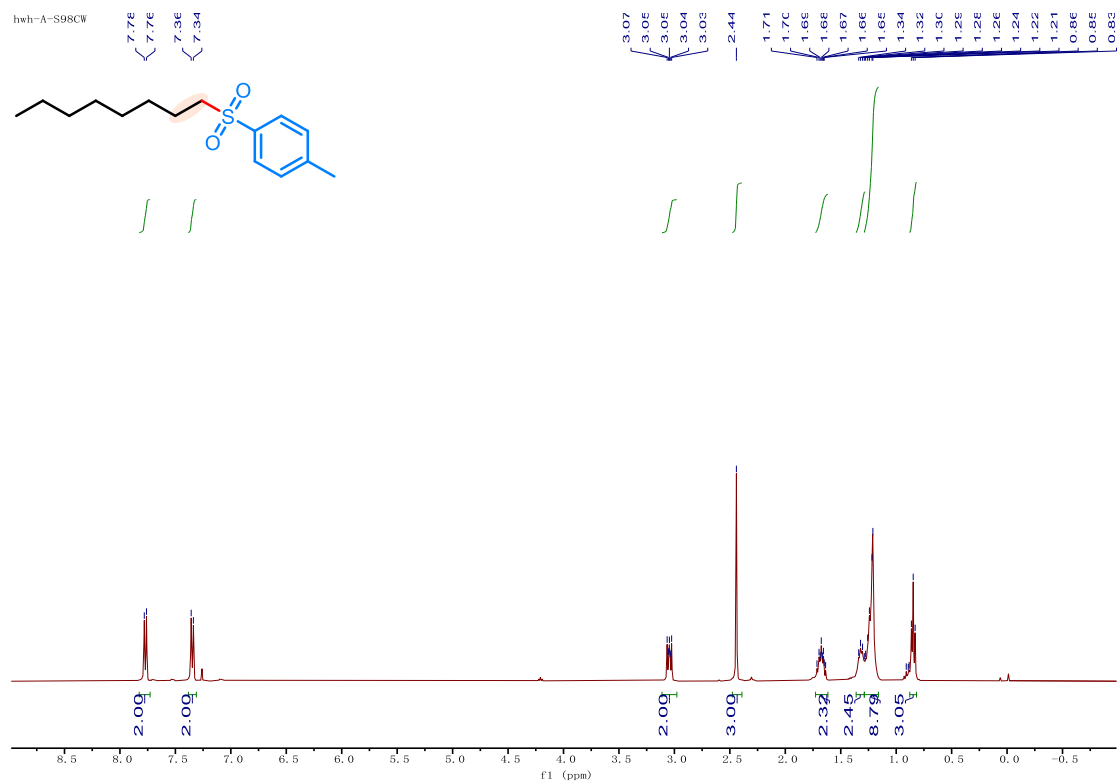

# <sup>13</sup>C {<sup>1</sup>H} NMR Spectrum of 45 (CDCl<sub>3</sub> as solvent, 151 MHz)

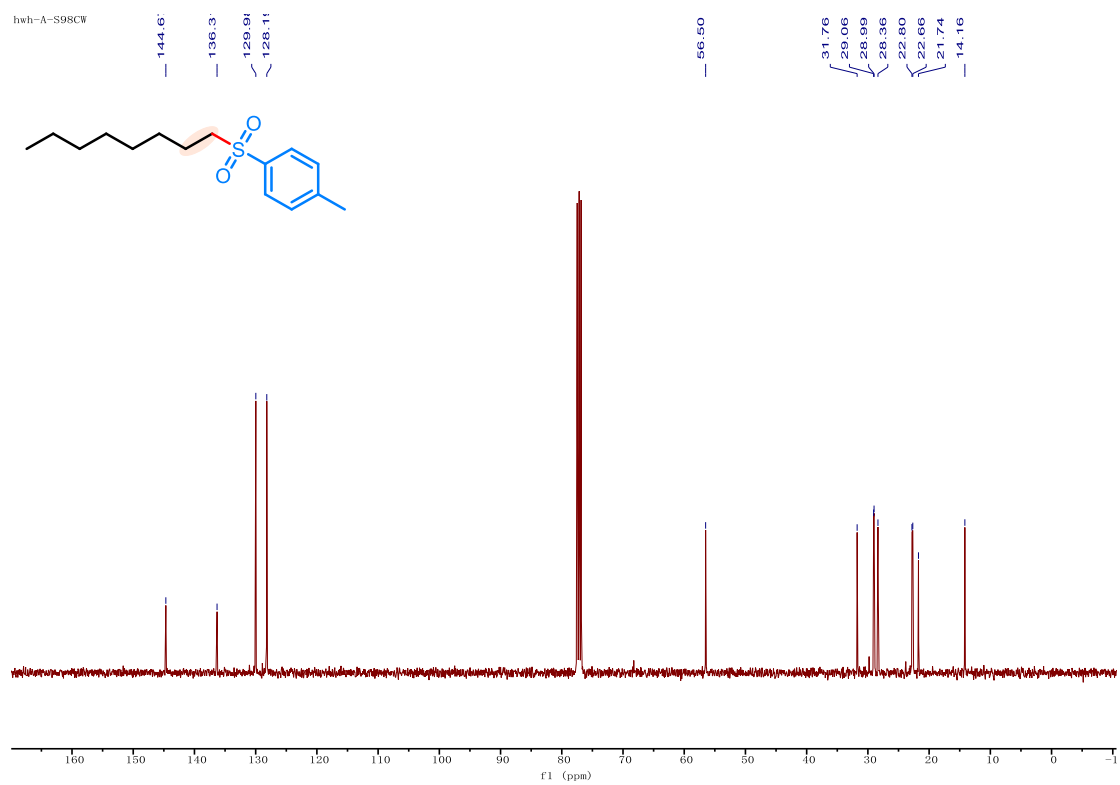

**$^1\text{H}$  NMR Spectrum of 46 ( $\text{CDCl}_3$  as solvent, 400 MHz)**

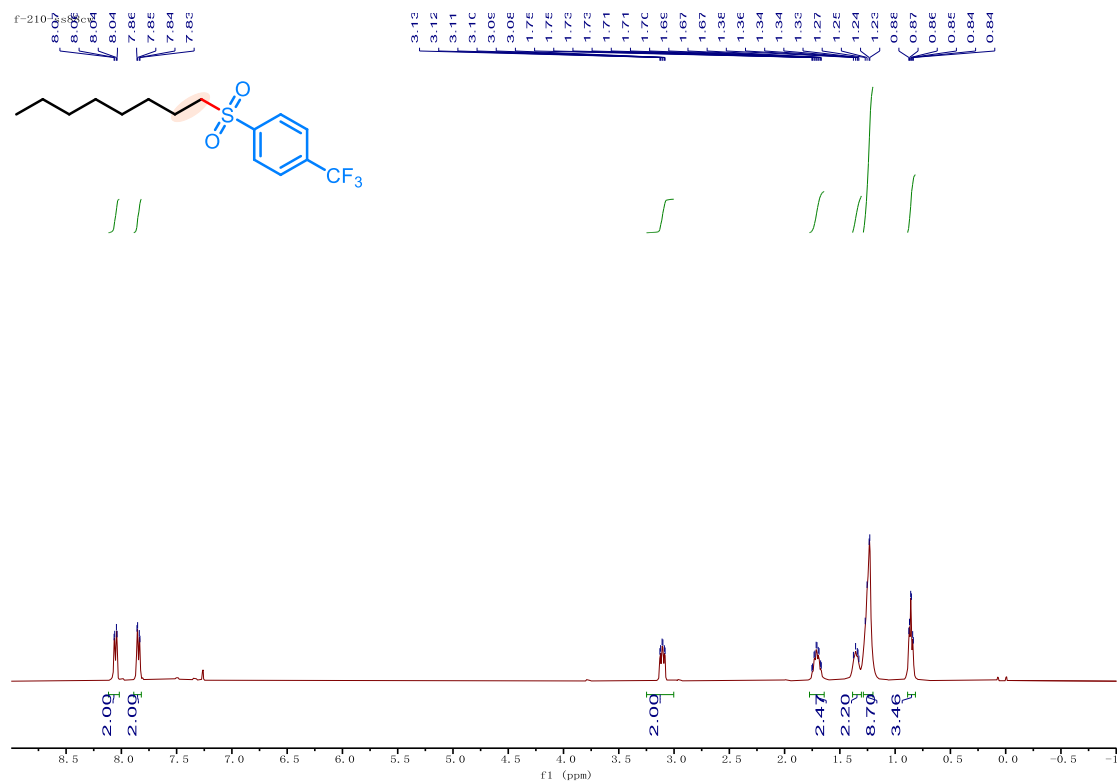

**$^{13}\text{C}$   $\{^1\text{H}\}$  NMR Spectrum of 46 ( $\text{CDCl}_3$  as solvent, 101 MHz)**

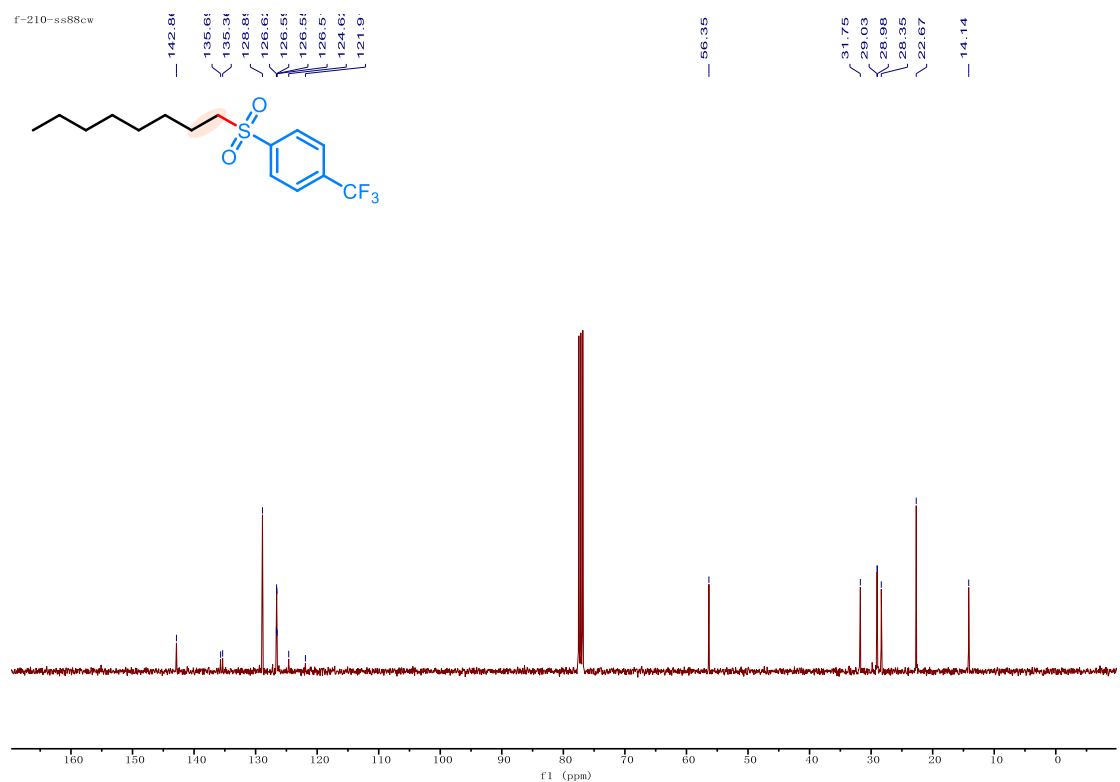

**$^{19}\text{F}$  { $^1\text{H}$ } NMR Spectrum of 46 (CDCl<sub>3</sub> as solvent, 151 MHz)**

f-210-ss88cw

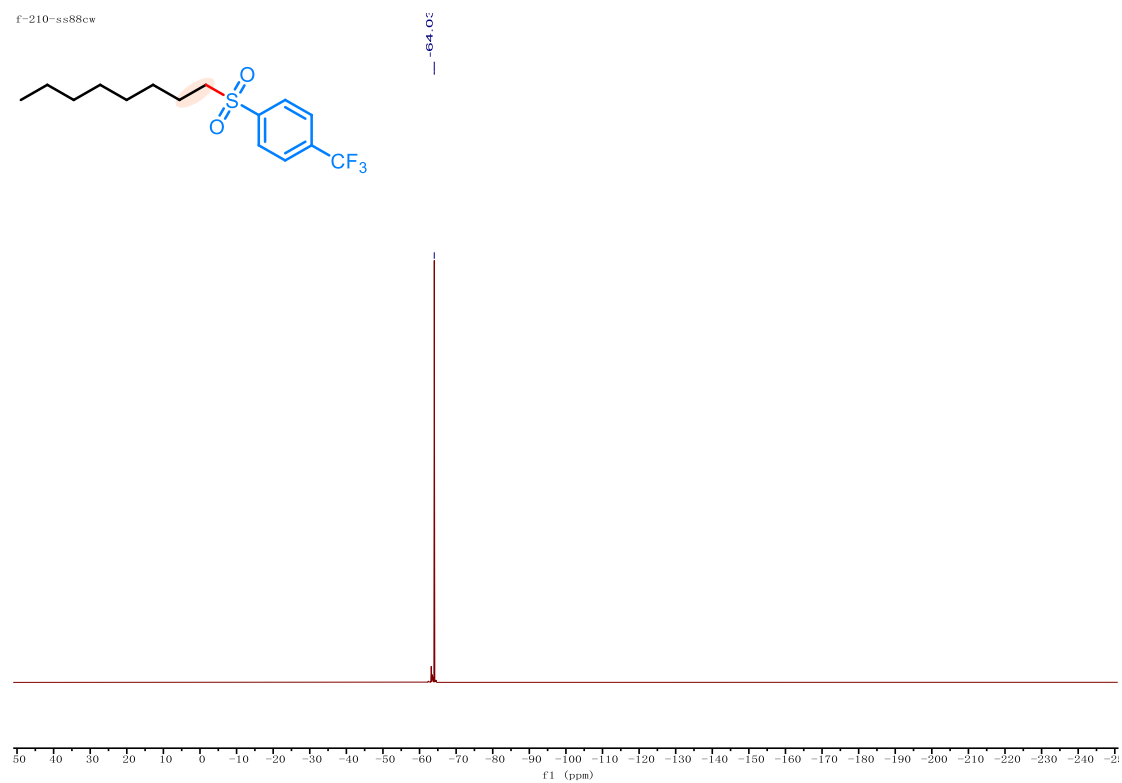

**<sup>1</sup>H NMR Spectrum of 47 (CDCl<sub>3</sub> as solvent, 400 MHz)**

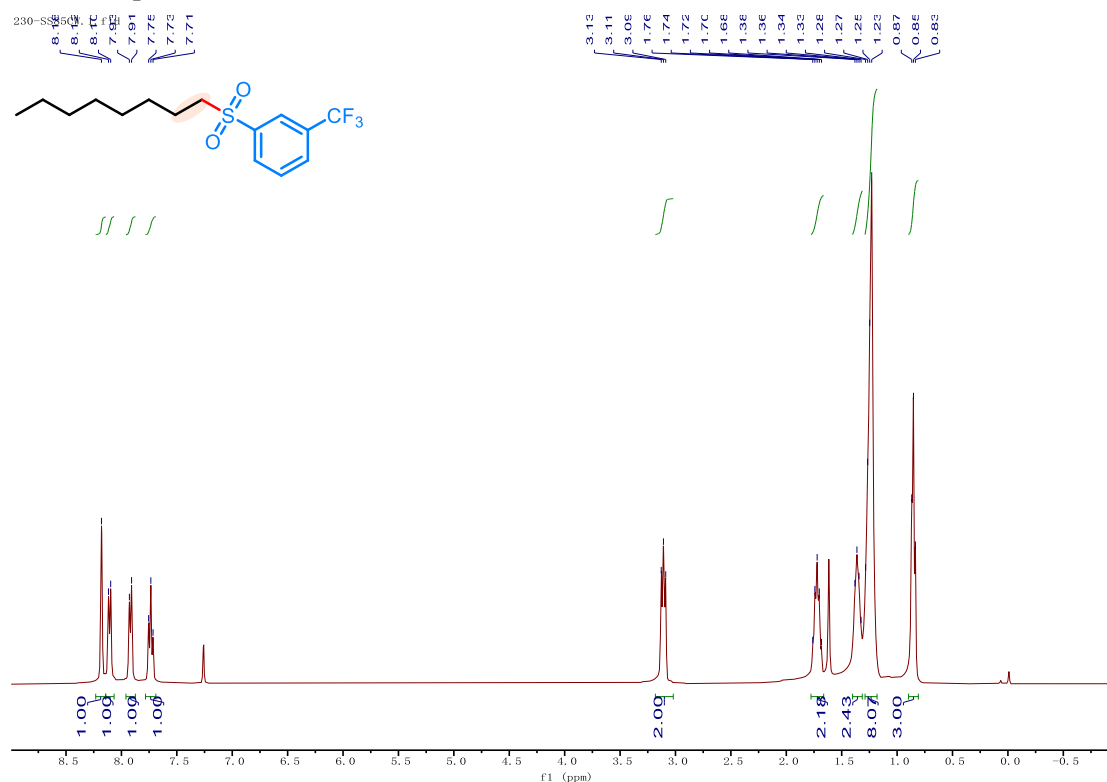

**<sup>13</sup>C {<sup>1</sup>H} NMR Spectrum of 47 (CDCl<sub>3</sub> as solvent, 101 MHz)**

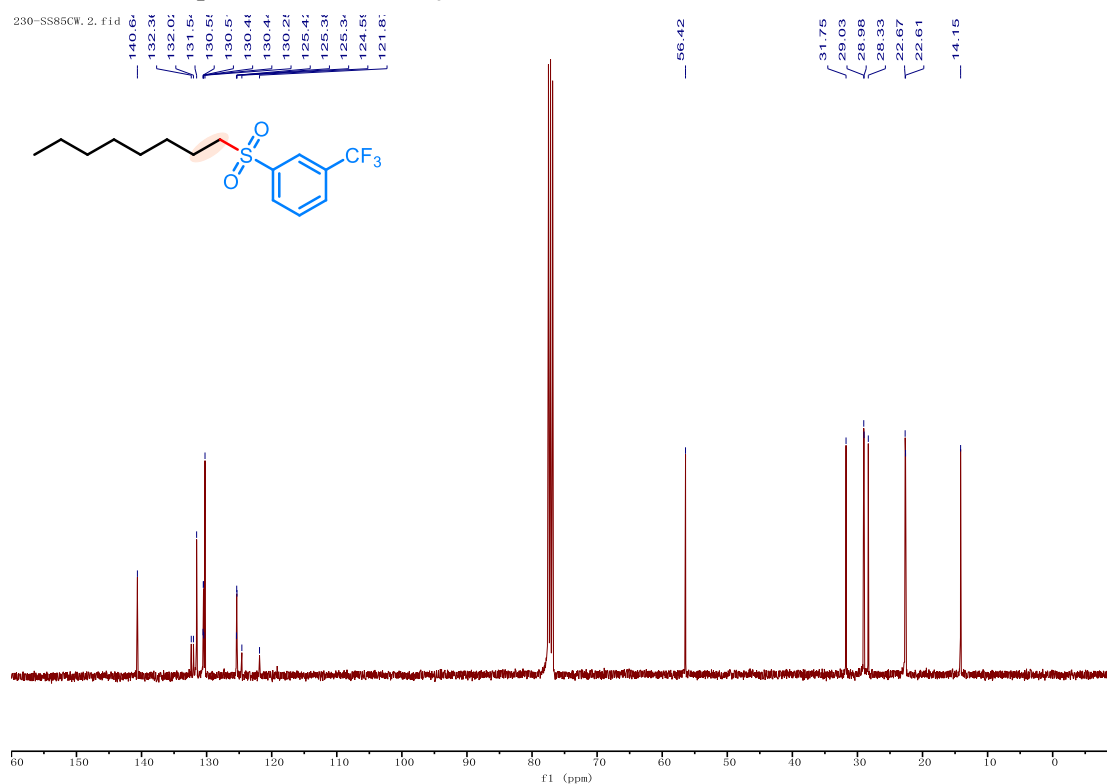

**$^{19}\text{F}$  { $^1\text{H}$ } NMR Spectrum of 47 (CDCl<sub>3</sub> as solvent, 101 MHz)**

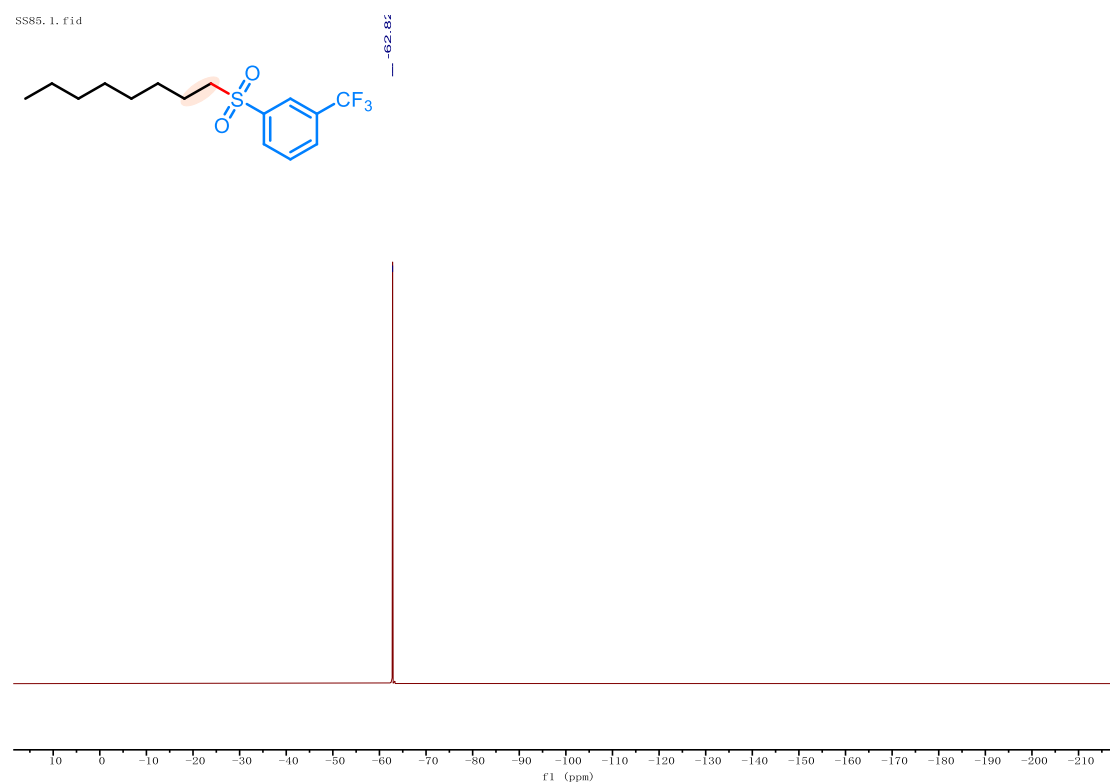

**$^1\text{H}$  NMR Spectrum of 48 ( $\text{CDCl}_3$  as solvent, 400 MHz)**

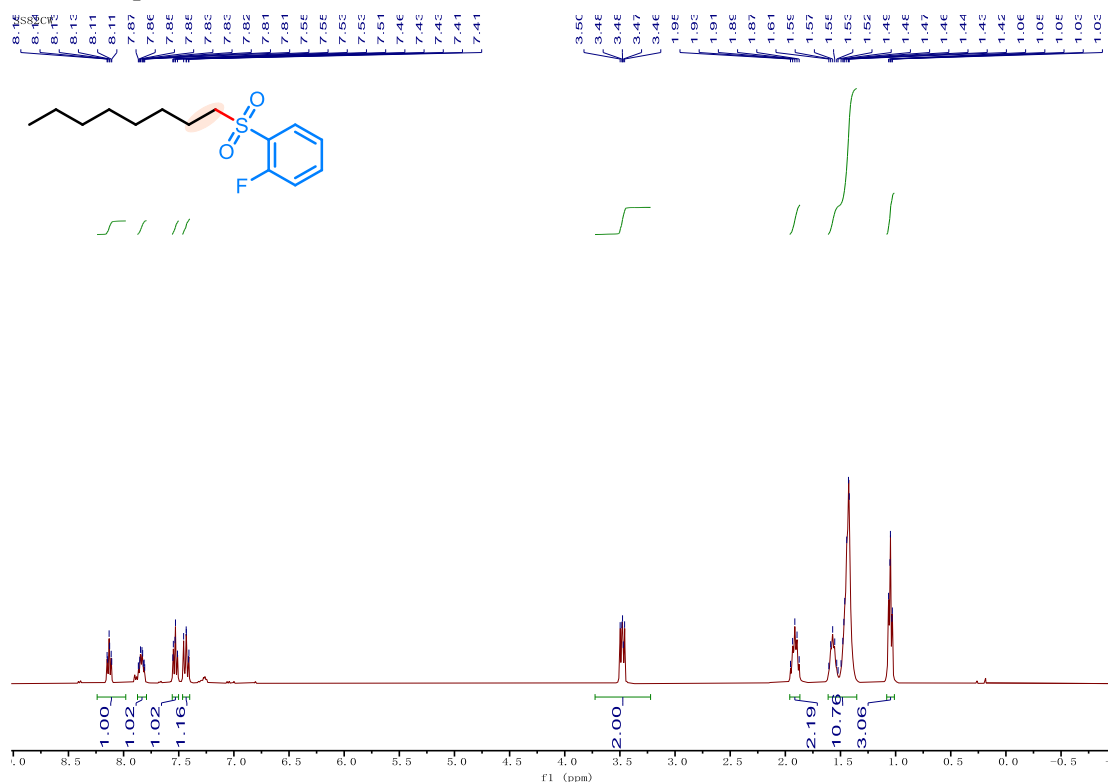

**$^{13}\text{C}$  ( $^1\text{H}$ ) NMR Spectrum of 48 ( $\text{CDCl}_3$  as solvent, 101 MHz)**

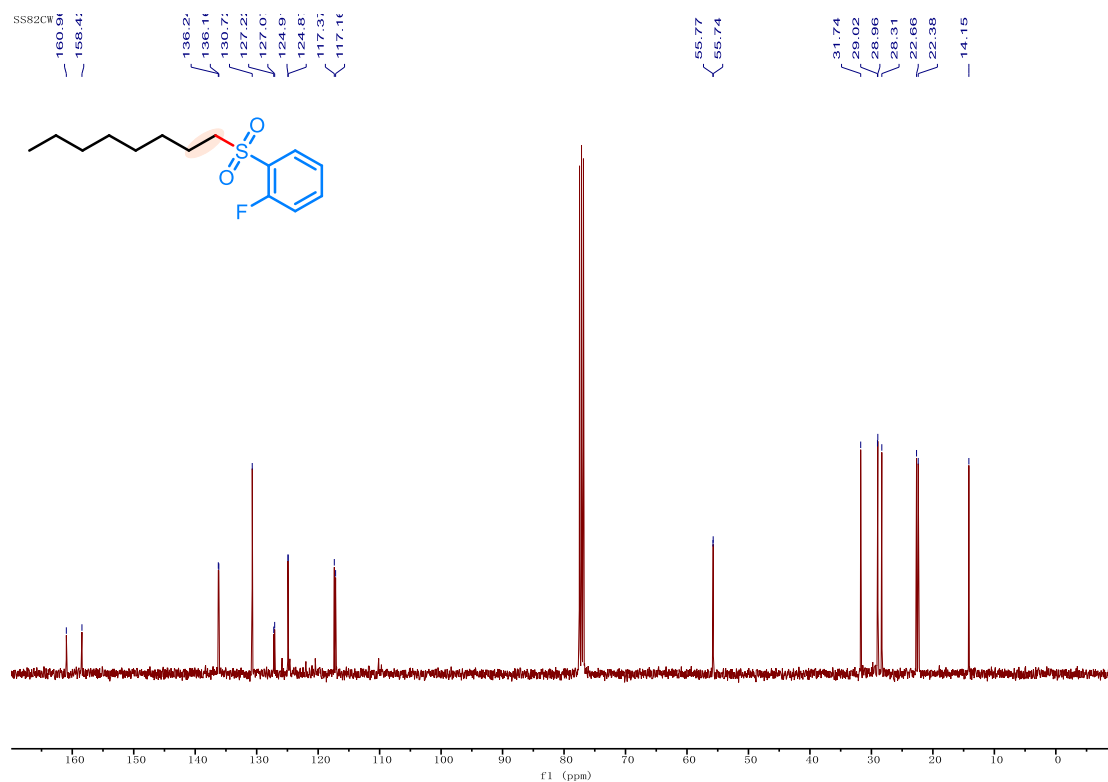

**$^{19}\text{F}$  { $^1\text{H}$ } NMR Spectrum of 48 ( $\text{CDCl}_3$  as solvent, 101 MHz)**

f-S82.1.fid

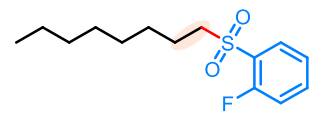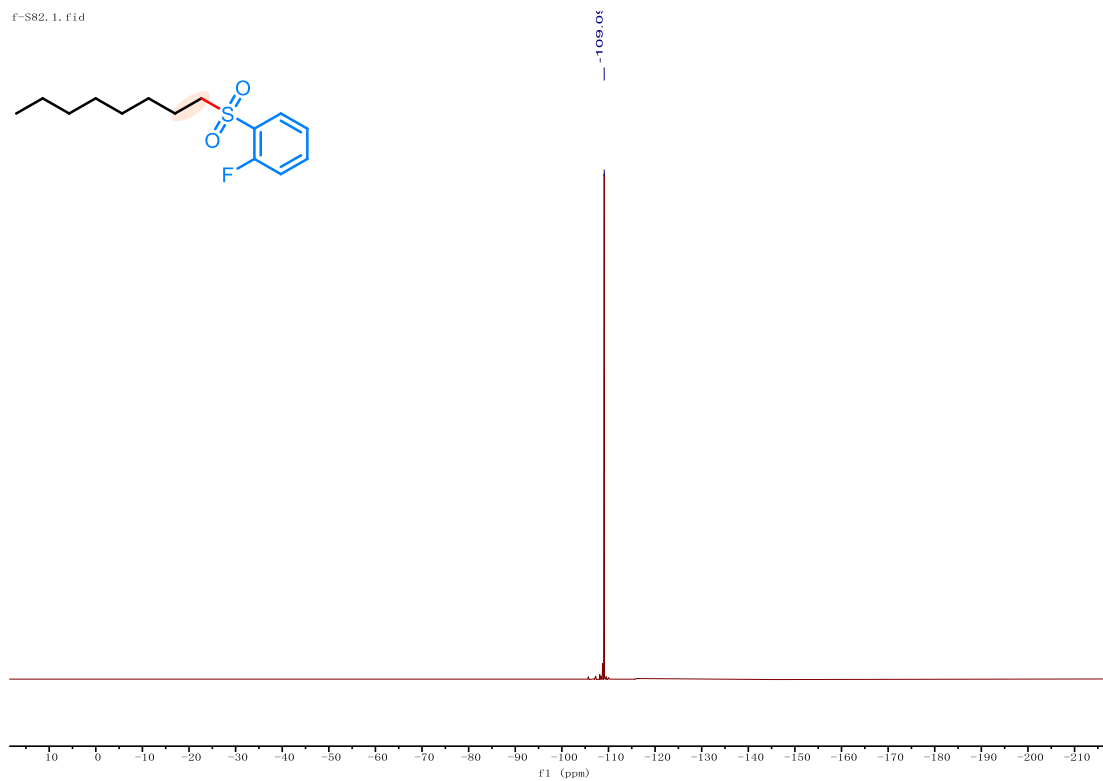

## hwh-A-S91CW

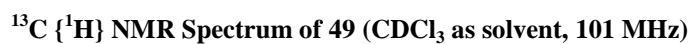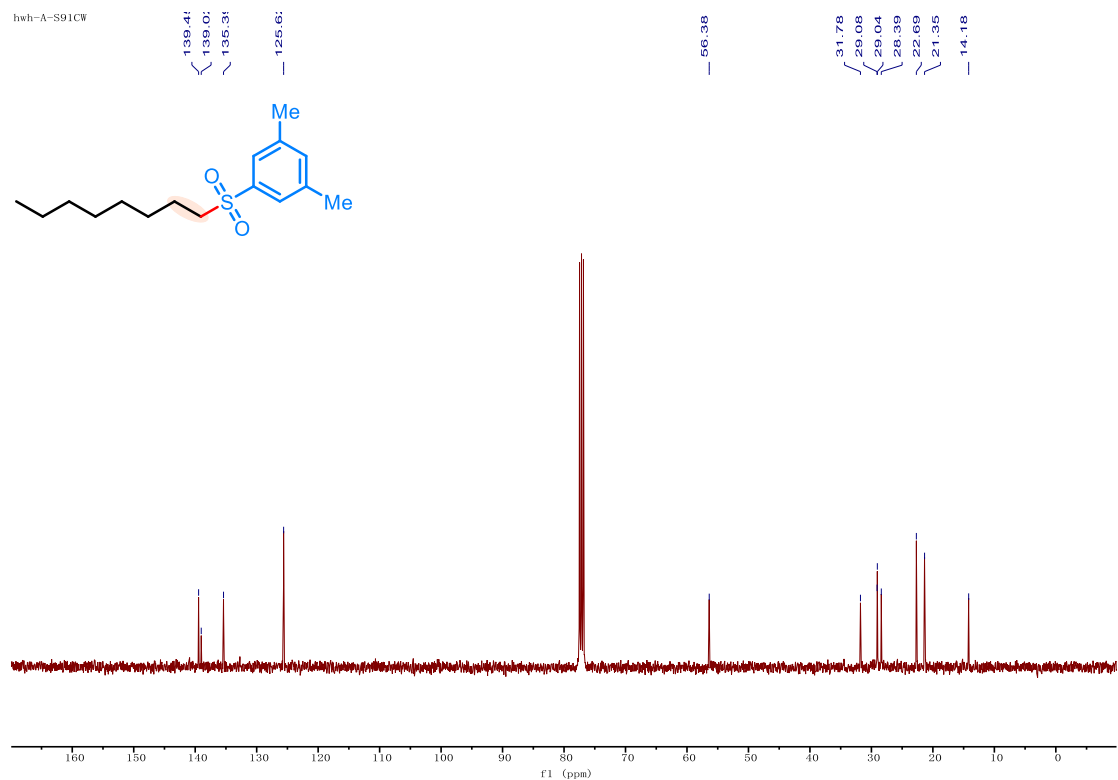



[illegible]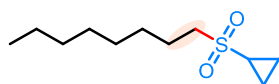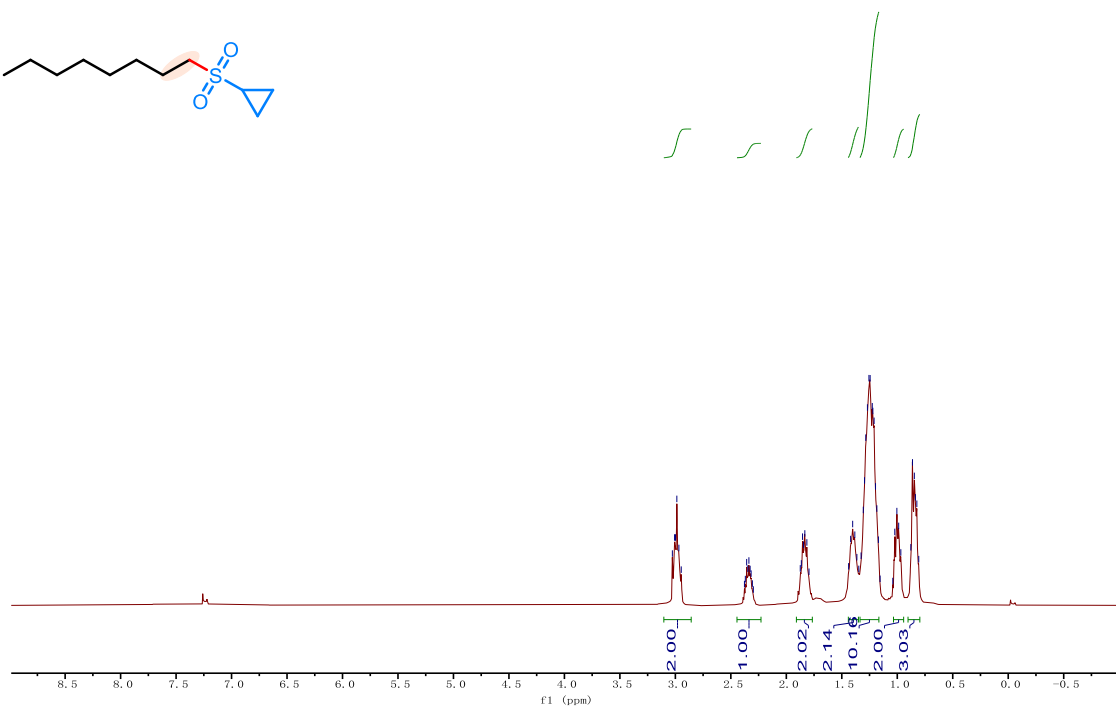

# hwh-A-S101CW-2

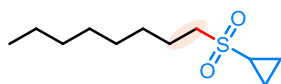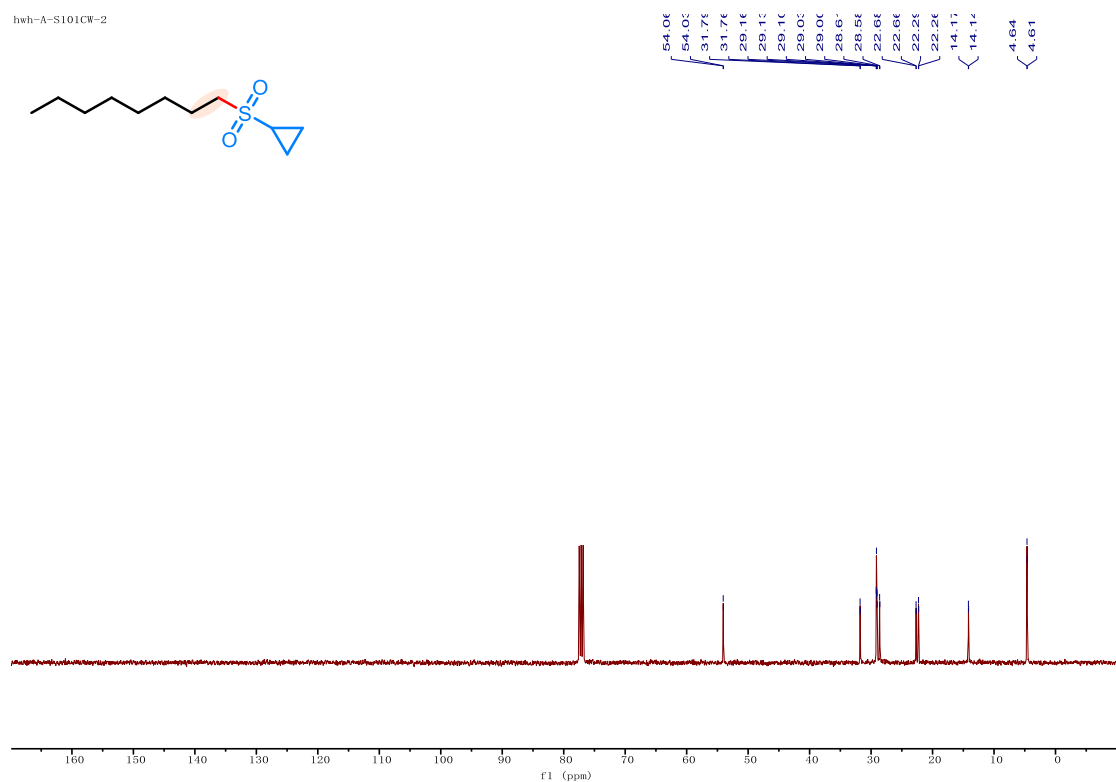

**<sup>1</sup>H NMR Spectrum of 51 (CDCl<sub>3</sub> as solvent, 600 MHz)**

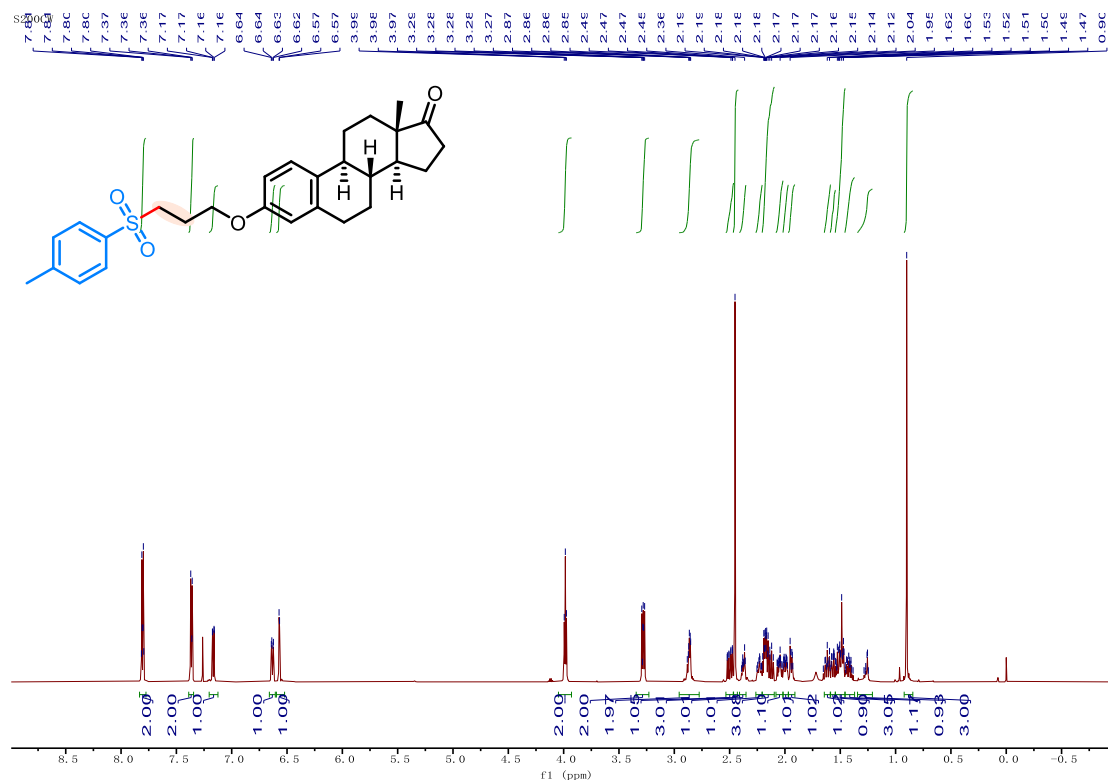

**<sup>13</sup>C {<sup>1</sup>H} NMR Spectrum of 51 (CDCl<sub>3</sub> as solvent, 101 MHz)**

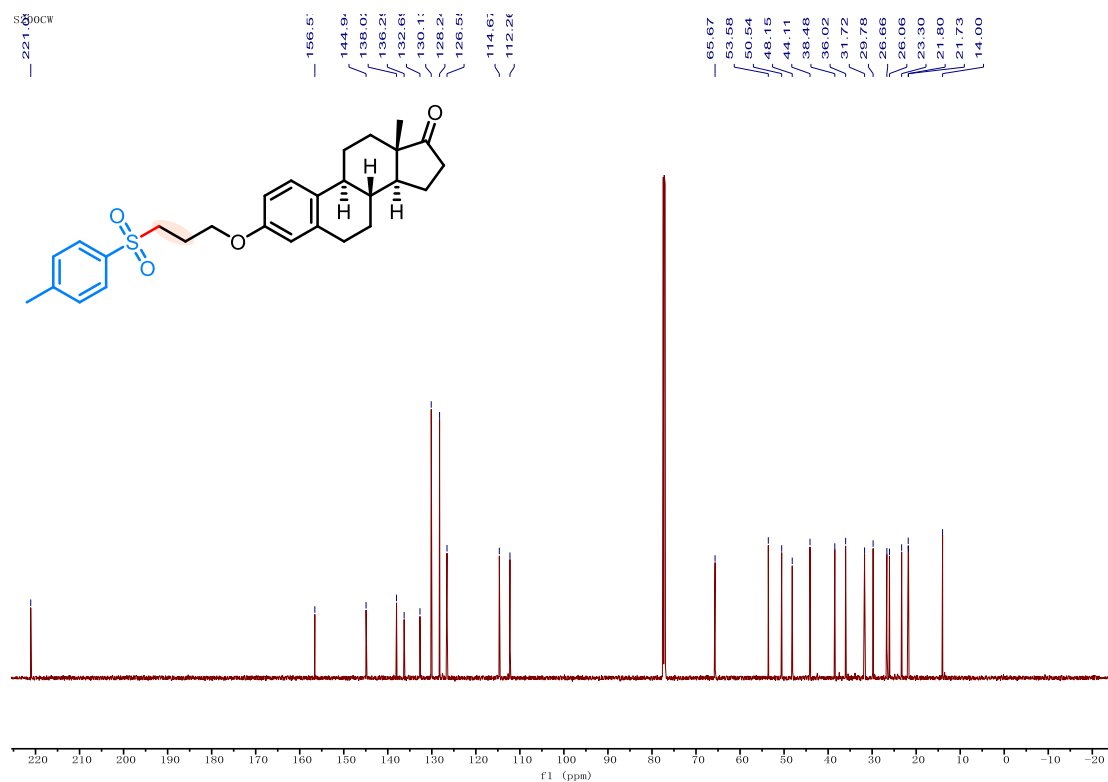

**$^1\text{H}$  NMR Spectrum of 52 ( $\text{CDCl}_3$  as solvent, 400 MHz)**

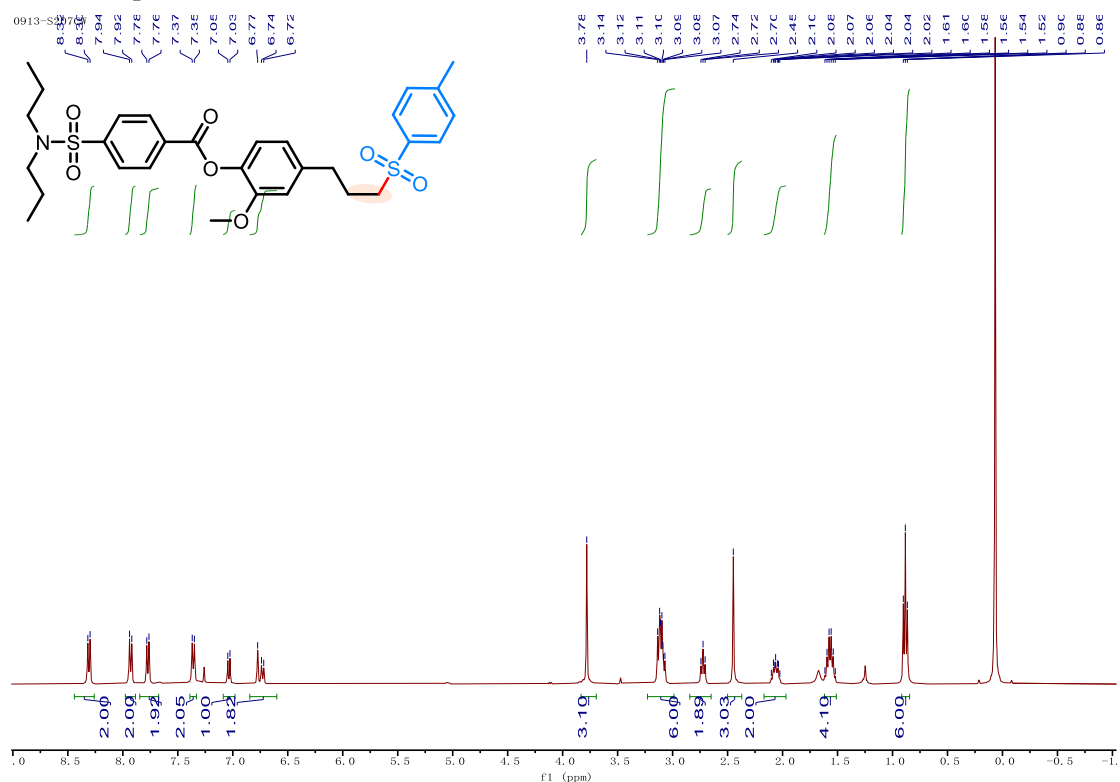

**$^{13}\text{C}$  ( $^1\text{H}$ ) NMR Spectrum of 52 ( $\text{CDCl}_3$  as solvent, 101 MHz)**

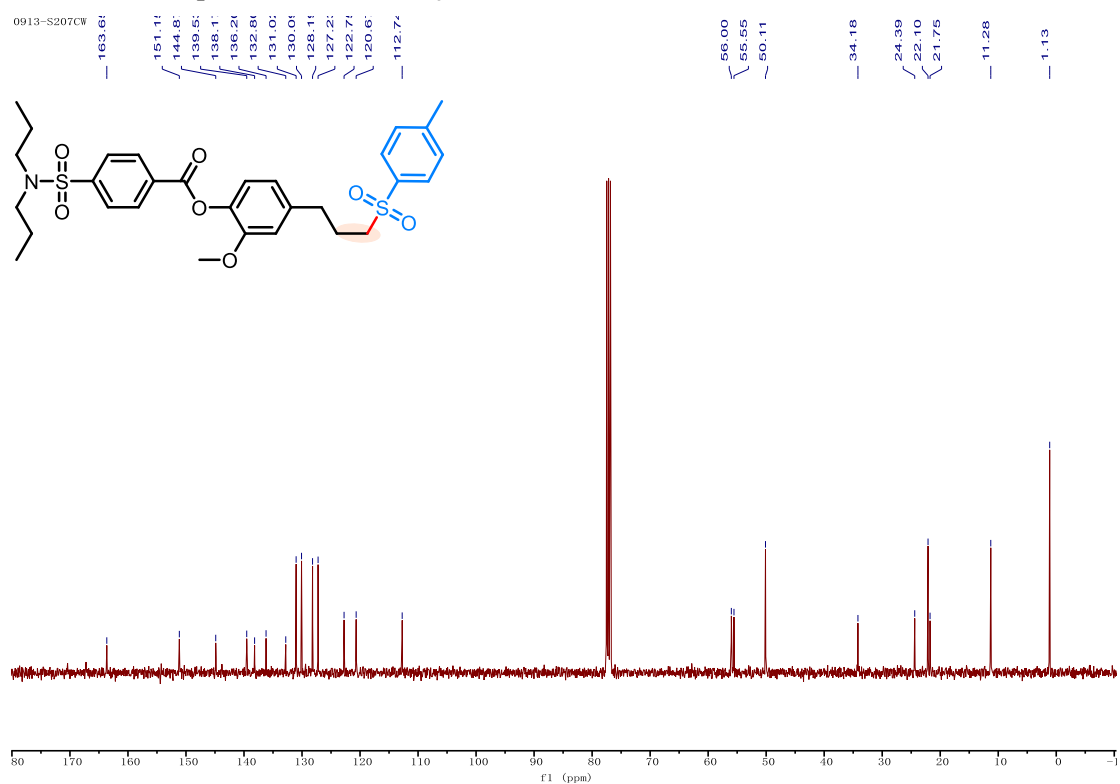

# <sup>1</sup>H NMR Spectrum of 53 (CDCl<sub>3</sub> as solvent, 400 MHz)

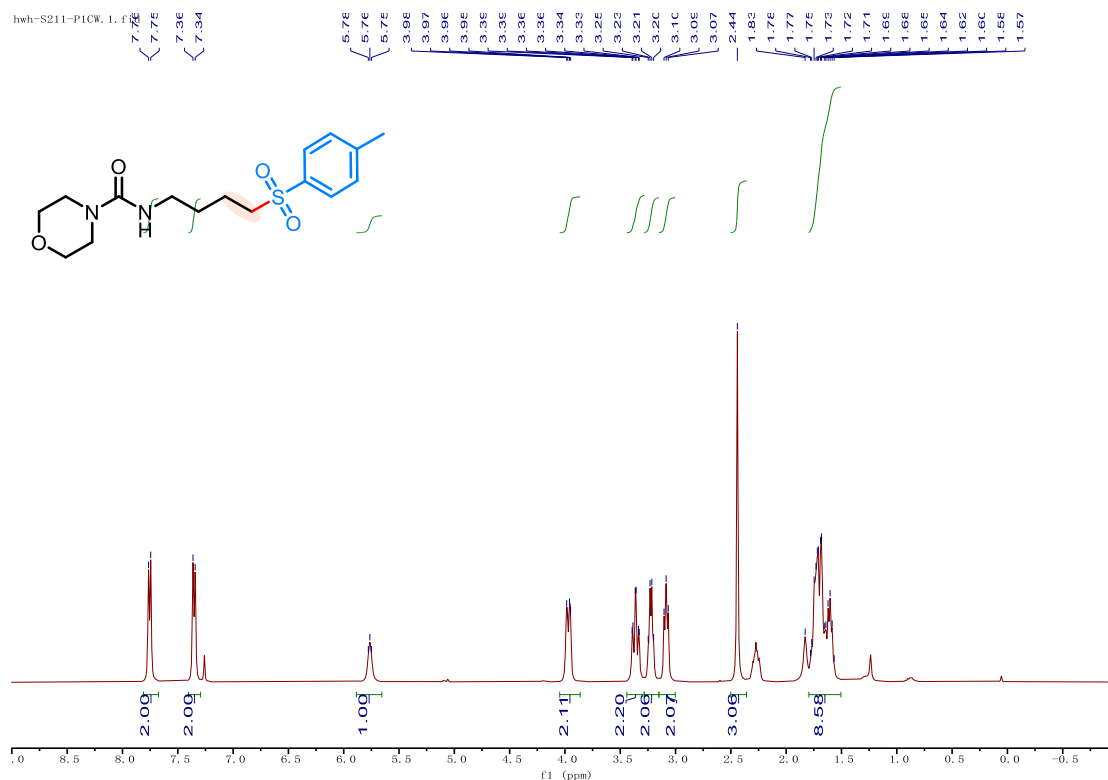

# <sup>13</sup>C {<sup>1</sup>H} NMR Spectrum of 53 (CDCl<sub>3</sub> as solvent, 101 MHz)

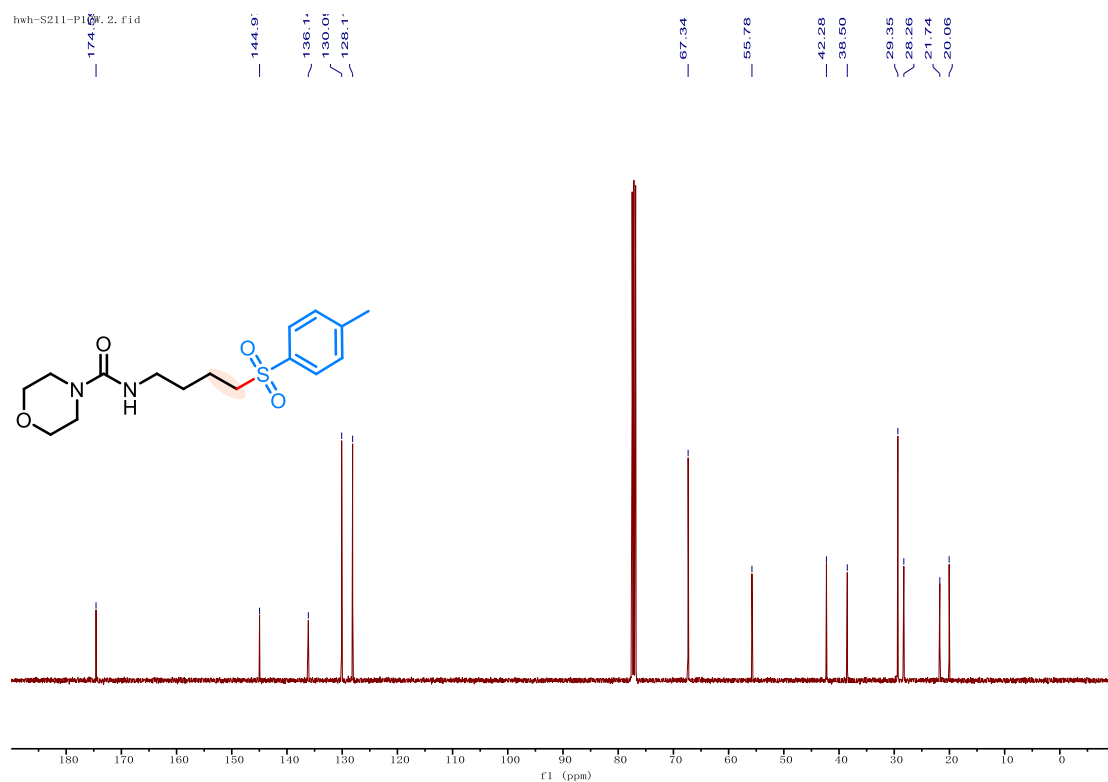

**$^1\text{H}$  NMR Spectrum of 54 ( $\text{CDCl}_3$  as solvent, 400 MHz)**

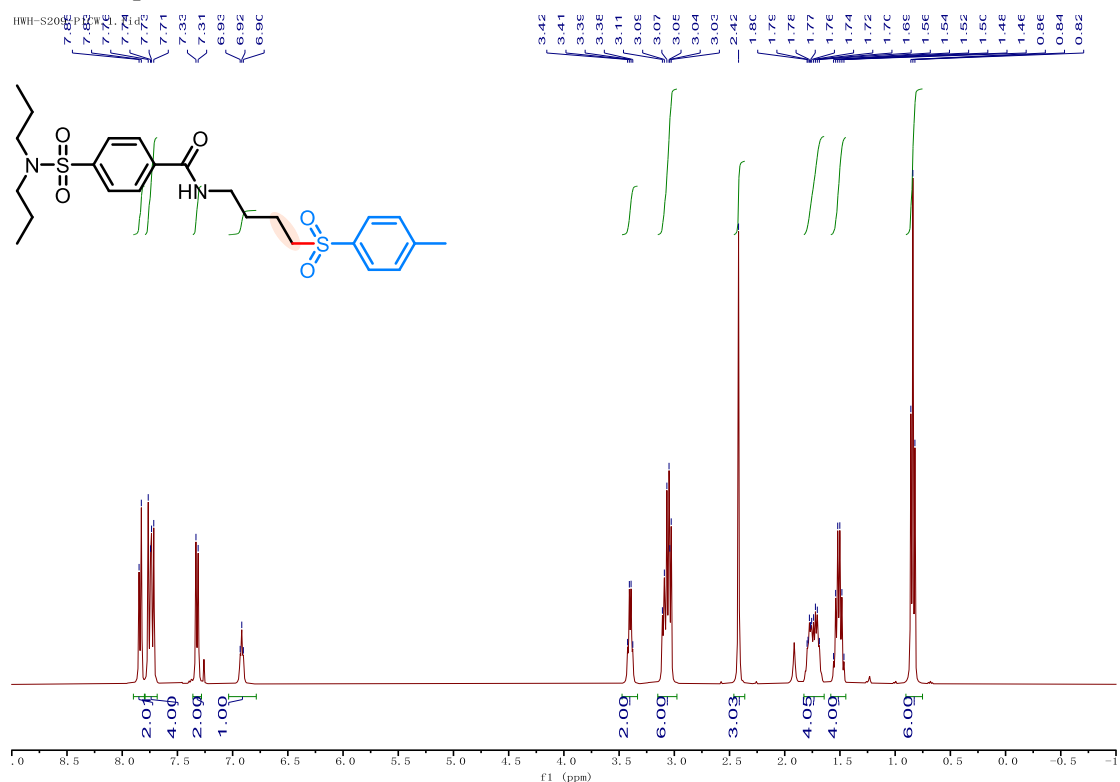

**$^{13}\text{C}$  ( $^1\text{H}$ ) NMR Spectrum of 54 ( $\text{CDCl}_3$  as solvent, 101 MHz)**

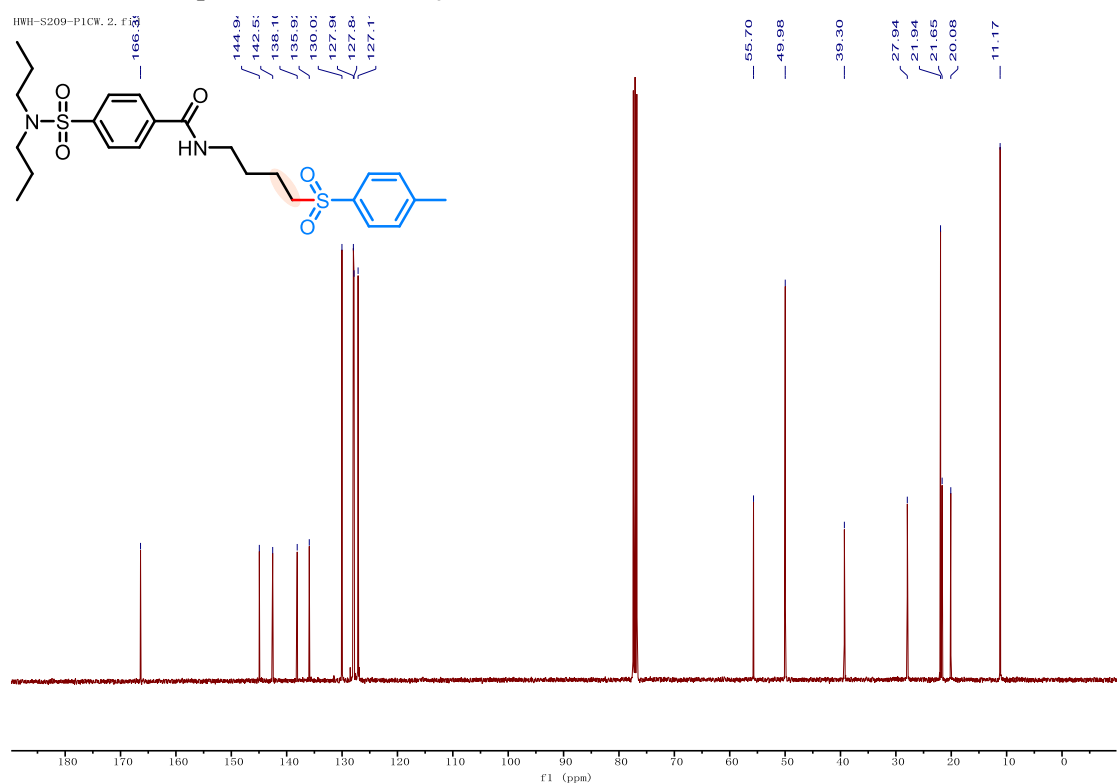

# **<sup>1</sup>H NMR Spectrum of 55 (CDCl<sub>3</sub> as solvent, 400 MHz)**

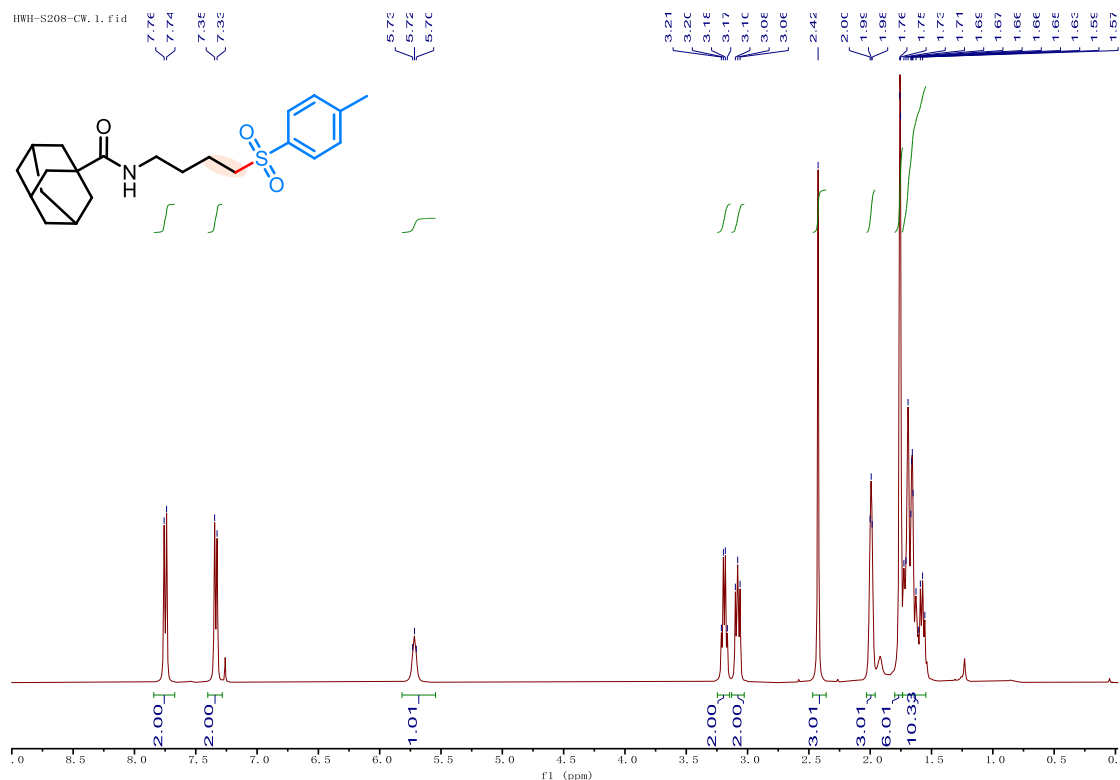

## **<sup>13</sup>C {<sup>1</sup>H} NMR Spectrum of 55 (CDCl<sub>3</sub> as solvent, 101 MHz)**

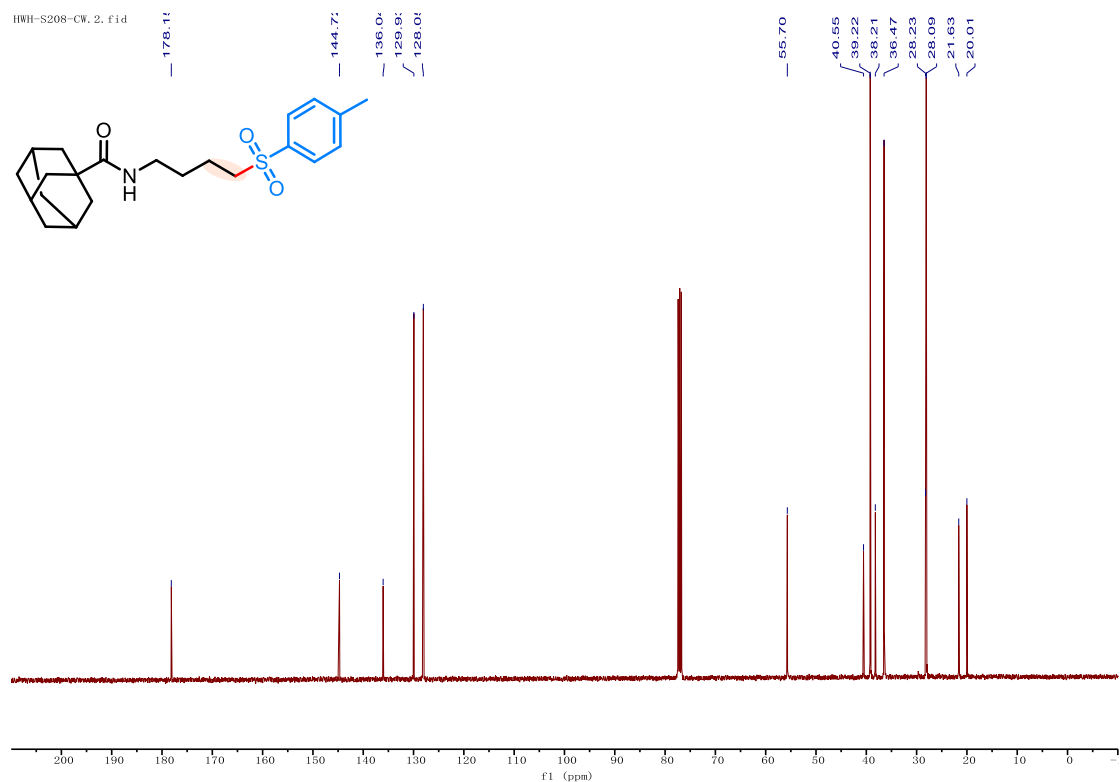

**<sup>1</sup>H NMR Spectrum of 56 (CDCl<sub>3</sub> as solvent, 600 MHz)**

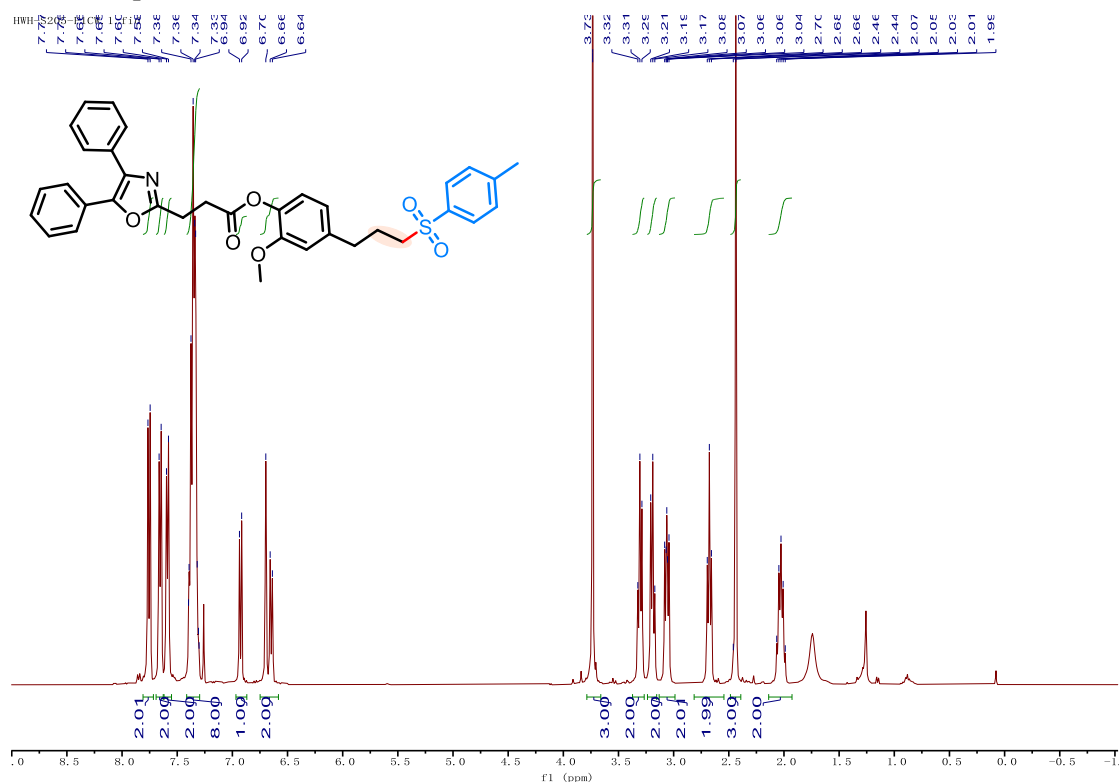

**<sup>13</sup>C {<sup>1</sup>H} NMR Spectrum of 56 (CDCl<sub>3</sub> as solvent, 101 MHz)**

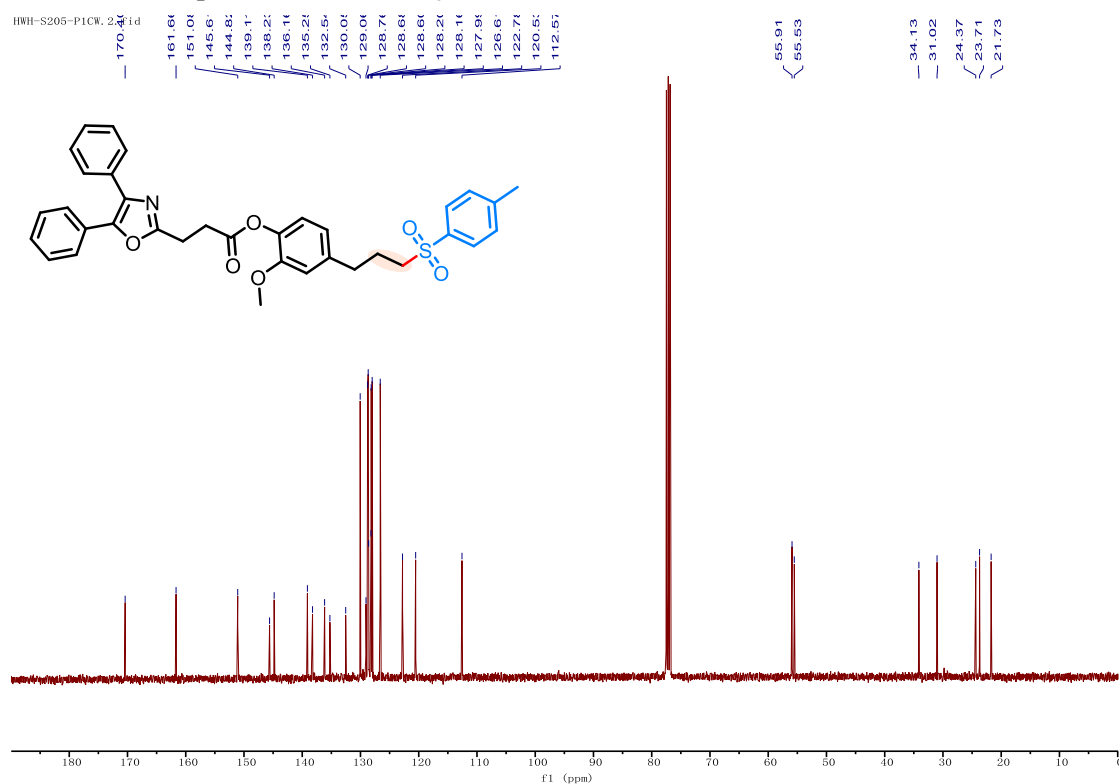

**$^1\text{H}$  NMR Spectrum of 57 ( $\text{CDCl}_3$  as solvent, 400 MHz)**

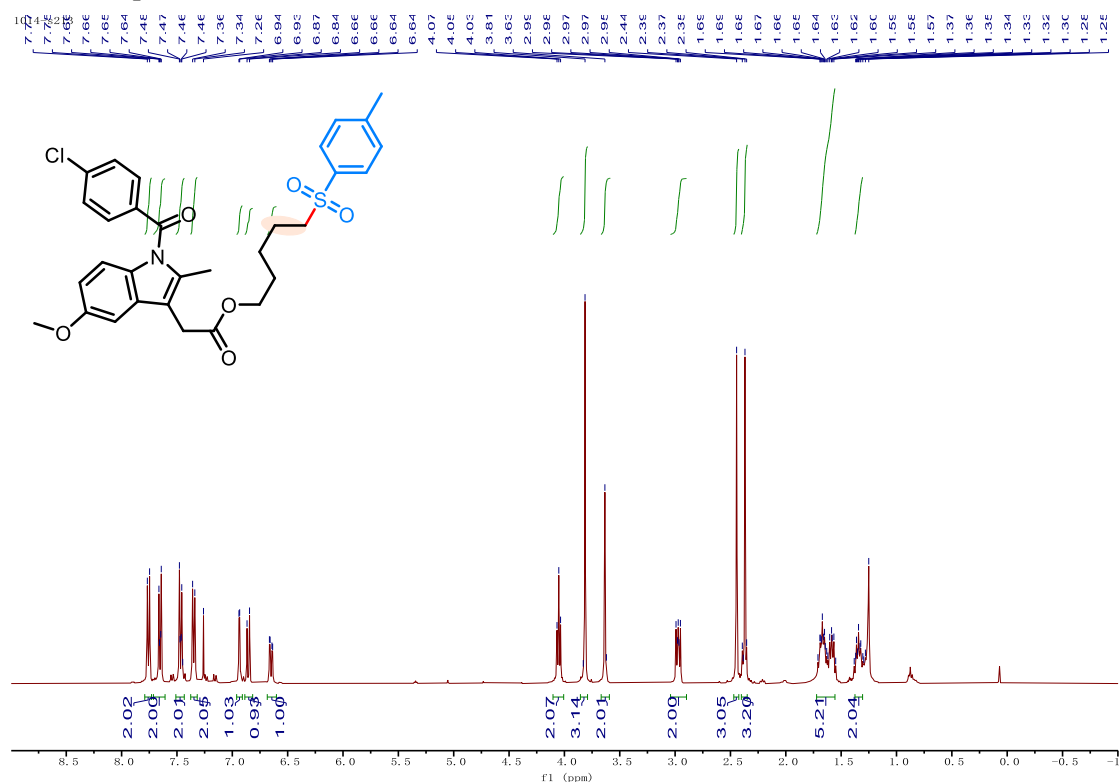

**$^{13}\text{C}$   $\{^1\text{H}\}$  NMR Spectrum of 57 ( $\text{CDCl}_3$  as solvent, 101 MHz)**

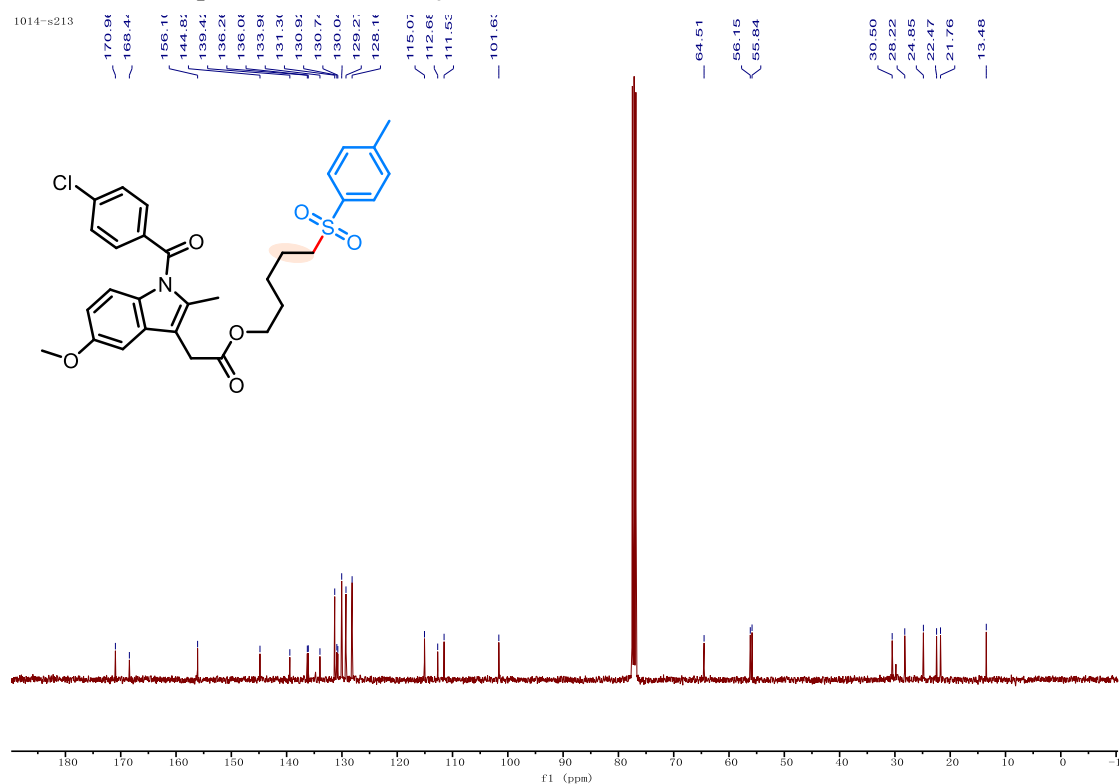



# <sup>1</sup>H NMR Spectrum of 58 (CDCl<sub>3</sub> as solvent, 400 MHz)

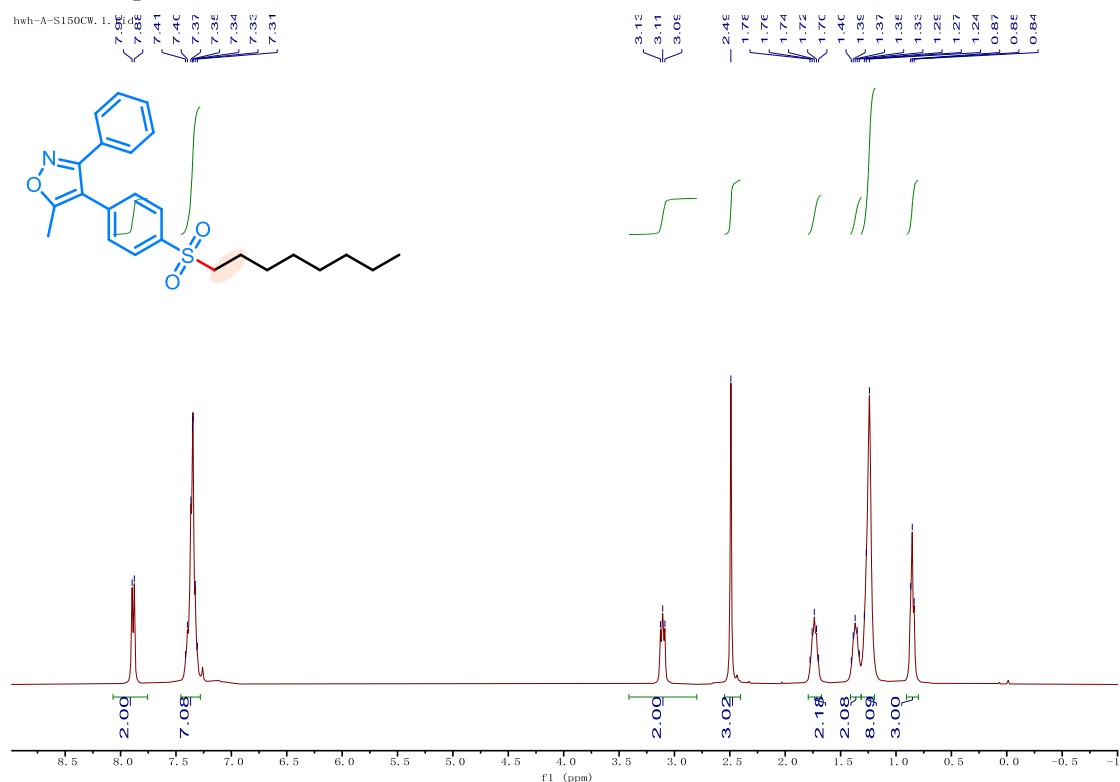

## <sup>13</sup>C {<sup>1</sup>H} NMR Spectrum of 58 (CDCl<sub>3</sub> as solvent, 101 MHz)

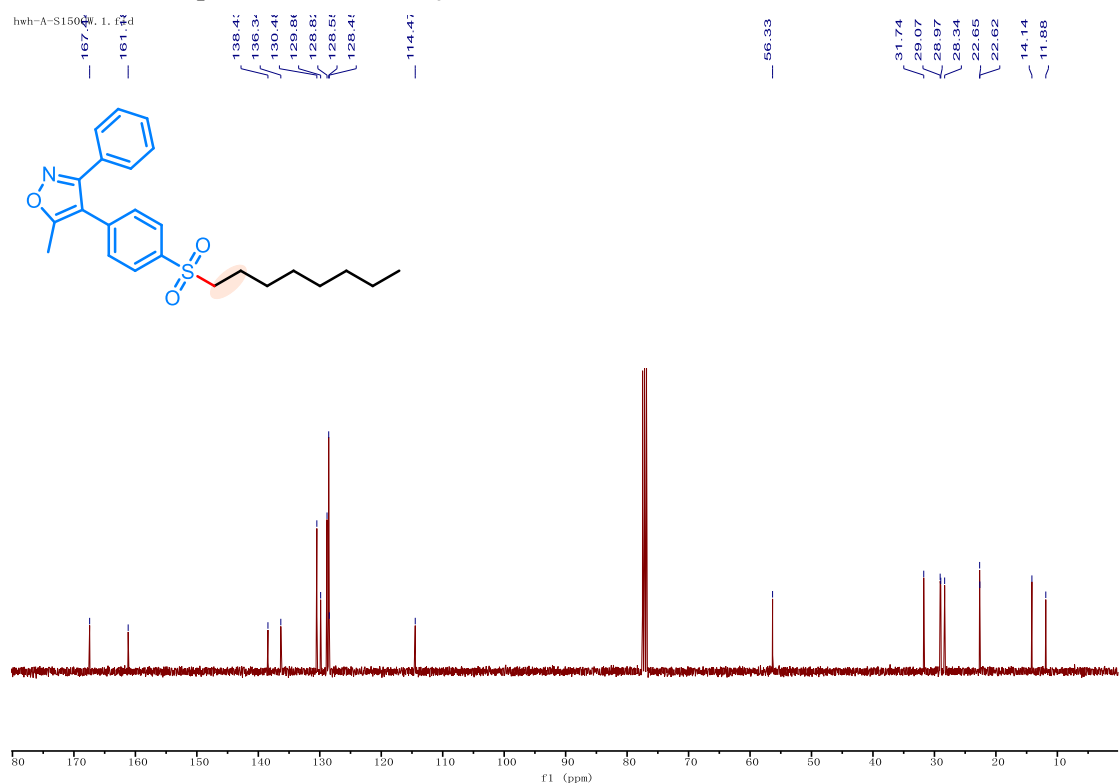

**<sup>1</sup>H NMR Spectrum of 59 (CDCl<sub>3</sub> as solvent, 400 MHz)**

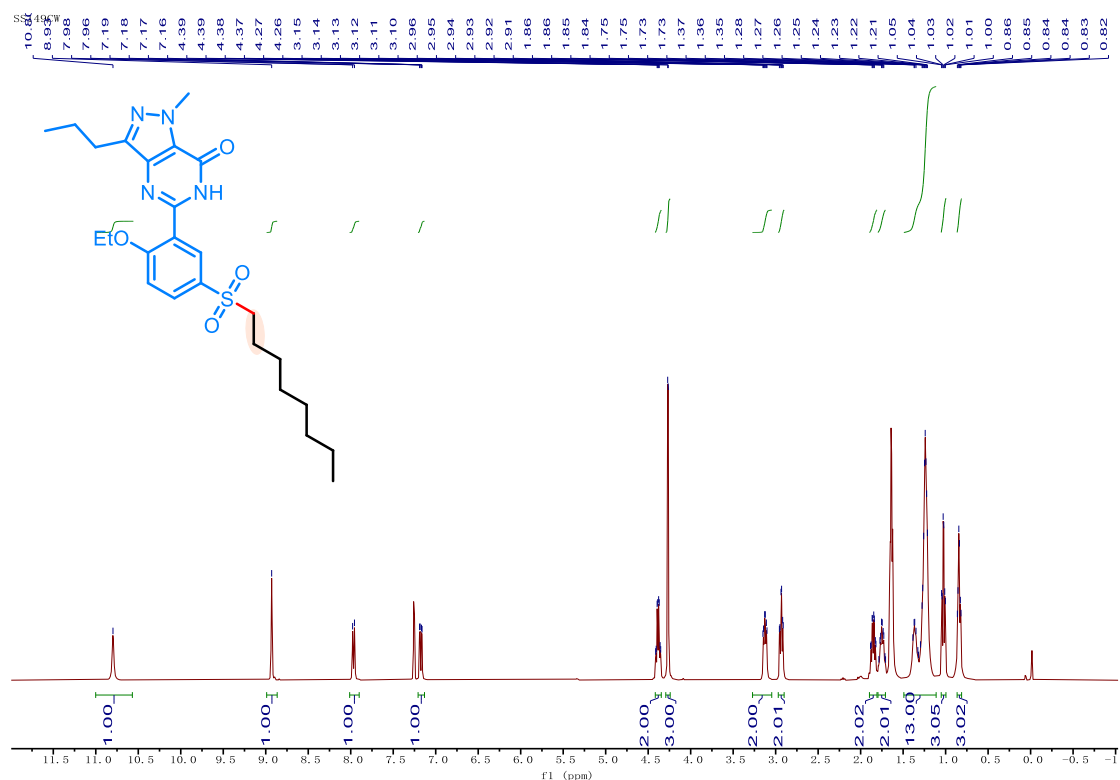

**<sup>13</sup>C {<sup>1</sup>H} NMR Spectrum of 59 (CDCl<sub>3</sub> as solvent, 101 MHz)**

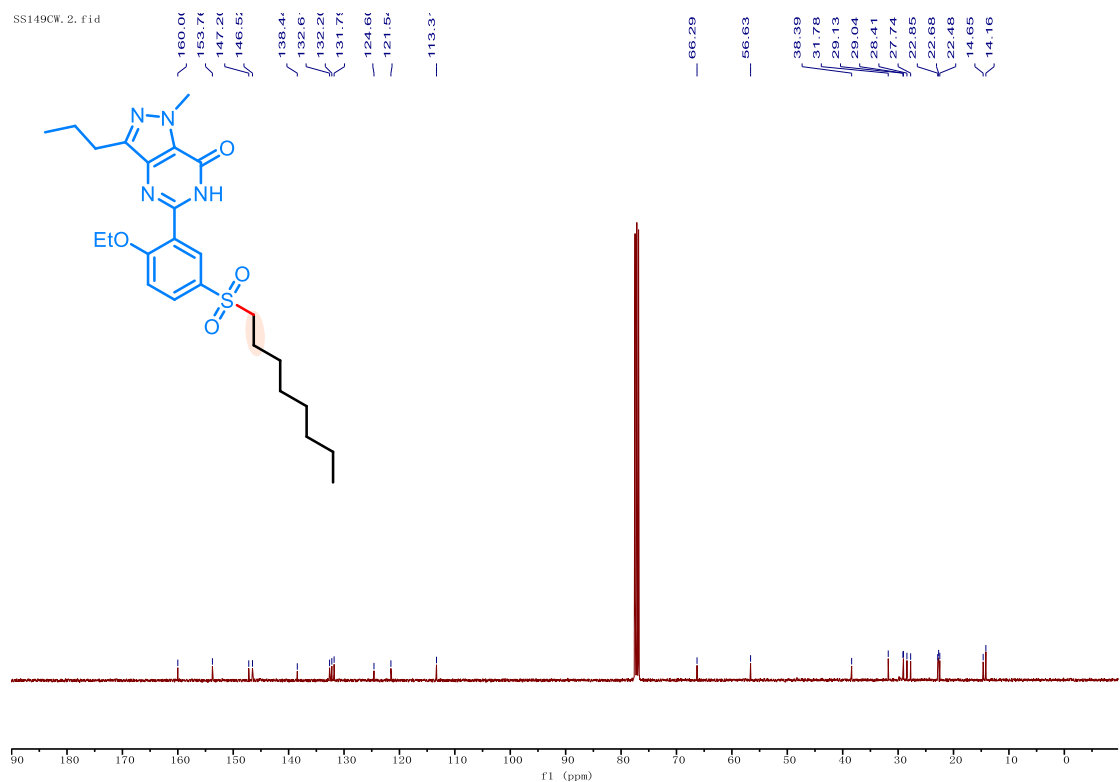

**<sup>1</sup>H NMR Spectrum of 61 (CDCl<sub>3</sub> as solvent, 400 MHz)**

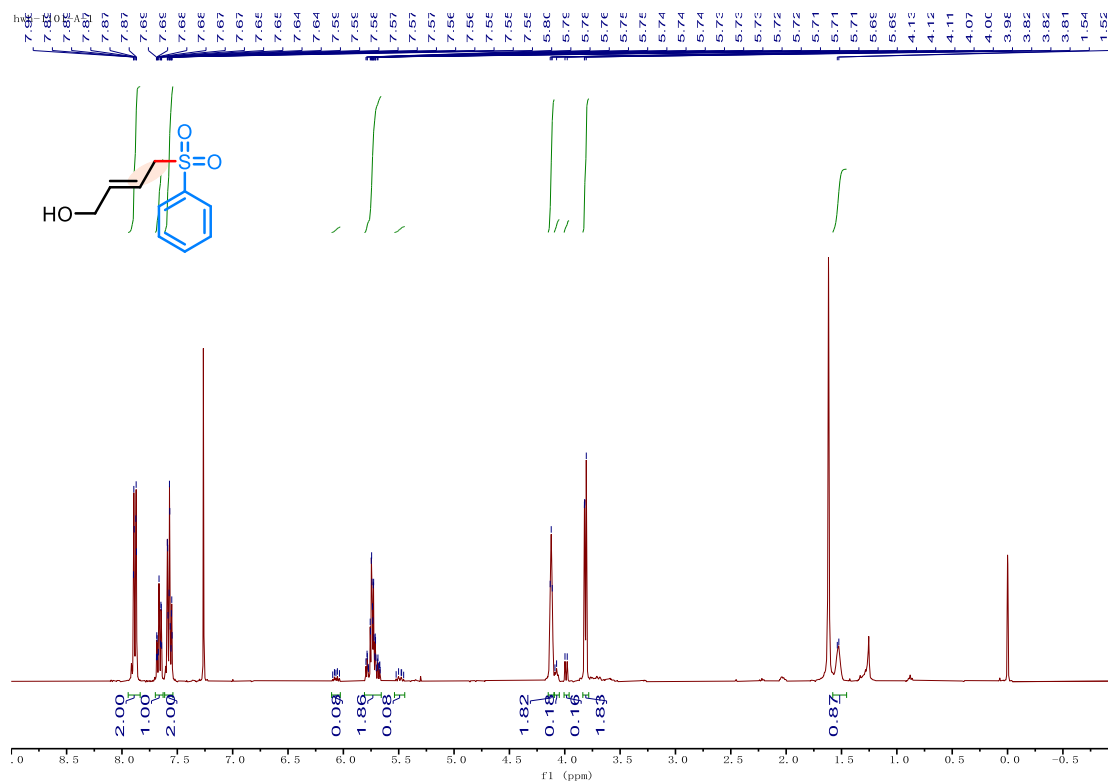



[illegible]

hwh-A-S32-2CW  
single pulse decoupled gated

136.14  
135.34  
133.94  
129.22  
128.84  
125.34

62.51  
62.36  
56.58

40.57  
38.21  
37.28  
35.05  
32.94  
29.29  
27.94  
24.22  
18.40  
17.74

The figure displays a <sup>13</sup>C NMR spectrum of compound 10a. The x-axis represents the chemical shift in ppm, ranging from 0 to 180. The spectrum shows several sharp peaks. Aromatic and alkene carbons are observed between 125 and 137 ppm. A large, intense peak at approximately 78 ppm corresponds to the solvent, CDCl<sub>3</sub>. Aliphatic carbons, including the cyclopropane ring and the side chain, are visible in the 17-63 ppm range. The chemical structure of 10a is shown in the top left corner, featuring a cyclopropane ring fused to a bicyclic system, with a phenylsulfonate group attached to the side chain.

## 5. Crystal data of Products

Qualified crystal of **62** suitable for the X-ray crystallographic study were readily obtained by slow diffusion of n-hexane into methylbenzene solution of **62**. Crystal data Crystallographic data for compound **62** has been deposited with the Cambridge Crystallographic Data Centre.

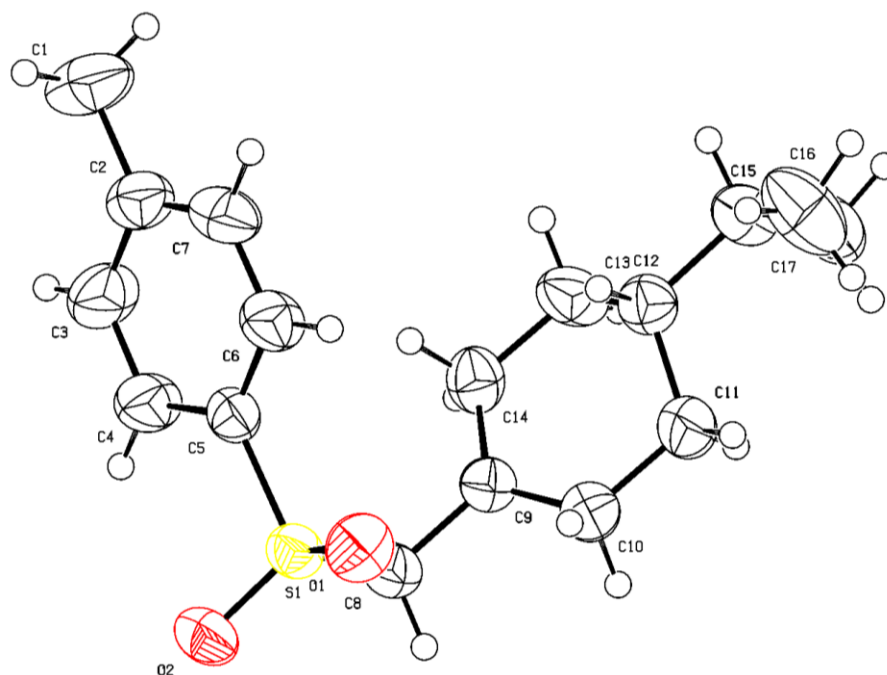

**Supplementary Figure 5.** X-ray structure of **62**(CCDC 2367386). Hydrogen atoms have been omitted for clarity. The ellipsoid contour percent probability level is 50%

|                                  |                                                  |              |  |
|----------------------------------|--------------------------------------------------|--------------|--|
| Identification code              | s20-1_auto                                       |              |  |
| Empirical formula                | C <sub>17</sub> H <sub>25</sub> O <sub>2</sub> S |              |  |
| Formula weight                   | 293.43                                           |              |  |
| Temperature                      | 293K                                             |              |  |
| Crystal system                   | triclinic                                        |              |  |
| Space group                      | P-1                                              |              |  |
| Unit cell dimensions             | a = 7.1654(2)                                    | =86.315(2) ° |  |
|                                  | b = 10.1994(3)                                   | =76.450(3) ° |  |
|                                  | c = 11.9077(4)                                   | =73.545(3) ° |  |
| Volume                           | 811.37(5)Å <sup>3</sup>                          |              |  |
| Z                                | 2                                                |              |  |
| Density                          | 1.201 g/cm <sup>3</sup>                          |              |  |
| Absorption coefficient           | 1.756mm <sup>-1</sup>                            |              |  |
| F(000)                           | 318                                              |              |  |
| Crystal size                     | 0.3 x 0.15 x 0.09 mm <sup>3</sup>                |              |  |
| Completeness to theta = 78.801 ° | 94.1 %                                           |              |  |
| Theta range for data collection  | 7.636 to 157.602 °                               |              |  |
| Index ranges                     | -9 ≤ h ≤ 9, -11 ≤ k ≤ 12, -15 ≤ l ≤ 14           |              |  |

|                                   |                                                   |
|-----------------------------------|---------------------------------------------------|
| Reflections collected             | 9076                                              |
| Independent reflections           | 3293 [R(int) = 0.0311]                            |
| Data/restraints/parameters        | 3293 / 0 / 184                                    |
| Goodness-of-fit on F <sup>2</sup> | 1.188                                             |
| Final R indexes [I ≥ 2σ (I)]      | R <sub>1</sub> = 0.0615, wR <sub>2</sub> = 0.1689 |
| Final R indexes (all data)        | R <sub>1</sub> = 0.0653, wR <sub>2</sub> = 0.1712 |
| Largest diff. peak and hole       | 0.28 and -0.36 e Å <sup>-3</sup>                  |

Qualified crystal of **63** suitable for the X-ray crystallographic study were readily obtained by slow diffusion of n-hexane into methylbenzene solution of **63**. Crystal data Crystallographic data for compound **63** has been deposited with the Cambridge Crystallographic Data Centre.

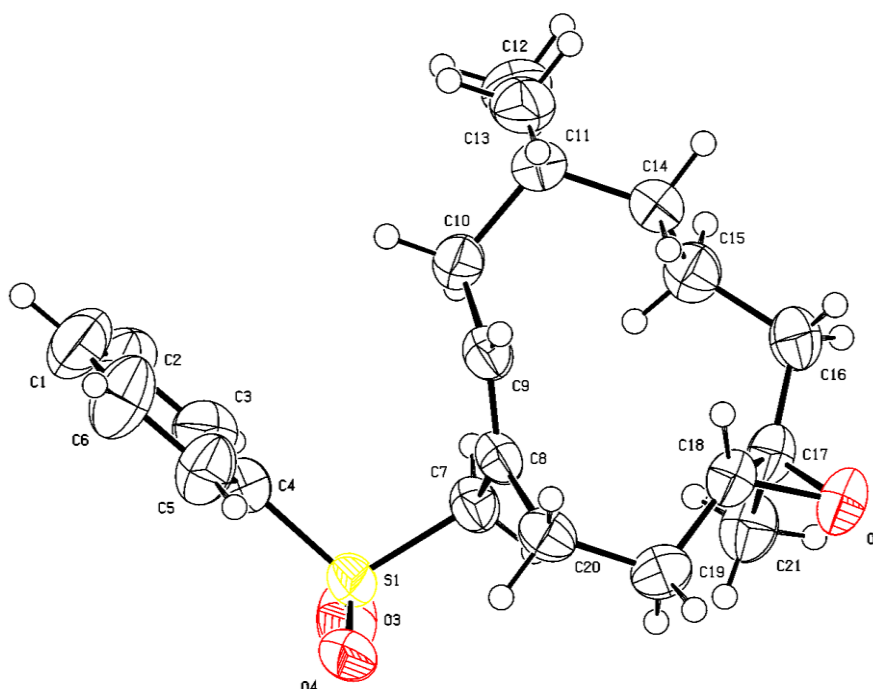

**Supplementary Figure 6.** X-ray structure of **63** (CCDC 2367416). Hydrogen atoms have been omitted for clarity. The ellipsoid contour percent probability level is 50%

|                      |                                                  |        |
|----------------------|--------------------------------------------------|--------|
| Identification code  | SZX_auto                                         |        |
| Empirical formula    | C <sub>21</sub> H <sub>30</sub> O <sub>3</sub> S |        |
| Formula weight       | 362.51                                           |        |
| Temperature          | 293K                                             |        |
| Wavelength           | 1.54184 Å                                        |        |
| Crystal system       | orthorhombic                                     |        |
| Space group          | P2 <sub>1</sub> 2 <sub>1</sub> 2 <sub>1</sub>    |        |
| Unit cell dimensions | a = 8.30717(15)                                  | = 90 ° |
|                      | b = 12.2319(2)                                   | = 90 ° |
|                      | c = 20.0460(3)                                   | = 90 ° |

|                                   |                                                   |
|-----------------------------------|---------------------------------------------------|
| Volume/Å <sup>3</sup>             | 2036.93(7)                                        |
| Z                                 | 4                                                 |
| Density(calculated)               | 1.182Mg/m <sup>3</sup>                            |
| Absorption coefficient            | 0.091mm <sup>-1</sup>                             |
| F(000)                            | 784                                               |
| Crystal size                      | 0.2x 0.16x 0.18mm <sup>3</sup>                    |
| Completeness to theta = 78.637    | 1.55 / 0.89                                       |
| Theta range for data collection   | 8.468 to 157.274 °                                |
| Index ranges                      | -10 ≤ h ≤ 10, -9 ≤ k ≤ 15, -24 ≤ l ≤ 25           |
| Reflections collected             | 7844                                              |
| Independent reflections           | 3905 [R(int) = 0.0269]                            |
| Data/restraints/parameters        | 3905 / 0 / 229                                    |
| Goodness-of-fit on F <sup>2</sup> | 1.069                                             |
| Final R indexes [I>=2σ (I)]       | R <sub>1</sub> = 0.0352, wR <sub>2</sub> = 0.0909 |
| Final R indexes [all data]        | R <sub>1</sub> = 0.0372, wR <sub>2</sub> = 0.0928 |
| Largest diff. peak and hole       | 0.16 and -0.33 e Å <sup>-3</sup>                  |



## 6 References

- [1] Wang, J.; Yu, W. Hydrosulfonylation of Unactivated Alkenes by Visible Light Photoredox Catalysis. *Org. Lett.* **2019**, 21, 9236–9240.
- [2] Huang, M.; Hu, J.; Krummenacher, I.; Friedrich, A.; Braunschweig, H.; Westcott, S.; Radius, U.; Marder, Y. Base-Mediated Radical Borylation of Alkyl Sulfones. *Chem. Eur. J.* **2022**, 28, e202103866 (2 of 9).
- [3] Togo, H.; Matsubayashi, S.; Yamazaki, O.; Yokoyama, M. Deoxygenative Functionalization of Hydroxy Groups via Xanthates with Tetraphenyldisilane. *J. Org. Chem.* **2000**, 65, 2816–2819.
- [4] Roy, T.; Lee, J. Cyanide-Mediated Synthesis of Sulfones and Sulfonamides from Vinyl Sulfones. *Synlett.* **2020**, 31, 455–458.
- [5] Chang, M.; Chen, P. Synthesis of 4-sulfonyl-1,7-diester via  $K_2CO_3$ -mediated alkylative debenzoylation of  $\alpha$ -sulfonyl o-hydroxyacetophenones with acrylates. *Org. Biomol. Chem.*, **2024**, 22, 1194.
- [6] Li, Y.; Wen, J.; Wu, S.; Luo, S.; Ma, C.; Li, S.; Chen, Z.; Liu, S.; Tian, B. Photocatalytic Conversion of Lignin Models into Functionalized Aromatic Molecules Initiated by the Proton-Coupled Electron Transfer Process. *Org. Lett.* **2024**, 26, 1218–1223.
- [7] Xie, X.; Zhang, X.; Yang, H.; Ji, X.; Li, J.; Ding, S. Iridium-Catalyzed Hydrosilylation of Unactivated Alkenes: Scope and Application to Late-Stage Functionalization. *J. Org. Chem.* **2019**, 84, 1085–1093.
- [8] Miura, T.; Moriyama, D.; Miyakawa, S.; Murakami, M. Synthesis of Alkyl Sulfones from Alkenes and Tosylmethylphosphonium Iodide through Photo-Promoted C–C Bond Formation. *Chem. Lett.* **2020**, 49, 1382–1385.
- [9] Xia, X.; Du, J.; Zhang, Y.; Jiang, H.; Cheng, W. Catalyst-Free Visible Light-Driven Hydrosulfonylation of Alkenes and Alkynes with Sulfonyl Chlorides in Water. *ChemSusChem* **2024**, e202400650 (1 of 6).
- [10] Song, Y.; Li, C.; Hu, X.; Zhang, H.; Mao, Y.; Wang, X.; Wang, C.; Hu, L.; Yan, J. Light-Promoted Photocatalyst-Free and Redox-Neutral Hydrosulfonylation of Unactivated Alkenes Using Sulfinic Acid. *Green Chem.* **2024**, 26, 6578.
- [11] Zhang, J.; Ma, H.; Yang, C.; Dang, J.; Xia, J.; Wu, J. Ni-Catalyzed Hydrosulfonylation of Alkenes with Aromatic Iodides and  $K_2S_2O_5$ . *Org. Lett.* **2023**, 25, 8043–8047.
- [12] Yang, X.; Wang, C. Diverse Fates of  $\beta$ -Silyl Radical under Manganese Catalysis: Hydrosilylation and Dehydrogenative Silylation of Alkenes. *Chin. J. Chem.* **2018**, 36, 1047–1051.
- [13] Meng, Y.; Wang, M.; Jiang, X. Multicomponent Reductive Cross-Coupling of an Inorganic Sulfur Dioxide Surrogate: Straightforward Construction of Diversely Functionalized Sulfones. *Angew. Chem. Int. Ed.* **2020**, 59, 1346–1353.
